# Supplementary material for: Self-management interventions for adults with chronic kidney disease: a scoping review
Source: PubMed Central journal article supplement — BMJ Open. 2018 Mar 22;8(3):e019814. doi: 10.1136/bmjopen-2017-019814 (PMC5875600; doi:10.1136/bmjopen-2017-019814), 2018-03-22
Supplement: bmjopen-2017-019814.draft_revisions.pdf [file bmjopen-2017-019814.draft_revisions.pdf]

# BMJ Open

BMJ Open is committed to open peer review. As part of this commitment we make the peer review history of every article we publish publicly available.

When an article is published we post the peer reviewers' comments and the authors' responses online. We also post the versions of the paper that were used during peer review. These are the versions that the peer review comments apply to.

The versions of the paper that follow are the versions that were submitted during the peer review process. They are not the versions of record or the final published versions. They should not be cited or distributed as the published version of this manuscript.

BMJ Open is an open access journal and the full, final, typeset and author-corrected version of record of the manuscript is available on our site with no access controls, subscription charges or pay-per-view fees (<http://bmjopen.bmj.com>).

If you have any questions on BMJ Open's open peer review process please email [info.bmjopen@bmj.com](mailto:info.bmjopen@bmj.com)

# BMJ Open

## Self-management interventions for adults with chronic kidney disease: A scoping review

|                               |                                                                                                                                                                                                                                                                                                                                                                                                                                                                                                                                                                                                                                                                                                                                                                                                                                                                                                                                                                                                                                                                                                                                                                                                                                                      |
|-------------------------------|------------------------------------------------------------------------------------------------------------------------------------------------------------------------------------------------------------------------------------------------------------------------------------------------------------------------------------------------------------------------------------------------------------------------------------------------------------------------------------------------------------------------------------------------------------------------------------------------------------------------------------------------------------------------------------------------------------------------------------------------------------------------------------------------------------------------------------------------------------------------------------------------------------------------------------------------------------------------------------------------------------------------------------------------------------------------------------------------------------------------------------------------------------------------------------------------------------------------------------------------------|
| Journal:                      | <i>BMJ Open</i>                                                                                                                                                                                                                                                                                                                                                                                                                                                                                                                                                                                                                                                                                                                                                                                                                                                                                                                                                                                                                                                                                                                                                                                                                                      |
| Manuscript ID                 | bmjopen-2017-019814                                                                                                                                                                                                                                                                                                                                                                                                                                                                                                                                                                                                                                                                                                                                                                                                                                                                                                                                                                                                                                                                                                                                                                                                                                  |
| Article Type:                 | Research                                                                                                                                                                                                                                                                                                                                                                                                                                                                                                                                                                                                                                                                                                                                                                                                                                                                                                                                                                                                                                                                                                                                                                                                                                             |
| Date Submitted by the Author: | 05-Oct-2017                                                                                                                                                                                                                                                                                                                                                                                                                                                                                                                                                                                                                                                                                                                                                                                                                                                                                                                                                                                                                                                                                                                                                                                                                                          |
| Complete List of Authors:     | <p>Donald, Maoliosa; University of Calgary Cumming School of Medicine, Kaur Kahlon, Bhavneet; University of Calgary Cumming School of Medicine, Medicine<br/>         Beanlands, Heather ; Ryerson University, Daphne Cockwell School of Nursing<br/>         Straus, Sharon; St. Michael's Hospital, Li Ka Shing Knowledge Institute<br/>         Ronksley, Paul; University of Calgary, Community Health Sciences<br/>         Herrington, Gwen<br/>         Tong, Allison; The University of Sydney, Sydney School of Public Health<br/>         Grill, Allan ; University of Toronto, Family &amp; Community Medicine<br/>         Waldvogel, Blair<br/>         Large, Chantel<br/>         Large, Claire<br/>         Harwood, L; Lawson Health Research Institute<br/>         Novak, Marta; University of Toronto, Psychiatry<br/>         James, Matthew; University of Calgary, Department of Medicine<br/>         Elliott, Meghan; University of Calgary, Medicine<br/>         Fernandez, Nicolas<br/>         Brimble, K. S.; 25 Charlton Avenue East, Hamilton, ON, Canada, L8N 1Y2.,<br/>         Medicine<br/>         Samual, Susan; University of Calgary, Pediatrics<br/>         Hemmelgarn, Brenda; Division of Nephrology</p> |
| Keywords:                     | Chronic kidney disease, scoping review, patient-centred care                                                                                                                                                                                                                                                                                                                                                                                                                                                                                                                                                                                                                                                                                                                                                                                                                                                                                                                                                                                                                                                                                                                                                                                         |

SCHOLARONE™  
Manuscripts

## Self-management interventions for adults with chronic kidney disease: A scoping review

**Authorship:** Maoliosa Donald MSc<sup>1,2,3</sup>, Bhavneet Kaur Kahlon MD<sup>3</sup>, Heather Beanlands PhD<sup>4</sup>, Sharon Straus MSc, MD<sup>5,6</sup>, Paul Ronksley PhD<sup>2,3</sup>, Gwen Herrington<sup>7</sup>, Allison Tong PhD<sup>8</sup>, Allan Grill MD<sup>9</sup>, Blair Waldvogel<sup>7</sup>, Chantel A. Large<sup>7</sup>, Claire L. Large<sup>7</sup>, Lori Harwood PhD<sup>10</sup>, Marta Novak PhD, MD<sup>11</sup>, Matthew T. James PhD, MD<sup>1,2,3</sup>, Meghan Elliott MD<sup>6</sup>, Nicolas Fernandez PhD<sup>7</sup>, Scott Brimble MSc, MD<sup>12</sup>, Susan Samuel MSc, MD<sup>13</sup>, Brenda R. Hemmelgarn PhD, MD<sup>1,2,3</sup>

### Affiliations:

<sup>1</sup> Department of Medicine, University of Calgary, Calgary, Alberta, Canada

<sup>2</sup> Interdisciplinary Chronic Disease Collaboration, Calgary, Alberta, Canada

<sup>3</sup> Department of Community Health Sciences, University of Calgary, Calgary, Alberta, Canada

<sup>4</sup> Daphne Cockwell School of Nursing, Ryerson University, Toronto, Ontario, Canada

<sup>5</sup> Institute of Health Policy, Management and Evaluation, University of Toronto, Toronto, Ontario, Canada

<sup>6</sup> Li Ka Shing Knowledge Institute, St. Michael's Hospital, Toronto, Ontario, Canada

<sup>7</sup> Can-SOLVE CKD Network, Patient Partner

<sup>8</sup> Sydney School of Public Health, The University of Sydney, Sydney, New South Wales, Australia

<sup>9</sup> Department of Family & Community Medicine, University of Toronto, Ontario, Canada

<sup>10</sup> Lawson Health Research Institute, London, Ontario, Canada

<sup>11</sup> Centre for Mental Health, University Health Network and Department of Psychiatry, University of Toronto, Toronto, Ontario, Canada

<sup>12</sup> Department of Medicine, McMaster University, Hamilton, Ontario, Canada

<sup>13</sup> Department of Pediatrics, University of Calgary, Calgary, Alberta, Canada

### Corresponding author's address:

Dr. Brenda R Hemmelgarn, MD, PhD, FRCPC

Cumming School of Medicine, University of Calgary

TRW Building, 3rd Floor

3280 Hospital Drive NW

Calgary, AB Canada T2N 4Z6

Phone: 403-210-7065

Fax: (403) 210-9286

Email: [Brenda.Hemmelgarn@albertahealthservices.ca](mailto:Brenda.Hemmelgarn@albertahealthservices.ca)

## CKD self-management interventions

**ABSTRACT**

**Objective:** To systematically identify and describe self-management interventions for adult patients with CKD.

**Setting:** Community-based

**Participants:** Adults with CKD Stages 1 – 5 (not requiring kidney replacement therapy).

**Interventions:** Self-management strategies for adults with CKD.

**Primary and secondary outcome measures:** Using a scoping review, electronic databases and grey literature were searched to October 2016 to identify self-management interventions for adults with CKD Stages 1 – 5 (not requiring kidney replacement therapy). Randomized controlled trials (RCTs), non-RCTs, qualitative and mixed method studies were included and study selection and data extraction were independently performed by two reviewers. Outcomes included behaviors, cognitions, physiological measures, symptoms, health status and health care.

**Results:** 50 studies (19 RCTs, 7 quasi-experimental, 5 observational, 13 pre-post intervention, 1 mixed methods and 5 qualitative) reporting 45 interventions were included. The most common intervention topic was diet/nutrition and interventions were regularly delivered face to face. Interventions were administered by a variety of providers, with nursing professionals the most common health professional group. Cognitions (i.e. changes in general CKD knowledge, perceived self-management, and motivation) was the most frequently reported outcome domain that showed improvement. Less than 1% of the interventions were co-developed with patients and 20% were based on a theory or framework.

1  
2  
3 **Conclusions:** There was a wide range of self-management interventions with considerable  
4  
5  
6  
7  
8  
9  
10  
11  
12  
13  
14  
15  
16  
17  
18  
19  
20  
21  
22  
23  
24  
25  
26  
27  
28  
29  
30  
31  
32  
33  
34  
35  
36  
37  
38  
39  
40  
41  
42  
43  
44  
45  
46  
47  
48  
49  
50  
51  
52  
53  
54  
55  
56  
57  
58  
59  
60  
variability in outcomes for adults with CKD. Major gaps in the literature include lack of patient engagement in the design of the interventions, with the majority of interventions not applying a behavioral change theory to inform their development. This work highlights the need to involve patients to co-develop and evaluate a self-management intervention based on sound theories and clinical evidence.

**Key words:** Chronic kidney disease, scoping review, self-management, patient centred-care

**Strengths and limitations of this study:**

- A strength of this study is that it is the first scoping review to apply the principles of patient-oriented research, where patient partners were engaged in determining the research question, advising us on search terms and reviewing the results to ensure we captured and reported the data meaningfully.
- This scoping review is comprehensive in nature, inclusion of all study designs and consideration of self-management features that have not been investigated previously.
- Due to the heterogeneous nature of the literature, it was challenging to synthesize the data. To address this challenge the two reviewers used two standardized tools to independently extract data, and independently coded the outcomes into categories using the Self-and Family Management Framework.
- A limitation of this scoping review is that we were unable to assess the self-management outcomes in terms of sustained changes in behavior, physiological, and health status.

## CKD self-management interventions

- The scoping review was unable to draw conclusions regarding the most effective self-management intervention for adult patients with CKD, keeping in mind our aim was to review the breadth of the current literature and present the gaps that exist.

For peer review only

## INTRODUCTION

Chronic kidney disease (CKD) is associated with adverse health outcomes, poor quality of life and high health care costs (1). Patients with CKD often experience a number of comorbidities including diabetes, cardiovascular disease and depression (2). They must balance the medical management of their kidney disease and other chronic conditions with demands of their daily lives, including managing the emotional and psychosocial consequences of living with chronic disease. In a recent national research priority setting process, individuals with non-dialysis CKD, their caregivers, and clinicians and policy makers involved in their care, identified the need to develop optimal strategies to enable patients to manage their CKD and related comorbidities to slow or prevent the progression to end-stage kidney disease (ESKD) (3). International data in research priority setting for kidney disease also highlights self-management as a top priority to prevent progression (4).

Self-management interventions aim to facilitate an individual's ability to make lifestyle changes and manage symptoms, treatment, and the physical and psychosocial consequences inherent in living with CKD and associated comorbidities (5). Self-management of CKD involves focusing on illness needs (developing knowledge, skills and confidence to manage medical aspects), activating resources (identifying and accessing resources and supports) and living with the condition (learning to cope with the condition and its impact on their lives as well as the emotional consequences of the illness) (6). Self-management requires patient engagement, however, the degree to which patients are able or willing to participate in self-management can vary, and individual and health system factors may serve as facilitators or barriers to self-management processes (7).

## CKD self-management interventions

1  
2  
3 Despite the high prevalence of CKD and its impact on patient outcomes, there is limited  
4  
5 evidence on the effectiveness of self-management interventions. A prior systematic review (8)  
6  
7 and three integrative reviews (9-11) found that self-management interventions were variable in  
8  
9 their effectiveness for managing and preventing progression of CKD. While these reviews add to  
10  
11 the knowledge base, there has been limited information on describing complex self-management  
12  
13 interventions in detail and providing structured accounts of the interventions and outcomes. In  
14  
15 particular, features of self-management interventions such as patient centeredness, applicability  
16  
17 to co-morbidities associated with CKD, physiological and non-physiological outcomes, and  
18  
19 application of any behavioral change theories are often lacking. Self-management interventions  
20  
21 need to be tailored to suit diverse patient needs and preferences, as well as the local health care  
22  
23 context (7). Therefore, investigating the “who”, “what” and the “how” of self-management  
24  
25 interventions is crucial.  
26  
27  
28  
29

30  
31 To our knowledge there is no literature synthesis that systematically and comprehensively  
32  
33 summarizes the breadth of evidence found in primary quantitative, qualitative and mixed  
34  
35 methods research regarding self-management interventions for adult patients with CKD. Using a  
36  
37 scoping review methodology helps us to understand the range and types of interventions  
38  
39 including both educational and support interventions for CKD to inform the future design of a  
40  
41 self-management intervention. Therefore, we conducted a scoping review to identify and  
42  
43 describe self-management interventions for adult patients with CKD (stages 1 – 5; non-dialysis,  
44  
45 non-transplant).  
46  
47  
48  
49  
50  
51  
52  
53  
54  
55  
56  
57  
58  
59  
60



## MATERIALS AND METHODS

We used a scoping review methodology to enable us to incorporate a broad range of studies and to summarize the knowledge from a variety of sources and types of evidence (12). Our aim was to identify the gaps within the literature for self-management interventions and inform future primary research in this area. A unique and important aspect was the involvement of “patient partners”. Through a national initiative, Canadians Seeking Solutions and Innovations to Overcome CKD (Can-SOLVE CKD), patients work side by side with researchers, clinicians and decision makers to address patient-oriented research priorities (13). Our research team includes Can-SOLVE CKD patient partners with CKD and caregivers (13). Using the Joanna Briggs Institute framework for scoping reviews we undertook the following steps: (1) identified the research question, (2) identified relevant studies, (3) completed study selection, (4) charted, collated, summarized and reported the results, and (5) consulted with our patient partners (12, 14). These steps were iterative to ensure comprehensive inclusion of the literature and continued meaningful engagement with our patient partners. This study does not involve human participants and is exempt from ethics approval.

### Research aim

Our scoping review aimed to determine the available self-management interventions for adults aged 18 years and over and diagnosed with CKD Stages 1 – 5 (not requiring dialysis or transplant).

### Search and selection of studies

We worked with an information specialist (DL) to identify key words that represented the population (CKD) and the intervention (self-management). We searched a broad range of

## CKD self-management interventions

1  
2  
3 information sources including the following online databases: MEDLINE (OVID), EMBASE,  
4  
5 PsycINFO, Cochrane Central Register of Controlled Trials, CINAHL Plus and Cochrane  
6  
7 Database of Systematic Reviews for published studies, with no limits on date (inception to  
8  
9 October 2016), language, age or study design. We also searched Web of Science from 2006 –  
10  
11 October 2016 to capture recently published meeting abstracts and summaries. Using the  
12  
13 Canadian Agency for Drugs and Technology (CADTH) Grey Matters approach, a “search tool  
14  
15 for evidence-based searching on the Internet” (15) we searched Google Canada, Health  
16  
17 Technology Assessment (HTA) agencies (Canada, Australia, Ireland, UK and US), and Clinical  
18  
19 Trials databases (Biomed Central – ISRCTN Registry, US National Institutes of Health,  
20  
21 ClinicalTrials.gov) during October 2016 with no language restrictions (Table S1). Our search  
22  
23 strategy for grey literature was guided by the specific database (i.e. Google search operators,  
24  
25 website search filters) and was completed within a single session for each search strategy to  
26  
27 ensure consistency due to the dynamic nature of the Internet (Table S2). Two reviewers (BK and  
28  
29 MD) also reviewed the reference lists of included studies, along with those identified in past  
30  
31 systematic and integrative reviews of our research topic. We contacted authors of relevant  
32  
33 protocols and conference abstracts to ascertain if their work and findings were published.  
34  
35  
36  
37  
38  
39

40  
41 A study was included if the population involved adults with CKD (stages 1 – 5, non-dialysis,  
42  
43 non-transplant). Self-management interventions included strategies, tools, or resources in any  
44  
45 delivery format (print, electronic, face to face, etc.) that facilitated an individual’s ability to make  
46  
47 lifestyle changes or to manage symptoms, treatment, or the physical and psychosocial  
48  
49 consequences inherent in living with CKD and other associated comorbidities. Interventions  
50  
51 targeted only at selection of treatment for ESKD (i.e. dialysis, kidney transplant) were excluded.  
52  
53  
54 Other self-management interventions or standard care were considered as comparators. We did  
55  
56  
57  
58  
59  
60

1  
2  
3 not define a primary outcome for the purposes of this scoping review. We included primary  
4  
5 studies that used quantitative, qualitative or mixed methods. Systematic and integrative reviews  
6  
7 were identified for the purpose of reviewing their included studies for potential relevant studies.  
8

9  
10 We excluded case series, case studies, case reports, clinical practice guidelines, theses and  
11  
12 opinion-driven reports (editorials, non-systematic or literature/narrative reviews).  
13

14  
15 Three reviewers (BK, MD, and BH) performed an initial screen of titles and abstracts using a  
16  
17 citation screening tool. A calibration exercise was performed by the three reviewers through pilot  
18  
19 testing a random sample of 50 citations with consistent screening achieved ( $\kappa = 0.79$ ) at  
20  
21 which point the three reviewers screened the remaining titles and abstracts. Two reviewers (BK  
22  
23 and MD) followed a similar procedure for identifying relevant full text studies, with good  
24  
25 agreement between reviewers ( $\kappa = 0.78$ ). Disagreements were resolved by consensus or  
26  
27 arbitration by a third reviewer (BH).  
28  
29

### 30 31 **Charting, collating and summarizing the data**

32  
33

34  
35 We developed a data extraction form based on the Template for Intervention Description and  
36  
37 Replication (TIDierR) checklist (16) and the Effective Practice and Organization of Care  
38  
39 (EPOC) data collection form (17). Study characteristics (e.g. study design, country of origin,  
40  
41 publication year), population characteristics (e.g. CKD stage, comorbidities), and self-  
42  
43 management intervention characteristics (e.g. topics, format, target audience, providers, location,  
44  
45 dose, duration, etc.) were documented. For the study outcomes, the two reviewers (BK and MD)  
46  
47 independently coded each outcome into categories identified by Grey et al (e.g. behaviors,  
48  
49 cognitions, physiological measures, symptoms, health status, health care and other) (6). We pilot  
50  
51 tested the form on a random sample of 10 eligible studies and once consensus between the two  
52  
53 reviewers was reached, we independently abstracted data from the remaining eligible studies.  
54  
55  
56  
57  
58  
59

## CKD self-management interventions

1  
2  
3 Data was categorized and reported descriptively. For qualitative studies we identified the  
4 methodology and key concepts presented by the authors.  
5  
6

**RESULTS****Search results**

10  
11  
12  
13  
14 From 12,583 unique citations (Figure 1) we included 50 full text studies.  
15  
16

**Description of studies**

17  
18  
19  
20 A summary of the 50 studies included in this review is provided in Table 1. The most common  
21 study designs were randomized controlled trials (RCTs) (38%). Non-RCTs consisted of quasi-  
22 experimental (14%), observational (10%), pre-post intervention (26%), qualitative (10%) and  
23 mixed methods (2%). The studies were conducted in 14 countries, including the United States  
24 (20%), United Kingdom (14%) and Australia (12%). Most studies were published in the last 5  
25 years (64%).  
26  
27  
28  
29  
30  
31  
32  
33

**Patient population characteristics**

34  
35  
36  
37 The target population in most studies was CKD (72%) and 15 studies mentioned CKD plus one  
38 or more associated comorbidities. The average ages of participants reported across studies were  
39 50.2 to 74.3 years.  
40  
41  
42  
43  
44

**Description of self-management interventions**

45  
46  
47  
48 Table 2 summarizes the characteristics of the self-management interventions. Five studies  
49 reported the same self-management intervention (18-22), therefore 45 interventions were  
50 summarized. The most common intervention topic was diet/nutrition (64%) and the least  
51 common were symptom management and lifestyle (13% and 11% respectively). The most  
52  
53  
54  
55  
56  
57  
58  
59  
60

1  
2  
3 frequent modes of delivering the intervention were face to face (80%), multiple (i.e. more than  
4 one mode) (71%) and print (64%). Electronic was the least common delivery mode (16%).  
5  
6 Interventions were administered by a variety of providers. The most common category of  
7  
8 providers was “other” (56%), which was made up of various types of health professionals and  
9  
10 lay people. However, the most common identifiable group of providers were nursing  
11  
12 professionals (49%). Patient volunteer/mentor was the least common (9%). The outpatient  
13  
14 setting was the most common location for providing the self-management intervention (51%),  
15  
16 and the inpatient setting was the least popular (2%). Many studies did not report the intervention  
17  
18 language (53%), but 12 languages were represented and 7 studies reported that they provided the  
19  
20 intervention in multiple languages.  
21  
22  
23  
24  
25

26  
27 In terms of intervention development, only 20% of studies mentioned the use of evidence such as  
28  
29 theories or frameworks. These included the transtheoretical model of behavior change, social  
30  
31 cognitive theory and chronic care model (23-27). Less than 1% of the studies involved patients in  
32  
33 the design of the intervention, where patients were interviewed regarding intervention content  
34  
35 (23, 28-30).  
36  
37  
38

### 39 **Description of quantitative study outcomes and results**

40  
41  
42 Characteristics of the quantitative study outcomes are presented in Table 3. Twenty-three (46%)  
43  
44 studies measured physiological outcomes (i.e. laboratory tests, body composition, etc.). The least  
45  
46 common outcomes reported by studies were health status and health care (each 10%) and  
47  
48 symptoms (i.e. fatigue) (4%). Table 4 summarizes the details of the quantitative studies. We  
49  
50 categorized the overall study results descriptively as improved, unchanged, or worse. Many  
51  
52 studies had more than one outcome measure (i.e. one measure improved, another had no change)  
53  
54 and they were reported as mixed results. Based on this method of categorization, 89 outcomes  
55  
56  
57  
58  
59  
60

## CKD self-management interventions

1  
2  
3 were reported, of which 61% improved, 20% had no change, 1% worsened, and 13% had mixed  
4  
5 results. Four of the results were reported as not applicable as the outcomes were not relevant. Of  
6  
7 the 54 outcome categories that improved, 15 were cognition, 9 were physiological measures, 8  
8  
9 were behaviors, 8 were individual outcomes, 5 were health status, 4 were health care, 4 were  
10  
11 other, and 1 was symptom management.  
12  
13

**Description of qualitative study outcomes and results**

14  
15  
16  
17  
18 Table 5 summarizes the findings from 6 qualitative studies that look at patient perspectives, one  
19  
20 of these being a mixed methods study. All studies used semi-structured interviews and one also  
21  
22 used a questionnaire. The aims of all these studies were to examine patient perspectives'  
23  
24 regarding the self-management interventions they were involved in. Due to the variety of  
25  
26 interventions (i.e. intervention topics, delivery mode and providers of the intervention) it was  
27  
28 difficult to summarize findings into meaningful categories. Overall, patients highlighted that  
29  
30 interventions needed to be individualized and tailored to their specific situations and preferences  
31  
32 (i.e. awareness of having CKD, stage of CKD, knowledge of the disease, access to resources,  
33  
34 etc.).  
35  
36  
37  
38

**DISCUSSION**

39  
40  
41  
42 To our knowledge, this is the first scoping review involving patient partners to identify and  
43  
44 summarize self-management interventions for adults with CKD. The scoping review  
45  
46 methodology enabled us to systematically summarize a broad range of self-management  
47  
48 interventions, and describe their features. We identified 50 studies that investigated self-  
49  
50 management interventions for adults with CKD, with considerable variation in interventions,  
51  
52 outcomes assessed and results obtained (i.e. some improved and/or some worsened and/or some  
53  
54  
55  
56  
57  
58  
59  
60

1  
2  
3 did not change). We found that self-management interventions for CKD is an emerging area  
4  
5 with most studies published within the last 5 years, and may be related to the growing  
6  
7 recognition of the importance of incorporating patients and their families in managing their  
8  
9 disease to improve outcomes (7).

10  
11  
12  
13 Our findings are similar to prior reviews reporting that the design of self-management  
14  
15 interventions for CKD have not been theoretically driven and have been predominately designed  
16  
17 by healthcare professionals without input from patients (10, 11). Patient-centred care is changing  
18  
19 how healthcare professionals deliver care to patients, but more importantly how patients and  
20  
21 their families are actively involved in self-managing their chronic conditions. Engaging patients  
22  
23 by having them co-design self-management interventions will ensure that patient preferences  
24  
25 based on their values, culture, and psychosocial needs will be addressed in the self-management  
26  
27 intervention (9-11). Through our current national partnership with patients, researchers and  
28  
29 clinicians we have the opportunity to obtain patient perspectives, along with incorporating a  
30  
31 behavior change theory to inform the future design of a self-management intervention for CKD.  
32  
33  
34  
35  
36 Only 28% of studies that we identified included patients with CKD plus other comorbidities,  
37  
38 despite the common presence of comorbidities in this patient population. Less than one-quarter  
39  
40 of included studies provided information on how to manage comorbid conditions such as  
41  
42 tracking lab results and symptom management. This highlights the need to consider “whole  
43  
44 person care”, where the self-management intervention needs to encompass the physical, mental  
45  
46 and emotional needs of the patient (31, 32).  
47  
48  
49  
50  
51  
52  
53  
54  
55  
56  
57  
58  
59  
60

## CKD self-management interventions

Forty-five different self-management interventions were identified, with one or more topics presented in a variety of formats and by a variety of providers. Symptom management and lifestyle topics were not included in many of the interventions. Based on prior work (3), non-dialysis patients with CKD have indicated that these were important topics for them in managing their CKD with an aim to slow the progression of CKD, and will be important to consider in the development of future interventions. Face to face was the most common delivery format while electronic (internet or mobile application) was least common, with many studies reporting multiple formats (i.e. face to face and printed materials). With the expansion of electronic platforms for supporting patients and providers in the uptake of evidence-based care, there is the potential to use an electronic format to support patients in self-managing their CKD and other co-morbidities (33). It is worth noting that there was variability in duration and frequency of face to face encounters, from a single session to multiple sessions over weeks to months. While varied options for in-person delivery is good if it meets the needs of the patients and their families, it may not be feasible on a larger scale due to the resources required. Only 5 studies looked at self-management health care cost-effectiveness, health care utilization and access, each measuring different end-points with mixed results. Future self-management interventions should include the essential principles to self-management (e.g. accessing relevant health information, adhering to multiple treatment protocols, changing health behaviors, shared decision making with healthcare providers) (7, 34), along with evaluation of the cost-effectiveness and resource utilization.

The majority of studies did not identify a single primary outcome but rather multiple outcomes. We found that physiological outcomes (i.e. blood pressure) were the most commonly reported and symptoms were the least mentioned. These findings demonstrate the lack of patient driven



1  
2  
3 outcomes that may be important to them. For example, a patient's individual health goals across  
4 a variety of dimensions (i.e. symptoms, mobility, social and role function in the family or  
5 community) that could possibly maximize their quality of life. Work by Tong et al highlights this  
6 concept, where patients with CKD are more interested in treatment choices that influence non-  
7 traditional clinical outcomes such as impact on family and lifestyle (31). A holistic approach  
8 should be considered where mental and psychosocial outcomes are investigated, rather than just  
9 physiological endpoints.  
10  
11  
12  
13  
14  
15  
16  
17  
18  
19

20 Our findings from the qualitative studies looking at patient perspectives are inconclusive because  
21 of the limited number of studies and the heterogeneity of the interventions. Havas et al (9) in her  
22 integrative review similarly reported a lack of research related to patient perspectives on self-  
23 management in CKD. There is also a lack of qualitative studies overall, which could provide  
24 valuable information regarding attitudes and challenges of self-management interventions from  
25 the perspective of both providers and patients.  
26  
27  
28  
29  
30  
31  
32  
33

34 Strengths of our study include the comprehensive nature of our search, inclusion of all study  
35 designs and consideration of self-management features that have not been investigated  
36 previously. We also engaged patient partners in determining the research question, advising us  
37 on search terms and reviewing the results to ensure we captured and reported the data  
38 meaningfully. One of the main limitations was the challenge in synthesizing the data given its  
39 heterogeneous nature. To address this challenge the two reviewers used two standardized tools  
40 TIDieR (16) and the EPOC tool (17) to independently extract data, and independently coded the  
41 outcomes into categories using the Self-and Family Management Framework (6). Also, we were  
42 unable to assess the self-management outcomes in terms of sustained changes in behavior,  
43 physiological, and health status. A final limitation was our inability to draw conclusions  
44  
45  
46  
47  
48  
49  
50  
51  
52  
53  
54  
55  
56  
57  
58  
59  
60

## CKD self-management interventions

1  
2  
3 regarding the most effective self-management intervention for adult patients with CKD, keeping  
4  
5 in mind our aim was to review the breadth of the current literature and present the gaps that exist.  
6  
7

8 Overall, we found considerable variation in self-management interventions for adults with CKD  
9  
10 with respect to their content and delivery, as well as the outcomes assessed and results obtained.

11  
12 Major gaps in the literature include the lack of patient engagement in the design of the self-  
13  
14 management intervention, along with the lack of a behavioural change theory to inform their  
15  
16 design. Our future research will incorporate intervention frameworks to co-develop and evaluate  
17  
18 a self-management intervention based on a sound behavioral theory involving our national  
19  
20 patient-partners, specialists, primary care providers, and decision makers.  
21  
22  
23

#### 24 25 **ACKNOWLEDGEMENTS**

26  
27  
28 Diane Lorenzetti for providing support and direction regarding search strategies. We would also  
29  
30 like to thank Sarah Gil in assisting us with acquiring full text studies.  
31  
32

#### 33 34 **CONFLICT OF INTEREST STATEMENT**

35  
36 All authors certify that our manuscript has not been published in whole or in part elsewhere, nor  
37  
38 is it currently being considered for publication elsewhere. All authors declare that they have no  
39  
40 relevant conflicts of interest.  
41  
42  
43

#### 44 45 **AUTHORS' CONTRIBUTIONS**

46  
47 Research idea and study design: all authors; data acquisition: MD, BK; data  
48  
49 analysis/interpretation: MD, BK, BRH; supervision or mentorship: BRH, PR. Each author  
50  
51 contributed important intellectual content during manuscript drafting and revisions and accepts  
52  
53  
54  
55  
56  
57  
58  
59  
60

1  
2  
3 accountability for the overall work by ensuring that questions to the accuracy or integrity of any  
4  
5 portion of the work are appropriately investigated and resolved.  
6  
7

## 8 **FUNDING**

9  
10  
11 Ms. Maoliosa Donald is supported by Alberta SPOR Graduate Studentship in Patient-Oriented  
12  
13 Research. Dr. Brenda Hemmelgarn is supported by the Roy and Vi Baay Chair in Kidney  
14  
15 Research, Canadian Institutes of Health Research's Strategy for Patient-Oriented Research  
16  
17 (SPOR). The funding organizations had no role in the design and conduct of the study; data  
18  
19 collection, analysis and interpretation; or preparation, review or approval of the manuscript.  
20  
21  
22

## 23 **DATA SHARING STATEMENT**

24  
25 The following data will be available, study protocol and analysis plan to anyone who wishes to  
26  
27 access the data and will be available immediately following publication from the corresponding  
28  
29 author.  
30  
31  
32

## 33 **TABLES**

34  
35 Table 1 Characteristics of studies

36  
37 Table 2 Overall characteristics of self-management interventions

38  
39 Table 3 Summary of quantitative outcomes

40  
41 Table 4 summary of quantitative studies

42  
43 Table 5 Summary of qualitative studies

## 44 **FIGURES**

45  
46 Figure 1 Prisma flow diagram

## 47 **SUPPLEMENTARY MATERIAL**

48  
49 Table S1. Search strategies used to search traditional databases

50  
51 Table S2. Search strategies used to search Canadian Agency for Drugs and Technology  
52  
53 (CADTH) databases  
54  
55  
56  
57  
58  
59  
60

**REFERENCES**

1. Arora P, Vasa P, Brenner D, et al. Prevalence estimates of chronic kidney disease in Canada: Results of a nationally representative survey. *CMAJ*.185(9):E417-23, 2013
2. Tonelli M, Wiebe N, Guthrie B, et al. Comorbidity as a driver of adverse outcomes in people with chronic kidney disease. *Kidney Int*.88(4):859-66, 2015
3. Hemmelgarn BR, Pannu N, Ahmed SB, et al. Determining the research priorities for patients with chronic kidney disease not on dialysis. *Nephrology, dialysis, transplantation*.32(5):847-54, 2017
4. Tong A, Chando S, Crowe S, et al. A systematic review. *American Journal of Kidney Diseases*.65(5):674-83, 2015
5. Richard AA, Shea K. Delineation of self-care and associated concepts. *J Nurs Scholarsh*.43(3):255-64, 2011
6. Grey M, Schulman-Green D, Knafl K, Reynolds NR. A revised Self- and Family Management Framework. *Nurs Outlook*.63(2):162-70, 2015
7. Novak M, Costantini L, Schneider S, Beanlands H. Approaches to self-management in chronic illness. *Semin Dial*.26(2):188-94, 2013
8. Lopez-Vargas PA, Tong A, Howell M, Craig JC. Educational interventions for patients with CKD: A systematic review. *American Journal of Kidney Diseases*.68(3):353-70, 2016
9. Havas K, Bonner A, Douglas C. Self-management support for people with chronic kidney disease: Patient perspectives. *Journal of Renal Care*.42(1):7-14, 2016
10. Bonner A, Havas K, Douglas C, Thepha T, Bennett P, Clark R. Self-management programmes in stages 1-4 chronic kidney disease: A literature review. *Journal of Renal Care*.40(3):194-204, 2014
11. Welch JL, Johnson M, Zimmerman L, Russell CL, Perkins SM, Decker BS. Self-management interventions in stages 1 to 4 chronic kidney disease: An integrative review. *West J Nurs Res*.37(5):652-78, 2015
12. Levac D, Colquhoun H, O'Brien KK. Scoping studies: Advancing the methodology. *Implementation Science*.IS.5:69, 2010
13. Levin A. Canadians Seeking Solutions and Innovations to Overcome Chronic Kidney Disease (Can-SOLVE CKD). *CIHR Grant*. 2015
14. Peters MD, Godfrey CM, Khalil H, McInerney P, Parker D, Soares CB. Guidance for conducting systematic scoping reviews. *Int J Evid-based Healthc*.13(3):141-6, 2015
15. Canadian Agency for Drugs and Technologies in Health (CADTH). Grey Matters: A practical search tool for evidence-based medicine. <https://www.cadth.ca/resources/finding-evidence/grey-matters>, Accessed September 2015

16. Template for intervention description and replication (TIDieR) checklist. <http://www.equator-network.org/wp-content/uploads/2014/03/TIDieR-Checklist-PDF>, Accessed September 2016
17. Effective Practice and Organisation of Care (EPOC) data collection. <http://epoc.cochrane.org/epoc-specific-resources-review-authors>, Accessed October 2016
18. Blickem C, Kennedy A, Jariwala P. et al. Aligning everyday life priorities with people's self-management support networks: An exploration of the work and implementation of a needs-led telephone support system. *BMC Health Services Research*.14:262, 2014
19. Williams A, Manias E, Cross W, Crawford K. Motivational interviewing to explore culturally and linguistically diverse people's comorbidity medication self-efficacy. *Journal of Clinical Nursing*.24(9-10):1269-79, 2015
20. Williams A, Manias E. Exploring motivation and confidence in taking prescribed medicines in coexisting diseases: A qualitative study. *Journal of Clinical Nursing*.23(3-4):471-81, 2014
21. Walker RC, Marshall MR, Polaschek NR. A prospective clinical trial of specialist renal nursing in the primary care setting to prevent progression of chronic kidney: A quality improvement report. *BMC Family Practice*.15:155, 2014
22. Penaloza-Ramos MC, Jowett S, Mant J, Schwartz C. et al. Cost-effectiveness of self-management of blood pressure in hypertensive patients over 70 years with suboptimal control and established cardiovascular disease or additional cardiovascular risk diseases (TASMIN-SR). *European Journal of Preventive Cardiology*.23(9):902-12, 2016
23. Bryne J, Khunti K, Stone M, Farooqi A, Carr S. Feasibility of a structured group education session to improve self-management of blood pressure in people with chronic kidney disease: An open randomised pilot trial. *BMJ Open*. 2011
24. Kao Y, Huang Y, Chen P, Wang K. The effects of exercise education intervention on the exercise behaviour, depression, and fatigue status of chronic kidney disease patients. *Health Education*.112(6):472-84, 2012
25. Murali S, Arab L, Vargas R, Rastogi A, Ang A, Shetty N. Internet-based tools to assess diet and provide feedback in chronic kidney disease stage IV: A pilot study. *Journal of Renal Nutrition*.23(2):e33-42, 2013
26. Vann JC, Hawley J, Wegner S, Falk RJ, Harward DH, Kshirsagar AV. Nursing intervention aimed at improving self-management for persons with chronic kidney disease in North Carolina Medicaid: A pilot project. *Nephrology Nursing Journal*.42(3):239-55, 2015
27. Montoya V, Sole ML, Norris AE. Improving the care of patients with chronic kidney disease using group visits: A pilot study to reflect an emphasis on the patients rather than the Disease. *Nephrology Nursing Journal*.43(3):207-22, 2016

## CKD self-management interventions

28. Kazawa K, Moriyama M. Effects of a self-management skills-acquisition program on pre-dialysis patients with diabetic nephropathy. *Nephrology Nursing Journal*.40(2):141-8, 2013
29. Nauta J, van der Boog J, Slegten J, Janssen R, Hettinga M. Web-based lifestyle management for chronic kidney disease. *eTELEMED 2013, The Fifth International Conference on eHealth, Telemedicine, and Social Medicine*; Nice, France: 141-146, 2013
30. Thomas N, Bryar R. An evaluation of a self-management package for people with diabetes at risk of chronic kidney disease. *Primary health care research & development*.14(3):270-80, 2013
31. Tong A, Sainsbury P, Chadban S. et al. Patients' experiences and perspectives of living with CKD. *American Journal of Kidney Diseases*.53(4):689-700, 2009
32. Hutchinson TA, Hutchinson N, Arnaert A. Whole person care: Encompassing the two faces of medicine. *CMAJ*.180(8):845-6, 2009
33. Trisolini M, Roussel A, Zerhusen E. et al. Activating chronic kidney disease patients and family members through the Internet to promote integration of care. *Int J Integr Care*.4:e17, 2004
34. Ong SW, Jassal SV, Porter E, Logan AG, Miller JA. Using an electronic self-management tool to support patients with Chronic Kidney Disease (CKD): A CKD clinic self-care model. *Semin Dial*.26(2):195-202, 2013
35. Binik YM, Devins GM, Barre PE. et al. Live and learn: Patient education delays the need to initiate renal replacement therapy in end-stage renal disease. *The Journal of Nervous and Mental Disease*.181(6):371-6, 1993
36. Gillis BP, Caggiula AW, Chiavacci AT. et al. Nutrition intervention program of the modification of diet in renal disease study: A self-management approach. *Journal of the American Dietetic Association*.95(11):1288-94, 1995
37. Devins GM, Barré, PE, Binik YM. Predialysis psychoeducational intervention and coping styles influence time to dialysis in chronic kidney disease. *American Journal of Kidney Diseases*.42(4):693-703, 2003
38. Devins GM, Mendelssohn DC, Barre PE, Taub K, Binik YM. Predialysis psychoeducational intervention extends survival in CKD: A 20-year follow-up. *American Journal of Kidney Diseases*.46(6):1088-98, 2005
39. Campbell KL, Ash S, Bauer JD. The impact of nutrition intervention on quality of life in pre-dialysis chronic kidney disease patients. *Clin Nutr*.27(4):537-44, 2008
40. Chen SH, Tsai YF, Sun CY, Wu IW, Lee CC, Wu MS. The impact of self-management support on the progression of chronic kidney disease--a prospective randomized controlled trial. *Nephrology, Dialysis, Transplantation*.26(11):3560-6, 2011

41. Flesher M, Woo P, Chiu A, Charlebois A, Warburton DE, Leslie B. Self-management and biomedical outcomes of a cooking, and exercise program for patients with chronic kidney disease. *Journal of Renal Nutrition*.21(2):188-95, 2011
42. Joboshi H, Oka M, Takahashi S. et al. Effects of the EASE program in chronic kidney disease education: A randomized controlled trial to evaluate self-management. *J Jpn Acad Nurs Sci*.32(1):21-9, 2012
43. Williams A, Manias E, Walker R, Gorelik A. A multifactorial intervention to improve blood pressure control in co-existing diabetes and kidney disease: A feasibility randomized controlled trial. *Journal of Advanced Nursing*.68(11):2515-25, 2012
44. Williams AM, Liew D, Gock H, Gorelik A. Working with CALD groups: Testing the feasibility of an intervention to improve medication self- management in people with kidney disease, diabetes, and cardiovascular disease. *Renal Society of Australasia Journal*.8(2):62-9, 2012
45. de Brito-Ashurst I, Perry L, Sanders TA. et al. The role of salt intake and salt sensitivity in the management of hypertension in South Asian people with chronic kidney disease: A randomised controlled trial. *Heart*.99(17):1256-60, 2013
46. Paes-Barreto JG, Silva MI, Qureshi AR. et al. Can renal nutrition education improve adherence to a low-protein diet in patients with stages 3 to 5 chronic kidney disease? *Journal of Renal Nutrition*.23(3):164-71, 2013
47. Blakeman T, Blickem C, Kennedy A. et al. Effect of information and telephone-guided access to community support for people with chronic kidney disease: Randomised controlled trial. *PloS one*.9(10):e109135, 2014
48. McManus R, Mant J, Haque MS. et al. Effect of self-monitoring and medication self-titration on systolic blood pressure in hypertensive patients at high risk of cardiovascular disease: The TASMINE-SR randomized clinical trial. *JAMA*.312(8):799, 2014
49. Park J, Lyles RH, Bauer-Wu S. Mindfulness meditation lowers muscle sympathetic nerve activity and blood pressure in African-American males with chronic kidney disease. *American Journal of Physiology Regulatory, Integrative and Comparative Physiology*.307(1):R93-R101, 2014
50. Howden EJC, Strand H, Douglas B, Campbell K, Isbel N. Exercise training in CKD: Efficacy, adherence, and safety. *American Journal of Kidney Diseases*.65(4):583-91, 2015
51. Leehey DJ, Collins E, Kramer HJ. et al. Structured exercise in obese diabetic patients with chronic kidney disease: A randomized controlled trial. *American Journal of Nephrology*.44(1):54-62, 2016
52. Robinson JA, Robinson KJ, Lewis DJ. Games: A motivational educational strategy. *ANNA Journal*.15(5):277-9, 1988

## CKD self-management interventions

- 1  
2  
3 53. Klang B, Bjorvell H, Berglund J, Sundstedt C, Clyne N. Predialysis patient education:  
4 Effects on functioning and well-being in uraemic patients. *Journal of Advanced*  
5 *Nursing*.28(1):36-44, 1998  
6  
7 54. Cupisti A, Morelli E, Meola M, Barsotti M, Barsotti G. Vegetarian diet alternated with  
8 conventional low-protein diet for patients with chronic renal failure. *Journal of Renal*  
9 *Nutrition*.12(1):32-7, 2002  
10  
11 55. Gutierrez Vilaplana JM, Zampieron A, Craver L, Buja A. Evaluation of psychological  
12 outcomes following the intervention 'teaching group': Study on predialysis patients. *Journal of*  
13 *Renal Care*.35(3):159-64, 2009  
14  
15 56. Pagels A, Wang M, Magnusson A, Eriksson A, Melander S. Using patient diary in  
16 chronic illness care: Evaluation of a tool promoting self-care. *Vard I Norden*.28(3):49-52, 2008  
17  
18 57. Yen M, Huang JJ, Teng HL. Education for patients with chronic kidney disease in  
19 Taiwan: A prospective repeated measures study. *Journal of Clinical Nursing*.17(21):2927-34,  
20 2008  
21  
22 58. Gutierrez Vilaplana JM, Pinol ES, Ponsa JC, Moncasi P. Evaluacion de la intervencion  
23 ensenanza: grupo en la consulta de enfermedad renal cronica avanzada. *Rev Soc Esp Enferm*  
24 *Nefrol*.10(4):280-5, 2007  
25  
26 59. Wu IW, Wang SY, Hsu KH. et al. Multidisciplinary predialysis education decreases the  
27 incidence of dialysis and reduces mortality--a controlled cohort study based on the NKF/DOQI  
28 guidelines. *Nephrology Dialysis Transplantation*.24(11):3426-33, 2009  
29  
30 60. Wierdsma J, van Zuilen A, van der Bijl J. Self-efficacy and long-term medication use in  
31 patients with chronic kidney disease. *Journal of Renal Care*.37(3):158-66, 2011  
32  
33 61. Aguilera Florez AI, Velasco MP, Romero LG. et al. A little-used strategy in caring for  
34 patients with chronic kidney disease: Multidisciplinary education of patients and their relatives.  
35 *Enferm Nefrol*.15(1):14-21, 2012  
36  
37 62. Choi ES, Lee J. Effects of a face-to-face self-management program on knowledge, self-  
38 care practice and kidney function in patients with chronic kidney disease before the renal  
39 replacement therapy. *Journal of Korean Academy of Nursing*.42(7):1070-8, 2012  
40  
41 63. Diamantidis CJ, Fink W, Yang S, Zuckerman MR. et al. Directed use of the internet for  
42 health information by patients with chronic kidney disease: prospective cohort study. *J Med*  
43 *Internet Res*.15(11):e251, 2013  
44  
45 64. Lin CC, Tsai FM, Lin HS, Hwang SJ, Chen HC. Effects of a self-management program  
46 on patients with early-stage chronic kidney disease: A pilot study. *Appl Nurs Res*.26(3):151-6,  
47 2013  
48  
49 65. Walker R, Marshall MR, Polaschek NR. Improving self-management in chronic kidney  
50 disease: A pilot study. *Renal Society of Australasia Journal*.9(3):116-25, 2013  
51  
52  
53  
54  
55  
56  
57  
58  
59  
60



- 1  
2  
3 66. Wright Nunes J, Greene JH, Wallston K, Eden S, Shintani A, Elasy T, Rothman R,  
4 Ikizler T, Cavanaugh KL: Pilot study of a physician-delivered education tool to increase patient  
5 knowledge about CKD. *American Journal of Kidney Diseases*.62(1):23-32, 2013  
6  
7 67. Enworom CD, Tabi M. Evaluation of kidney disease education on clinical outcomes and  
8 knowledge of self-management behaviors of patients with chronic kidney disease. *Nephrology*  
9 *Nursing Journal*.42(4):363-72, 2015  
10  
11 68. Cupisti A, D'Alessandro C, Di Iorio B. et al. Nutritional support in the tertiary care of  
12 patients affected by chronic renal insufficiency: Report of a step-wise, personalized, pragmatic  
13 approach. *BMC Nephrology*.17(1):124, 2016  
14  
15 69. Ong SW, Jassal SV, Miller JA. et al. Integrating a Smartphone-Based Self-Management  
16 System into Usual Care of Advanced CKD. *CJASN*.11(6):1054-62, 2016  
17  
18 70. Heiden S, Buus AA, Jensen MH, Hejlesen OK. A diet management information and  
19 communication system to help chronic kidney patients cope with diet restrictions. *Stud Health*  
20 *Technol Inform*.192:543-7, 2013  
21  
22 71. Jansen DL, Heijmans M, Rijken M, Kaptein AA. The development of and first  
23 experiences with a behavioural self-regulation intervention for end-stage renal disease patients  
24 and their partners. *Journal of Health Psychology*.16(2):274-83, 2011  
25  
26  
27  
28  
29  
30  
31  
32  
33  
34  
35  
36  
37  
38  
39  
40  
41  
42  
43  
44  
45  
46  
47  
48  
49  
50  
51  
52  
53  
54  
55  
56  
57  
58  
59  
60

Figure 1. PRISMA Flow Diagram

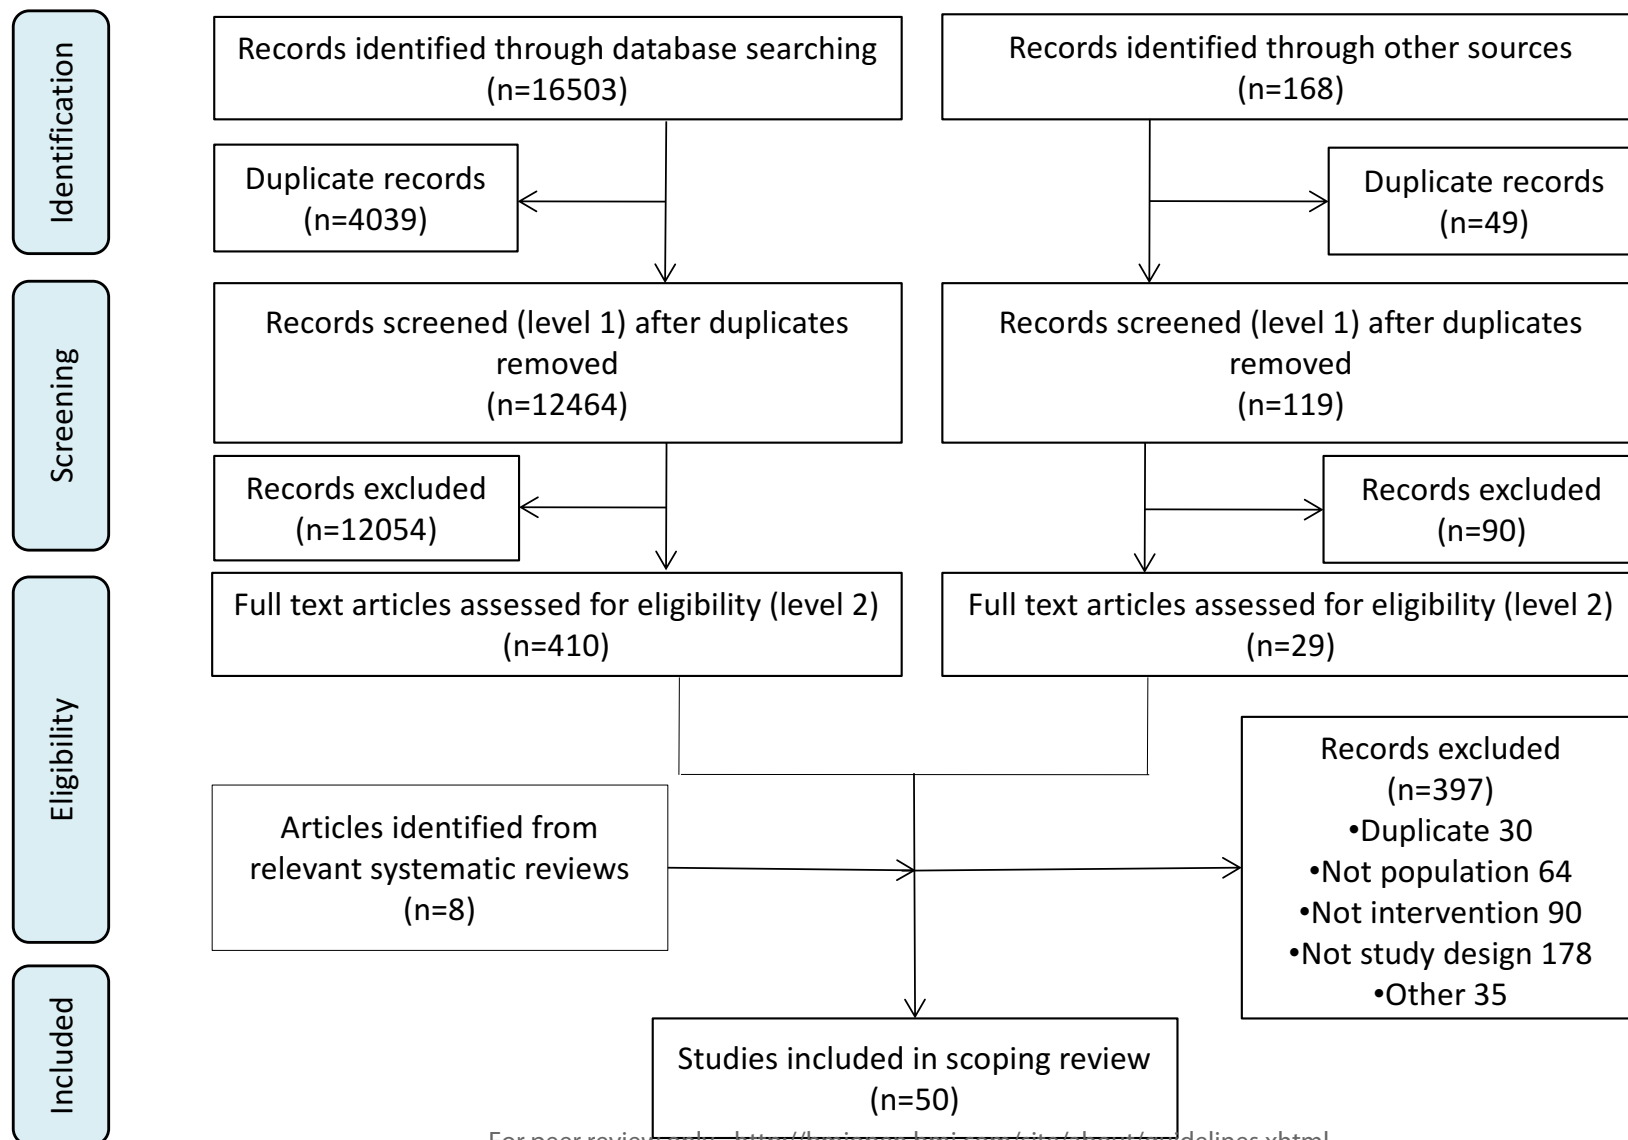

1  
2  
3  
4  
5  
6  
7  
8  
9  
10  
11  
12  
13  
14  
15  
16  
17  
18  
19  
20  
21  
22  
23  
24  
25  
26  
27  
28  
29  
30  
31  
32  
33  
34  
35  
36  
37  
38  
39  
40  
41  
42  
43  
44  
45  
46  
47

**Table 1.** Characteristics of the studies included in scoping review

| Characteristic                             | Studies (N = 50) |
|--------------------------------------------|------------------|
| <b>Study design</b>                        |                  |
| Randomized controlled trial                | 19               |
| Pre-post test                              | 13               |
| Quasi-experimental (controlled/non-random) | 7                |
| Observational                              | 5                |
| Qualitative                                | 5                |
| Mixed methods                              | 1                |
| <b>Origin of study</b>                     |                  |
| United States                              | 10               |
| United Kingdom                             | 7                |
| Australia                                  | 6                |
| Canada                                     | 5                |
| Taiwan                                     | 5                |
| Netherlands                                | 3                |
| Spain                                      | 3                |
| Italy                                      | 2                |
| Japan                                      | 2                |
| New Zealand                                | 2                |
| Sweden                                     | 2                |
| Brazil                                     | 1                |
| Denmark                                    | 1                |
| Korea                                      | 1                |
| <b>Year of publication</b>                 |                  |
| 2012 – 2016                                | 32               |
| 2007 – 2011                                | 11               |
| Prior                                      | 7                |

**Table 2.** Overall characteristics of self-management interventions

| Variable                                        | Intervention count (N = 45) |
|-------------------------------------------------|-----------------------------|
| <b>Intervention topics</b>                      |                             |
| Diet/nutrition                                  | 29                          |
| General CKD knowledge                           | 18                          |
| Other (i.e. advanced care planning, meditation) | 18                          |
| Medication                                      | 17                          |
| Modalities                                      | 13                          |
| Physical activity                               | 13                          |
| Comorbidities                                   | 11                          |
| Symptom management                              | 6                           |
| Lifestyle                                       | 5                           |
| <b>Mode of Delivery</b>                         |                             |
| Face to face (i.e. group, one-on-one)           | 36                          |
| Multiple modes                                  | 32                          |
| Print                                           | 29                          |
| Distance (i.e. telephone, email)                | 13                          |
| Digital (i.e. DVD, PowerPoint, audio recording) | 8                           |
| Electronic (i.e. website, mobile application)   | 7                           |
| <b>Type of providers</b>                        |                             |
| Other*                                          | 25                          |
| Nurse/nurse practitioner                        | 22                          |
| Dietitian                                       | 14                          |
| Multiple providers                              | 13                          |
| Social worker                                   | 6                           |
| Physician/primary care physician                | 6                           |
| Nephrologist/nephrology fellows                 | 5                           |
| Patient volunteer/mentor                        | 4                           |
| Pharmacist                                      | 1                           |
| <b>Location of intervention</b>                 |                             |
| Outpatient                                      | 23                          |
| Not specified                                   | 12                          |
| Community (non-clinic)**                        | 10                          |
| Patient home                                    | 10                          |
| Multiple locations                              | 7                           |
| Inpatient                                       | 1                           |
| <b>Intervention languages</b>                   |                             |
| Not Specified                                   | 24                          |
| English                                         | 10                          |
| Multiple languages                              | 7                           |
| Mandarin                                        | 4                           |
| Spanish                                         | 3                           |
| Taiwanese                                       | 3                           |
| Dutch                                           | 2                           |
| Cantonese                                       | 1                           |

|                                 |   |
|---------------------------------|---|
| French                          | 1 |
| Greek                           | 1 |
| Italian                         | 1 |
| Japanese                        | 1 |
| Swedish                         | 1 |
| Vietnamese                      | 1 |
| <b>Intervention development</b> |   |
| Use of framework or theory      | 9 |
| Co-designed with patients       | 4 |

\*Other providers: Trained research assistant, lay health worker, Bengali worker, Educators (health, cook, diabetic), online tool, physician assistant, exercise physiologist, technician, psychologist, employment expert, instructor, interpreter, physiotherapist, patient, principal investigator

\*\*Community: gym, grocery store, "study room"

**Table 3.** Summary of quantitative study outcomes\*

| Common outcomes       | Description                                                                                                          | Number of Studies |
|-----------------------|----------------------------------------------------------------------------------------------------------------------|-------------------|
| Physiologic measures  | Changes in laboratory tests, blood pressure, body composition, functional/performance tests and cardiovascular risk. | 23                |
| Cognitions            | Changes in general CKD knowledge, self-efficacy, self-management, motivation, perceived stress, anxiety and fear.    | 21                |
| Behaviors             | Adherence to diet, medication, physical activity, sleep, blood pressure control.                                     | 13                |
| Individual Outcomes   | QOL, well-being and general satisfaction.                                                                            | 11                |
| Intervention specific | Reporting of general concepts regarding feasibility of intervention, enjoyment and interest in intervention.         | 9                 |
| Health care           | Measurements of cost effectiveness, health care utilization and access.                                              | 5                 |
| Health status         | Measurements of morbidity and mortality (i.e. time to dialysis, survival, all-cause mortality).                      | 5                 |
| Symptoms              | Changes in overall symptoms (i.e. pain, fatigue)                                                                     | 2                 |

\* Based on primary and distal outcomes from Grey et al (6)  
 CKD – chronic kidney disease; QOL – quality of life

**Table 4.** Summary of quantitative studies

| Study & Year (Reference) | Design | Target Population                                                                 | Study Size Age (years)                                     | Intervention Topic(s)                                                                                                                                       | Provider(s)                | Delivery Format                                                                                          | Description of Intervention                                                                                                                                                                                                                                                                                                                                                                | Study Outcomes                                                                                                                                                                               | Study Results |
|--------------------------|--------|-----------------------------------------------------------------------------------|------------------------------------------------------------|-------------------------------------------------------------------------------------------------------------------------------------------------------------|----------------------------|----------------------------------------------------------------------------------------------------------|--------------------------------------------------------------------------------------------------------------------------------------------------------------------------------------------------------------------------------------------------------------------------------------------------------------------------------------------------------------------------------------------|----------------------------------------------------------------------------------------------------------------------------------------------------------------------------------------------|---------------|
| <b>RCT</b>               |        |                                                                                   |                                                            |                                                                                                                                                             |                            |                                                                                                          |                                                                                                                                                                                                                                                                                                                                                                                            |                                                                                                                                                                                              |               |
| Binik 1993 (35)          | RCT    | Pre-RRT CKD (creatinine $\geq 350 \mu\text{mol/L}$ and rising rapidly)            | 204 (E = 87, C = 92, not part of education = 25) Age: 50.2 | <ul style="list-style-type: none"> <li>General CKD knowledge</li> <li>Diet/nutrition</li> <li>Modalities</li> </ul>                                         | Trained research assistant | <ul style="list-style-type: none"> <li>Print</li> <li>Face to face</li> <li>PowerPoint slides</li> </ul> | “Enhanced education”: <ul style="list-style-type: none"> <li>22-page booklet</li> <li>Individual slide presentation (75 mins)</li> </ul> Duration – one session<br>Comparator: standard care                                                                                                                                                                                               | Health Status: <ul style="list-style-type: none"> <li>Duration between session &amp; dialysis initiation – <i>patient in E group survived 4.6 months longer w/o requiring RRT</i></li> </ul> |               |
| Gillis 1995 (36)         | RCT    | CKD 3-5                                                                           | 840 (unclear) Age: NR                                      | <ul style="list-style-type: none"> <li>Diet/nutrition</li> </ul>                                                                                            | Dietician                  | <ul style="list-style-type: none"> <li>Print</li> <li>Face to face</li> </ul>                            | “Modification of diet in renal disease”: <ul style="list-style-type: none"> <li>“Keeping Track” booklet</li> <li>Monthly meeting with dietician</li> <li>Protein Wise Counter (lists protein content of foods)</li> <li>“Shopping Wise”: a guide to convenience and fast foods</li> <li>Visited restaurants and shops</li> </ul> Duration – 26 months<br>Comparator: standard protein diet | Cognitions: <ul style="list-style-type: none"> <li>Patient reliance on dietician’s feedback, support and modeling strategies - <i>decreased over time in E group</i></li> </ul>              |               |
|                          |        |                                                                                   |                                                            |                                                                                                                                                             |                            |                                                                                                          |                                                                                                                                                                                                                                                                                                                                                                                            | Individual Outcomes: <ul style="list-style-type: none"> <li>Top rated interventions by patients - <i>counseling, self-monitoring, protein counter</i></li> </ul>                             |               |
| Devins 2003 (37)         | RCT    | CKD (creatinine $\leq 300 \mu\text{mol/L}$ and deemed to need RRT in 6-18 months) | 297 (E = 149, C = 148) Age: 58.6                           | <ul style="list-style-type: none"> <li>General CKD knowledge</li> <li>Diet/nutrition</li> <li>Medication</li> <li>Modalities</li> <li>Lifestyles</li> </ul> | Social worker              | <ul style="list-style-type: none"> <li>Print</li> <li>Face to face</li> <li>Telephone</li> </ul>         | “Psychoeducation”: <ul style="list-style-type: none"> <li>60-page booklet</li> <li>90 min interactive educational intervention personalized for each patient</li> <li>Supportive (10 min max) phone calls Q3 weeks</li> </ul>                                                                                                                                                              | Health Status: <ul style="list-style-type: none"> <li>Time to dialysis – <i>E group had 3 month delay in dialysis compared to C group</i></li> </ul>                                         |               |

|                    |     |                                                   |                                          |                                                                                                                                                                    |                                                   |                                                                                                                |                                                                                                                                                                                                                                                                                                                                         |                                                                                                                                                                                                                                                                                                                                      |  |
|--------------------|-----|---------------------------------------------------|------------------------------------------|--------------------------------------------------------------------------------------------------------------------------------------------------------------------|---------------------------------------------------|----------------------------------------------------------------------------------------------------------------|-----------------------------------------------------------------------------------------------------------------------------------------------------------------------------------------------------------------------------------------------------------------------------------------------------------------------------------------|--------------------------------------------------------------------------------------------------------------------------------------------------------------------------------------------------------------------------------------------------------------------------------------------------------------------------------------|--|
|                    |     |                                                   |                                          |                                                                                                                                                                    |                                                   |                                                                                                                | <i>Duration</i> – 18 months or initiation of RRT<br><i>Comparator</i> : standard care                                                                                                                                                                                                                                                   |                                                                                                                                                                                                                                                                                                                                      |  |
| Devins 2005 (38)   | RCT | CKD with progressive reduction in kidney function | 335 (E = 172, C = 163)<br>Age: 47.4-53.9 | <ul style="list-style-type: none"> <li>• General CKD Knowledge</li> <li>• Diet/nutrition</li> <li>• Modalities</li> </ul>                                          | Health educator                                   | <ul style="list-style-type: none"> <li>• Print</li> <li>• Face to face</li> <li>• PowerPoint slides</li> </ul> | <p>“Psychoeducation session”:</p> <ul style="list-style-type: none"> <li>• 22-page booklet</li> <li>• Individual slide presentation (60-75 min long)</li> </ul> <p><i>Duration</i> – one visit<br/><i>Comparator</i>: standard care</p>                                                                                                 | Health Status: <ul style="list-style-type: none"> <li>• Survival pre-dialysis and after dialysis initiation – <i>significantly longer in the E group (2.25 years and 8 months respectively)</i></li> </ul>                                                                                                                           |  |
| Campbell 2008 (39) | RCT | CKD 4-5                                           | 47 (E = 24, C = 23)<br>Age: 68.5-72.6    | <ul style="list-style-type: none"> <li>• Diet/nutrition</li> <li>• Other (i.e. self-management principles)</li> </ul>                                              | Dietician                                         | <ul style="list-style-type: none"> <li>• Face to face</li> <li>• Telephone</li> </ul>                          | <p>“Individual nutritional counseling”:</p> <ul style="list-style-type: none"> <li>• Initial individual consultation with dietician</li> <li>• Then phone follow-up Q2 weeks x 1 month then Q1 month</li> </ul> <p><i>Duration</i>: 12 weeks<br/><i>Comparator</i>: standard care</p>                                                   | Individual outcomes: <ul style="list-style-type: none"> <li>• QOL – <i>many components of KDQOLSF v1.3 improved</i>: <math>\square</math>CKD symptoms, <math>\square</math>cognitive function, vitality*</li> </ul>                                                                                                                  |  |
|                    |     |                                                   |                                          |                                                                                                                                                                    |                                                   |                                                                                                                |                                                                                                                                                                                                                                                                                                                                         | Physiological measures: <ul style="list-style-type: none"> <li>• Nutritional assessment PG-SGA – <i>in E group those who were malnourished at baseline improved, in C group malnourished from 12.5-25%</i></li> </ul>                                                                                                                |  |
| Byrne 2011 (23)    | RCT | CKD 1-4 + HTN                                     | 81 (E = 40, C = 41)<br>Age: 62.8-65.4    | <ul style="list-style-type: none"> <li>• Comorbidities (i.e. HTN management)</li> </ul>                                                                            | Nurse                                             | <ul style="list-style-type: none"> <li>• Print</li> <li>• Face to face</li> <li>• Telephone</li> </ul>         | <p>“Structured education session”:</p> <ul style="list-style-type: none"> <li>• Leaflet on HTN management</li> <li>• CHEERS patient education intervention, and standard care</li> <li>• 2.5 hour group session</li> <li>• Phone support from nurse</li> </ul> <p><i>Duration</i>: one session<br/><i>Comparator</i>: standard care</p> | Intervention specific: <ul style="list-style-type: none"> <li>• Feasibility (recruitment, retention, patient satisfaction, patient access of additional support) - <i>findings suggest delivering/evaluating an effective structured group educational intervention to promote better BP control would be challenging</i></li> </ul> |  |
| Chen 2011 (40)     | RCT | CKD 3-5                                           | 54 (E = 27, C = 27)<br>Age: 68.2         | <ul style="list-style-type: none"> <li>• General CKD knowledge</li> <li>• Diet/nutrition</li> <li>• Medication</li> <li>• Lifestyle</li> <li>• Modality</li> </ul> | Nurse, dietician, nephrologist, peers, volunteers | <ul style="list-style-type: none"> <li>• Print</li> <li>• Face to face</li> <li>• Telephone</li> </ul>         | <p>“Self-management Support”:</p> <ul style="list-style-type: none"> <li>• Individual monthly health education</li> <li>• Weekly telephone based support</li> <li>• Aid of support group twice monthly (5 – 10 patients)</li> </ul> <p><i>Duration</i>: 12 months</p>                                                                   | Physiological measures: <ul style="list-style-type: none"> <li>• eGFR change – <i>higher in E group</i></li> <li>• eGFR reduction of &gt;50% - <i>less in E group</i></li> <li>• ESRD requiring RRT and all-cause mortality – <i>no significant difference between groups</i></li> </ul>                                             |  |



|                    |     |                                              |                               |                                                                                             |                                                        |                                                                                                               |                                                                                                                                                                                                                                                                                                                                                                                                                                                                     |                                                                                                                                                                                                                                                                                                                                                                                                       |  |
|--------------------|-----|----------------------------------------------|-------------------------------|---------------------------------------------------------------------------------------------|--------------------------------------------------------|---------------------------------------------------------------------------------------------------------------|---------------------------------------------------------------------------------------------------------------------------------------------------------------------------------------------------------------------------------------------------------------------------------------------------------------------------------------------------------------------------------------------------------------------------------------------------------------------|-------------------------------------------------------------------------------------------------------------------------------------------------------------------------------------------------------------------------------------------------------------------------------------------------------------------------------------------------------------------------------------------------------|--|
|                    |     |                                              |                               | information for stage IV                                                                    |                                                        |                                                                                                               | <i>Comparator: standard care</i>                                                                                                                                                                                                                                                                                                                                                                                                                                    | Health Status:<br>• # Of hospitalizations in 1 year of follow-up – <i>less in E group</i>                                                                                                                                                                                                                                                                                                             |  |
| Flesher 2011 (41)  | RCT | CKD 3-4 + HTN                                | 40 (E = 23, C = 17) Age: 63.4 | <ul style="list-style-type: none"> <li>Diet/nutrition</li> <li>Physical activity</li> </ul> | Nurse, exercise physiologist, dietician, cook educator | <ul style="list-style-type: none"> <li>Print</li> <li>Face to face</li> </ul>                                 | <p>“Cooking and exercise class”:</p> <ul style="list-style-type: none"> <li>Standard care and:</li> <li>Group CKD nutrition class (with dietician and cook educator: 2 hour sessions over 4 weeks) plus 1 shopping tour led by a dietician</li> <li>CKD cookbook</li> <li>12 week exercise program (3 X 1 hour sessions/week) led by a certified exercise physiologist &amp; nurse</li> </ul> <p><i>Duration: 12 weeks</i><br/><i>Comparator: standard care</i></p> | <p>Physiological measures:</p> <ul style="list-style-type: none"> <li>Improvement in 4/5 of the following: urinary protein, total cholesterol, eGFR decline, BP, urinary sodium – was considered a success – <i>61% in E group vs. 12% in C group</i></li> </ul> <p>Behaviors:</p> <ul style="list-style-type: none"> <li>SM score – <i>some changes in some components in both groups</i></li> </ul> |  |
| Joboshi 2012 (42)  | RCT | CKD                                          | 31 (E = 19, C = 12) Age: 69.8 | • Other                                                                                     | Nurse                                                  | <ul style="list-style-type: none"> <li>Face to face</li> <li>Telephone</li> <li>Email</li> </ul>              | <p>“EASE (encourage autonomous self-enrichment) program”:</p> <ul style="list-style-type: none"> <li>Nurses listen to what patients have difficulties and discuss how they will try to improve</li> <li>Face to face interview monthly</li> <li>Telephone or email contact every 2 weeks</li> </ul> <p><i>Duration: 12 weeks</i><br/><i>Comparator: standard care</i></p>                                                                                           | <p>Cognitions:</p> <ul style="list-style-type: none"> <li>Self-efficacy</li> </ul> <p>Behaviors:</p> <ul style="list-style-type: none"> <li>Medication adherence</li> <li>Adherence to BP and weight measurements</li> <li>Limiting salt intake</li> <li>Alcohol consumption</li> <li>Smoking</li> </ul> <p>Physiological measures:</p> <ul style="list-style-type: none"> <li>BP</li> </ul>          |  |
| Williams 2012 (43) | RCT | CKD 2-4 (diabetic kidney disease) + DM + HTN | 75 (E = 39, C = 41) Age: 67   | <ul style="list-style-type: none"> <li>Medication</li> <li>Comorbidities</li> </ul>         | Nurse                                                  | <ul style="list-style-type: none"> <li>Print</li> <li>Face to face</li> <li>Telephone</li> <li>DVD</li> </ul> | <p>“Multifactorial intervention”:</p> <ul style="list-style-type: none"> <li>Individual medication review (draw chart)</li> <li>Daily self-monitoring of BP x 3 months</li> </ul>                                                                                                                                                                                                                                                                                   | <p>Physiological measures:</p> <ul style="list-style-type: none"> <li>BP – <i>no difference between groups</i></li> </ul>                                                                                                                                                                                                                                                                             |  |

|                                                                                                                          |     |                                                |                                       |                                                                                                                               |                              |                                                                                                                                     |                                                                                                                                                                                                                                                                                                                                                                                                                                                                                               |                                                                                                                                                                                                                                                           |  |
|--------------------------------------------------------------------------------------------------------------------------|-----|------------------------------------------------|---------------------------------------|-------------------------------------------------------------------------------------------------------------------------------|------------------------------|-------------------------------------------------------------------------------------------------------------------------------------|-----------------------------------------------------------------------------------------------------------------------------------------------------------------------------------------------------------------------------------------------------------------------------------------------------------------------------------------------------------------------------------------------------------------------------------------------------------------------------------------------|-----------------------------------------------------------------------------------------------------------------------------------------------------------------------------------------------------------------------------------------------------------|--|
|                                                                                                                          |     |                                                |                                       |                                                                                                                               |                              |                                                                                                                                     | <ul style="list-style-type: none"> <li>• 20 min DVD</li> <li>• Q2 week motivational interviewing follow up via phone x 12 weeks to support BP management and optimize medication SM</li> </ul> <p><i>Duration: 12 weeks</i><br/><i>Comparator: standard care</i></p>                                                                                                                                                                                                                          | <p>Behaviors:</p> <ul style="list-style-type: none"> <li>• Medication adherence – <i>no difference between groups</i></li> </ul>                                                                                                                          |  |
| Williams 2012 (44)                                                                                                       | RCT | CKD 2-4 + DM + cardiovascular disease          | 78 (E = 40, C = 38)<br>Age: 74.31     | <ul style="list-style-type: none"> <li>• Medication</li> <li>• Comorbidities</li> <li>• Other (i.e. self-efficacy)</li> </ul> | Nurse, interpreter           | <ul style="list-style-type: none"> <li>• Print</li> <li>• Face to face</li> <li>• Telephone</li> <li>• PowerPoint slides</li> </ul> | <p>“Self-efficacy Medication Intervention (SEM)”:</p> <ul style="list-style-type: none"> <li>• Individual medication review – chart in English but interpreter wrote on medication boxes in patients language or used symbols</li> <li>• Individual slide presentation (20 minutes) via interpreter (Greek, Italian, Vietnamese)</li> <li>• Q2 week motivational interviewing follow-up via phone x 12 weeks</li> </ul> <p><i>Duration: 12 weeks</i><br/><i>Comparator: standard care</i></p> | <p>Intervention specific:</p> <ul style="list-style-type: none"> <li>• Attrition rate to assess feasibility of study – <i>high attrition</i></li> </ul>                                                                                                   |  |
|                                                                                                                          |     |                                                |                                       |                                                                                                                               |                              |                                                                                                                                     |                                                                                                                                                                                                                                                                                                                                                                                                                                                                                               | <p>Cognitions:</p> <ul style="list-style-type: none"> <li>• Medication self-efficacy – <i>no difference between groups</i></li> </ul>                                                                                                                     |  |
|                                                                                                                          |     |                                                |                                       |                                                                                                                               |                              |                                                                                                                                     |                                                                                                                                                                                                                                                                                                                                                                                                                                                                                               | <p>Health care:</p> <ul style="list-style-type: none"> <li>• Health care utilization – <i>no difference between groups</i></li> </ul>                                                                                                                     |  |
|                                                                                                                          |     |                                                |                                       |                                                                                                                               |                              |                                                                                                                                     |                                                                                                                                                                                                                                                                                                                                                                                                                                                                                               | <p>Physiological measures:</p> <ul style="list-style-type: none"> <li>• Routine clinical lab surrogate measures – <i>no difference</i></li> </ul>                                                                                                         |  |
|                                                                                                                          |     |                                                |                                       |                                                                                                                               |                              |                                                                                                                                     |                                                                                                                                                                                                                                                                                                                                                                                                                                                                                               | <p>Behaviors:</p> <ul style="list-style-type: none"> <li>• Medication adherence – <i>no difference</i></li> </ul>                                                                                                                                         |  |
| <p>Individual outcomes:</p> <ul style="list-style-type: none"> <li>• General wellbeing – <i>no difference</i></li> </ul> |     |                                                |                                       |                                                                                                                               |                              |                                                                                                                                     |                                                                                                                                                                                                                                                                                                                                                                                                                                                                                               |                                                                                                                                                                                                                                                           |  |
| De Brito 2013 (45)                                                                                                       | RCT | CKD 3-5 + HTN (BP>130/80) + Bengali population | 56 (E = 28, C = 28)<br>Age: 55.7-60.7 | <ul style="list-style-type: none"> <li>• Diet/nutrition</li> </ul>                                                            | Dietician and Bengali worker | <ul style="list-style-type: none"> <li>• Face to face</li> <li>• Telephone</li> </ul>                                               | <p>“Diet advice “:</p> <ul style="list-style-type: none"> <li>• Practical cooking &amp; education sessions in the community facilitated by a Bengali worker</li> <li>• Followed by Q2 week phone calls to reinforce advice and set new targets</li> </ul> <p><i>Duration: 6 months</i><br/><i>Comparator: Standard care</i></p>                                                                                                                                                               | <p>Physiological measures:</p> <ul style="list-style-type: none"> <li>• BP – <i>decreased by 8mmHg in E group</i></li> <li>• 24 hour urinary salt excretion – <i>decrease in E group</i></li> <li>• eGFR – <i>no difference between groups</i></li> </ul> |  |

1  
2  
3  
4  
5  
6  
7  
8  
9  
10  
11  
12  
13  
14  
15  
16  
17  
18  
19  
20  
21  
22  
23  
24  
25  
26  
27  
28  
29  
30  
31  
32  
33  
34  
35  
36  
37  
38  
39  
40  
41  
42  
43  
44  
45  
46  
47

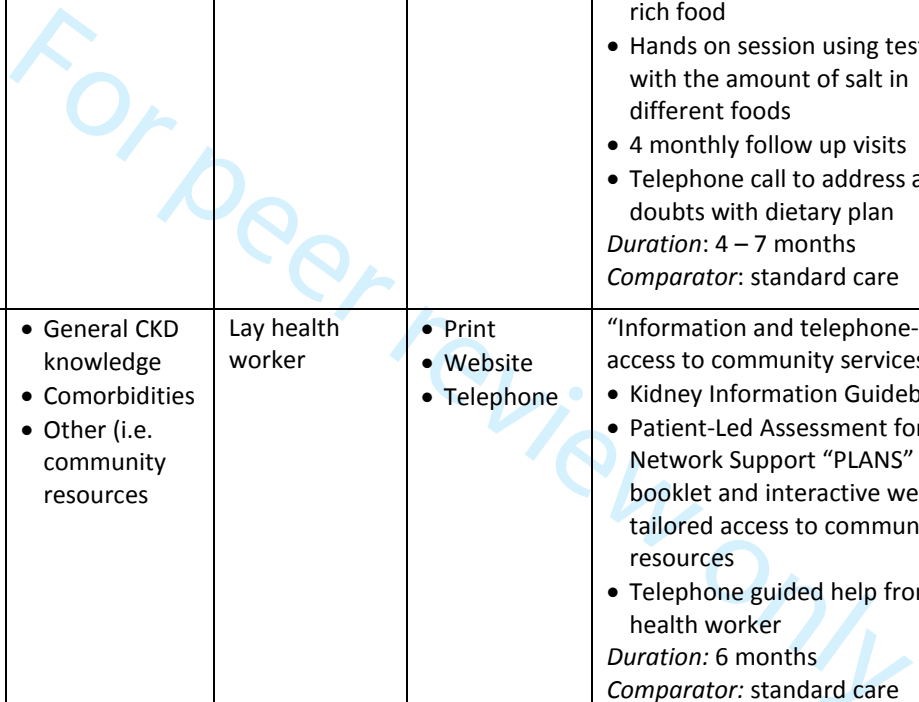

|                        |     |                                     |                                                |                                                                                                                                          |                               |                                                                                                  |                                                                                                                                                                                                                                                                                                                                                                                                                                                                                                                                                                 |                                                                                                                                                                                                                                                                                                                                                                                                                                                                |  |
|------------------------|-----|-------------------------------------|------------------------------------------------|------------------------------------------------------------------------------------------------------------------------------------------|-------------------------------|--------------------------------------------------------------------------------------------------|-----------------------------------------------------------------------------------------------------------------------------------------------------------------------------------------------------------------------------------------------------------------------------------------------------------------------------------------------------------------------------------------------------------------------------------------------------------------------------------------------------------------------------------------------------------------|----------------------------------------------------------------------------------------------------------------------------------------------------------------------------------------------------------------------------------------------------------------------------------------------------------------------------------------------------------------------------------------------------------------------------------------------------------------|--|
| Paes-Barreto 2013 (46) | RCT | CKD 3-5                             | 89<br>(E = 43,<br>C = 46)<br>Age: 63.4         | <ul style="list-style-type: none"> <li>Diet/nutrition</li> </ul>                                                                         | Dietician                     | <ul style="list-style-type: none"> <li>Print</li> <li>Face to face</li> <li>Telephone</li> </ul> | <p>“Nutrition Education Program”:</p> <ul style="list-style-type: none"> <li>Standard dietary counseling AND</li> <li>Education folder with recipes to replace salt with sodium free seasoning blends</li> <li>Individual 15-20 minute class</li> <li>Hands on session about protein rich food</li> <li>Hands on session using test tubes with the amount of salt in different foods</li> <li>4 monthly follow up visits</li> <li>Telephone call to address any doubts with dietary plan</li> </ul> <p>Duration: 4 – 7 months<br/>Comparator: standard care</p> | <p>Behaviors:</p> <ul style="list-style-type: none"> <li>Reduction in protein intake – <i>decreased</i></li> <li>Adherence to low protein diet – <i>effective</i></li> </ul> <hr/> <p>Physiological measures:</p> <ul style="list-style-type: none"> <li>Body composition: waist circumference, body fat, BMI, mid-arm muscle circumference – <i>no change</i></li> <li>Serum albumin – <i>no change</i></li> </ul>                                            |  |
| Blakeman 2014 (47)     | RCT | CKD 3                               | 436<br>(E = 215,<br>C = 221)<br>Age: 72.1      | <ul style="list-style-type: none"> <li>General CKD knowledge</li> <li>Comorbidities</li> <li>Other (i.e. community resources)</li> </ul> | Lay health worker             | <ul style="list-style-type: none"> <li>Print</li> <li>Website</li> <li>Telephone</li> </ul>      | <p>“Information and telephone-guided access to community services”:</p> <ul style="list-style-type: none"> <li>Kidney Information Guidebook</li> <li>Patient-Led Assessment for Network Support “PLANS” booklet and interactive website – tailored access to community resources</li> <li>Telephone guided help from a lay health worker</li> </ul> <p>Duration: 6 months<br/>Comparator: standard care</p>                                                                                                                                                     | <p>Cognitions:</p> <ul style="list-style-type: none"> <li>Positive &amp; active engagement in life (heiQ) – <i>no difference between groups</i></li> </ul> <hr/> <p>Physiological measures:</p> <ul style="list-style-type: none"> <li>BP control – <i>better BP maintenance in E group</i></li> </ul> <hr/> <p>Individual outcomes:</p> <ul style="list-style-type: none"> <li>Health related QOL (EuroQoL EQ-5D index) – <i>higher in E group</i></li> </ul> |  |
| McManus 2014 (48)      | RCT | HTN (BP>130/80) + CKD3 or DM or CHD | 555<br>(E = 277,<br>C = 278)<br>Age: 69.3-69.6 | <ul style="list-style-type: none"> <li>Medication</li> <li>Comorbidities</li> </ul>                                                      | General practitioner, patient | <ul style="list-style-type: none"> <li>Print</li> <li>Face to face</li> </ul>                    | <p>“Self-monitoring of BP and self-titration of medications”:</p> <ul style="list-style-type: none"> <li>Self-monitoring of BP</li> <li>Self-titration of medications following a 3-step plan designed by general practitioner and patient</li> </ul> <p>Duration: 12 months</p>                                                                                                                                                                                                                                                                                | <p>Physiological measures:</p> <ul style="list-style-type: none"> <li>SBP at 12months – <i>no difference</i></li> </ul> <hr/> <p>Health care:</p> <ul style="list-style-type: none"> <li>Prescription of anti-hypertensive medications – <i>increased in both groups but</i></li> </ul>                                                                                                                                                                        |  |
|                        |     |                                     |                                                |                                                                                                                                          |                               |                                                                                                  |                                                                                                                                                                                                                                                                                                                                                                                                                                                                                                                                                                 | <ul style="list-style-type: none"> <li>Prescription of anti-hypertensive medications – <i>increased in both groups but</i></li> </ul>                                                                                                                                                                                                                                                                                                                          |  |

|                  |     |                                                      |                                         |                                                                           |                                                                                                      |                                                                                         |                                                                                                                                                                                                                                                                                                                                                                                                                                                                                                                                                                                                                                                                                                                                           |                                                                                                                                                                            |   |
|------------------|-----|------------------------------------------------------|-----------------------------------------|---------------------------------------------------------------------------|------------------------------------------------------------------------------------------------------|-----------------------------------------------------------------------------------------|-------------------------------------------------------------------------------------------------------------------------------------------------------------------------------------------------------------------------------------------------------------------------------------------------------------------------------------------------------------------------------------------------------------------------------------------------------------------------------------------------------------------------------------------------------------------------------------------------------------------------------------------------------------------------------------------------------------------------------------------|----------------------------------------------------------------------------------------------------------------------------------------------------------------------------|---|
|                  |     |                                                      |                                         |                                                                           |                                                                                                      |                                                                                         | Comparator: standard care                                                                                                                                                                                                                                                                                                                                                                                                                                                                                                                                                                                                                                                                                                                 | greater significance in E group                                                                                                                                            |   |
|                  |     |                                                      |                                         |                                                                           |                                                                                                      |                                                                                         |                                                                                                                                                                                                                                                                                                                                                                                                                                                                                                                                                                                                                                                                                                                                           | Symptom mgmt.:                                                                                                                                                             |   |
|                  |     |                                                      |                                         |                                                                           |                                                                                                      |                                                                                         |                                                                                                                                                                                                                                                                                                                                                                                                                                                                                                                                                                                                                                                                                                                                           | <ul style="list-style-type: none"> <li>Adverse effects – no significant difference between groups</li> </ul>                                                               | ● |
|                  |     |                                                      |                                         |                                                                           |                                                                                                      |                                                                                         |                                                                                                                                                                                                                                                                                                                                                                                                                                                                                                                                                                                                                                                                                                                                           | <ul style="list-style-type: none"> <li>Individual outcomes:</li> <li>QOL - no significant difference between groups</li> </ul>                                             | ● |
| Park 2014 (49)   | RCT | CKD3 + HTN + African American                        | 15<br>Age: 58.7                         | <ul style="list-style-type: none"> <li>Other (i.e. meditation)</li> </ul> | Principle investigator, patient                                                                      | <ul style="list-style-type: none"> <li>Face to face</li> <li>Audio recording</li> </ul> | <p>“Mindfulness meditation (MM)”</p> <ul style="list-style-type: none"> <li>14 min of pre-recorded guided MM using MP3 player &amp; headphones</li> </ul> <p>Duration: one session</p> <p>Comparator: BP education</p>                                                                                                                                                                                                                                                                                                                                                                                                                                                                                                                    | <p>Physiological measures:</p> <ul style="list-style-type: none"> <li>BP – decrease in SBP/ DBP/ HR/ MAP</li> <li>Muscle sympathetic nerve activity – decreased</li> </ul> | ● |
| Howden 2015 (50) | RCT | CKD 3-4 & >1 uncontrolled cardiovascular risk factor | 72<br>(E = 36, C = 36)<br>Age 60.2-62.0 | <ul style="list-style-type: none"> <li>Physical activity</li> </ul>       | Nurse practitioner, social worker, exercise physiologist, dietician, psychologist, diabetes educator | <ul style="list-style-type: none"> <li>Print</li> <li>Face to face</li> </ul>           | <p>“Exercise training and lifestyle intervention”:</p> <ul style="list-style-type: none"> <li>Standard care AND</li> <li>Detailed medical/ surgical history taken by nurse practitioner</li> <li>Education about exercising safely: maintaining hydration, signs/ symptoms of abnormal response to exercise</li> <li>If diabetic – education on hypoglycemia</li> <li>Exercise prescription individualized on patient’s comorbid conditions</li> <li>Goal = 150min/week of moderate intensity exercise plus resistance training</li> <li>8 weeks supervised, then 10 month home based</li> <li>Patients got: exercise ball, resistance training booklet</li> <li>Patients contacted regularly to monitor adherence to training</li> </ul> | <p>Physiological measures:</p> <ul style="list-style-type: none"> <li>METS – improved*</li> <li>6 minute walk distance – improved*</li> <li>BMI – improved*</li> </ul>     | ● |

|                         |     |                                                             |                                                             |                                                                                                                                                                                        |                                                                        |                                                                                                          |                                                                                                                                                                                                                                                                                                                                                                                                                                                                                                                                                                                                                                             |                                                                                                                                                                                                                                                                                                                                                                                                                                                                                                                                      |                                                                              |  |
|-------------------------|-----|-------------------------------------------------------------|-------------------------------------------------------------|----------------------------------------------------------------------------------------------------------------------------------------------------------------------------------------|------------------------------------------------------------------------|----------------------------------------------------------------------------------------------------------|---------------------------------------------------------------------------------------------------------------------------------------------------------------------------------------------------------------------------------------------------------------------------------------------------------------------------------------------------------------------------------------------------------------------------------------------------------------------------------------------------------------------------------------------------------------------------------------------------------------------------------------------|--------------------------------------------------------------------------------------------------------------------------------------------------------------------------------------------------------------------------------------------------------------------------------------------------------------------------------------------------------------------------------------------------------------------------------------------------------------------------------------------------------------------------------------|------------------------------------------------------------------------------|--|
|                         |     |                                                             |                                                             |                                                                                                                                                                                        |                                                                        |                                                                                                          | <i>Duration: 12 months</i><br><i>Comparator: standard care</i>                                                                                                                                                                                                                                                                                                                                                                                                                                                                                                                                                                              |                                                                                                                                                                                                                                                                                                                                                                                                                                                                                                                                      |                                                                              |  |
| Leehey<br>2016<br>(51)  | RCT | CKD 2-4 +<br>DM2 +<br>BMI>30 +<br>persistent<br>proteinuria | 36<br>(Exercise<br>+ diet =<br>18,<br>Diet = 18)<br>Age: 66 | <ul style="list-style-type: none"> <li>Diet/nutrition</li> <li>Physical activity</li> </ul>                                                                                            | Personal<br>trainer                                                    | <ul style="list-style-type: none"> <li>Face to face</li> <li>Telephone</li> </ul>                        | <p>“Structured exercise program”:</p> <ul style="list-style-type: none"> <li>Dietary counseling = baseline nutritional counseling with 9 follow-up phone calls (both groups) AND</li> <li>Supervised exercise program 3x/week (60 min cardio plus 25-30 min resistance training)</li> <li>Followed by home exercise phase: 3x/week x 60 min with weekly follow-up phone calls &amp; patient encouraged to meet trainer Q1 month</li> </ul> <p><i>Duration: 12 months</i><br/><i>Comparator: diet counseling only</i></p>                                                                                                                    | <p>Physiological measures:</p> <ul style="list-style-type: none"> <li>Urine protein to creatinine ratio – <i>no change at 52 weeks</i></li> <li>Symptom limited and constant work rate treadmill time – <i>significant increase in diet + exercise group at 12 but not 52 weeks</i></li> <li>Urine albumin to creatinine ratio – <i>no change</i></li> <li>eGFR – <i>no change</i></li> <li>Inflammation – <i>no change</i></li> <li>Endothelial function – <i>no change</i></li> <li>Body composition – <i>no change</i></li> </ul> |                                                                              |  |
| Montoya<br>2016<br>(27) | RCT | CKD 4                                                       | 30<br>(E = 16,<br>C = 14)<br>Age: 67.9-<br>68.3             | <ul style="list-style-type: none"> <li>General CKD knowledge</li> <li>Diet/nutrition</li> <li>Medication</li> <li>Modalities</li> <li>Other (i.e. putting affairs in order)</li> </ul> | Nephrologist,<br>nurse<br>practitioner,<br>dietician,<br>social worker | <ul style="list-style-type: none"> <li>Print</li> <li>Face to face</li> <li>PowerPoint slides</li> </ul> | <p>“Nurse practitioner facilitated CKD group visit”:</p> <ul style="list-style-type: none"> <li>Binder with section on individual labs, another section for topics of groups visits</li> <li>Six 1.5-2 hour long monthly group visits of 8 patients (~1/2 had family members with them)</li> <li>3 visits done in conjunction with nephrologist’s examinations (1<sup>st</sup> half = apt, 2<sup>nd</sup> half = education)</li> <li>3 visits = education only</li> <li>Interactive discussion at each visit</li> <li>Slide presentation (30 – 45 minutes)</li> </ul> <p><i>Duration: 9 months</i><br/><i>Comparator: standard care</i></p> | <p>Cognitions:</p> <ul style="list-style-type: none"> <li>CKD knowledge – <i>improved in both groups</i></li> <li>Self-efficacy/disease SM – <i>upward trend in E group</i></li> </ul>                                                                                                                                                                                                                                                                                                                                               |                                                                              |  |
|                         |     |                                                             |                                                             |                                                                                                                                                                                        |                                                                        |                                                                                                          |                                                                                                                                                                                                                                                                                                                                                                                                                                                                                                                                                                                                                                             |                                                                                                                                                                                                                                                                                                                                                                                                                                                                                                                                      | Individual outcomes:                                                         |  |
|                         |     |                                                             |                                                             |                                                                                                                                                                                        |                                                                        |                                                                                                          |                                                                                                                                                                                                                                                                                                                                                                                                                                                                                                                                                                                                                                             |                                                                                                                                                                                                                                                                                                                                                                                                                                                                                                                                      | <ul style="list-style-type: none"> <li>Satisfaction – <i>high</i></li> </ul> |  |
| <b>Non-RCT</b>          |     |                                                             |                                                             |                                                                                                                                                                                        |                                                                        |                                                                                                          |                                                                                                                                                                                                                                                                                                                                                                                                                                                                                                                                                                                                                                             |                                                                                                                                                                                                                                                                                                                                                                                                                                                                                                                                      |                                                                              |  |

|                                                                                  |                          |     |          |                                         |                                                                                                                                                                                                                                                 |                                                              |                                                                  |                                                                                                                                                                                                                                                                                                                                                       |                                                                                                                                                                                                                                                                                                                                                                                                                                                                                                                                                                      |                                                                                                                                                                                                                   |
|----------------------------------------------------------------------------------|--------------------------|-----|----------|-----------------------------------------|-------------------------------------------------------------------------------------------------------------------------------------------------------------------------------------------------------------------------------------------------|--------------------------------------------------------------|------------------------------------------------------------------|-------------------------------------------------------------------------------------------------------------------------------------------------------------------------------------------------------------------------------------------------------------------------------------------------------------------------------------------------------|----------------------------------------------------------------------------------------------------------------------------------------------------------------------------------------------------------------------------------------------------------------------------------------------------------------------------------------------------------------------------------------------------------------------------------------------------------------------------------------------------------------------------------------------------------------------|-------------------------------------------------------------------------------------------------------------------------------------------------------------------------------------------------------------------|
| 1<br>2<br>3<br>4<br>5<br>6<br>7<br>8<br>9<br>10<br>11<br>12<br>13<br>14          | Robinson<br>1988<br>(52) | Obs | CKD      | 25<br>Age: NR                           | <ul style="list-style-type: none"> <li>• General CKD knowledge</li> <li>• Diet/nutrition</li> <li>• Medication</li> <li>• Other (i.e. self-care activities)</li> <li>• Modalities</li> </ul>                                                    | NR                                                           | <ul style="list-style-type: none"> <li>• Face to face</li> </ul> | <p>“Renal Bingo”:</p> <ul style="list-style-type: none"> <li>• Bingo game format/ group gaming technique</li> <li>• Provision of refreshments &amp; prizes for motivation</li> <li>• Refreshments made with dietician consultation, reinforced dietary regimen</li> </ul> <p><i>Duration: one session</i><br/><i>Comparator: none</i></p>             | <p>Cognitions:</p> <ul style="list-style-type: none"> <li>• Information was gained or reinforced – <i>desirable outcome</i></li> <li>• Met a variety of learning needs – <i>desirable outcome</i></li> </ul> <hr/> <p>Intervention specific:</p> <ul style="list-style-type: none"> <li>• Participation was enjoyed – <i>desirable outcome</i></li> <li>• Interest expressed for repeating the exercise – <i>desirable outcome</i></li> </ul>                                                                                                                        | <br><br><br><br><br><br><br><br><br><br>    |
| 15<br>16<br>17<br>18<br>19<br>20<br>21<br>22<br>23<br>24<br>25<br>26<br>27       | Klang<br>1998<br>(53)    | QE  | CKD 4-5  | 56<br>(E = 28,<br>C = 28)<br>Age: 54-58 | <ul style="list-style-type: none"> <li>• General CKD knowledge</li> <li>• Diet/nutrition</li> <li>• Physical activity</li> <li>• Modalities</li> <li>• Other (i.e. psychosocial - impact of CKD on economy, family, and social life)</li> </ul> | Nurse, physician, social worker, dietician, physio-therapist | <ul style="list-style-type: none"> <li>• Face to face</li> </ul> | <p>“Pre-dialysis patient education”:</p> <ul style="list-style-type: none"> <li>• Four 2-hour sessions of group teaching with a classroom approach</li> <li>• Individual support follow-up by nephrology team member</li> </ul> <p><i>Duration: 4 sessions</i><br/><i>Comparator: standard care</i></p>                                               | <p>Individual outcomes:</p> <ul style="list-style-type: none"> <li>• Functional and emotional wellbeing – <i>better in E group*</i></li> </ul>                                                                                                                                                                                                                                                                                                                                                                                                                       |                                                                                                                                |
| 28<br>29<br>30<br>31<br>32<br>33<br>34<br>35<br>36<br>37<br>38<br>39<br>40<br>41 | Cupisiti<br>2002<br>(54) | PP  | CKD 3b-5 | 20<br>Age: NR                           | <ul style="list-style-type: none"> <li>• Diet/nutrition</li> </ul>                                                                                                                                                                              | NR                                                           | <ul style="list-style-type: none"> <li>• Print</li> </ul>        | <p>“Vegetarian diet”:</p> <ul style="list-style-type: none"> <li>• Alternate between animal based conventional low protein diet &amp; a vegetable based low protein diet</li> <li>• Booklets explaining general guidelines &amp; features of the diet</li> </ul> <p><i>Duration: one session</i><br/><i>Comparator: conventional protein diet</i></p> | <p>Individual outcomes:</p> <ul style="list-style-type: none"> <li>• Opinions on diet – <i>90% enjoyed</i></li> </ul> <hr/> <p>Physiological measures:</p> <ul style="list-style-type: none"> <li>• Creatinine – <i>no change</i></li> <li>• Albumin – <i>no change</i></li> <li>• Total protein – <i>no change</i></li> <li>• Lipids – <i>decreased</i></li> <li>• Electrolytes – <i>no change</i></li> <li>• Hematocrit – <i>no change</i></li> <li>• Urinary protein excretion – <i>decreased</i></li> <li>• Urinary urea excretion – <i>decreased</i></li> </ul> | <br><br><br><br><br><br><br><br><br><br> |

|                               |     |       |                 |                                                                                                                                                        |                                               |                                                                                                                |                                                                                                                                                                                                                                                                                                                                                                                                                                                                                 |                                                                                                                                                                                                                                                                            |                                  |  |
|-------------------------------|-----|-------|-----------------|--------------------------------------------------------------------------------------------------------------------------------------------------------|-----------------------------------------------|----------------------------------------------------------------------------------------------------------------|---------------------------------------------------------------------------------------------------------------------------------------------------------------------------------------------------------------------------------------------------------------------------------------------------------------------------------------------------------------------------------------------------------------------------------------------------------------------------------|----------------------------------------------------------------------------------------------------------------------------------------------------------------------------------------------------------------------------------------------------------------------------|----------------------------------|--|
|                               |     |       |                 |                                                                                                                                                        |                                               |                                                                                                                |                                                                                                                                                                                                                                                                                                                                                                                                                                                                                 |                                                                                                                                                                                                                                                                            | • Body weight – <i>no change</i> |  |
| Gutierrez Vilaplana 2007 (58) | PP  | CKD   | 24<br>Age: 64.5 | <ul style="list-style-type: none"> <li>• General CKD knowledge</li> <li>• Diet/nutrition</li> <li>• Modalities</li> <li>• Other</li> </ul>             | Nurse, patient volunteers                     | <ul style="list-style-type: none"> <li>• Print</li> <li>• Face to face</li> <li>• PowerPoint slides</li> </ul> | <p>“Education Intervention”</p> <ul style="list-style-type: none"> <li>• 8 2-hour classes</li> <li>• Didactic and discussion</li> </ul> <p><i>Duration: 6 months</i><br/><i>Comparator: none</i></p>                                                                                                                                                                                                                                                                            | <p>Cognitions:</p> <ul style="list-style-type: none"> <li>• Improvement in knowledge of CKD</li> </ul>                                                                                                                                                                     | ●                                |  |
|                               |     |       |                 |                                                                                                                                                        |                                               |                                                                                                                |                                                                                                                                                                                                                                                                                                                                                                                                                                                                                 | <p>Behaviors:</p> <ul style="list-style-type: none"> <li>• Modified lifestyle, diet</li> </ul>                                                                                                                                                                             | ●                                |  |
|                               |     |       |                 |                                                                                                                                                        |                                               |                                                                                                                |                                                                                                                                                                                                                                                                                                                                                                                                                                                                                 | <p>Intervention specific:</p> <ul style="list-style-type: none"> <li>• Reduction of stress, fear</li> <li>• Improvement in therapeutic relationships with healthcare providers, companions and multi-disciplinary team.</li> </ul>                                         | ●                                |  |
| Pagels 2008 (56)              | Obs | CKD   | 58<br>Age: 65   | <ul style="list-style-type: none"> <li>• General CKD knowledge</li> </ul>                                                                              | Nurse                                         | <ul style="list-style-type: none"> <li>• Print</li> </ul>                                                      | <ul style="list-style-type: none"> <li>• A diary to promote disease related knowledge, involvement and self-care ability and to promote cooperation between patient and nurse</li> </ul> <p><i>Duration: 12 months</i><br/><i>Comparator: none</i></p>                                                                                                                                                                                                                          | <p>Cognitions:</p> <ul style="list-style-type: none"> <li>• Participation, self-care, and disease related knowledge</li> </ul>                                                                                                                                             | ●                                |  |
|                               |     |       |                 |                                                                                                                                                        |                                               |                                                                                                                |                                                                                                                                                                                                                                                                                                                                                                                                                                                                                 | <p>Intervention specific:</p> <ul style="list-style-type: none"> <li>• Use of diary</li> <li>• Suitability for teaching purposes</li> </ul>                                                                                                                                | ●                                |  |
| Yen 2008 (57)                 | PP  | CKD 3 | 66<br>Age: 67.4 | <ul style="list-style-type: none"> <li>• General CKD knowledge</li> <li>• Diet/nutrition</li> <li>• Physical activity</li> <li>• Medication</li> </ul> | Nephrologist, nurse, dietician, social worker | <ul style="list-style-type: none"> <li>• Print</li> <li>• Face to face</li> <li>• Telephone</li> </ul>         | <p>“Educational intervention”:</p> <ul style="list-style-type: none"> <li>• Handouts</li> <li>• One 150 min workshop</li> <li>• Individual consults Q6 month with nurse</li> <li>• Phone number provided to participants for questions</li> <li>• Desserts recommended by dietician given at workshop for educational purposes, lunch boxes designed by dietician given out at the end of the workshop</li> </ul> <p><i>Duration: 12 months</i><br/><i>Comparator: None</i></p> | <p>Cognitions:</p> <ul style="list-style-type: none"> <li>• QOL (WHOQOL-BREF Taiwan version) – <i>global increase</i></li> <li>• Knowledge of renal function protection (checklist made by investigators) – <i>no change</i></li> </ul>                                    | ●                                |  |
|                               |     |       |                 |                                                                                                                                                        |                                               |                                                                                                                |                                                                                                                                                                                                                                                                                                                                                                                                                                                                                 | <p>Physiological measures:</p> <ul style="list-style-type: none"> <li>• Creatinine – <i>no change</i></li> <li>• BUN – <i>no change</i></li> <li>• GFR – <i>no change</i></li> <li>• Body weight – <i>no change</i></li> <li>• Muscle weight – <i>no change</i></li> </ul> | ●                                |  |

|                               |    |         |                                             |                                                                                                                                                                                                                                           |                                                                       |                                                                                   |                                                                                                                                                                                                                                                                                                                                                                                          |                                                                                                                                                                                                                                                                                                                                                         |                                                                                                                                                                             |
|-------------------------------|----|---------|---------------------------------------------|-------------------------------------------------------------------------------------------------------------------------------------------------------------------------------------------------------------------------------------------|-----------------------------------------------------------------------|-----------------------------------------------------------------------------------|------------------------------------------------------------------------------------------------------------------------------------------------------------------------------------------------------------------------------------------------------------------------------------------------------------------------------------------------------------------------------------------|---------------------------------------------------------------------------------------------------------------------------------------------------------------------------------------------------------------------------------------------------------------------------------------------------------------------------------------------------------|-----------------------------------------------------------------------------------------------------------------------------------------------------------------------------|
|                               |    |         |                                             |                                                                                                                                                                                                                                           |                                                                       |                                                                                   |                                                                                                                                                                                                                                                                                                                                                                                          | <ul style="list-style-type: none"> <li>• % Body fat – <i>no change</i></li> <li>• Waist to hip ratio – <i>significant decrease in E group</i></li> <li>• BMI – <i>significant decrease in E group</i></li> <li>• BP – <i>no change</i></li> </ul>                                                                                                       |                                                                                                                                                                             |
| Gutierrez Vilaplana 2009 (55) | PP | CKD 4-5 | 41<br>Age: 60.56                            | <ul style="list-style-type: none"> <li>• General CKD knowledge</li> <li>• Diet/nutrition</li> <li>• Physical activity</li> <li>• Modalities</li> <li>• Other (i.e. psychosocial - impact of CKD family, finances, social life)</li> </ul> | Nurse, physician, technician, 3 expert patients                       | <ul style="list-style-type: none"> <li>• Print</li> <li>• Face to face</li> </ul> | <p>“Teaching group”:</p> <ul style="list-style-type: none"> <li>• Six 2-hour monthly group education sessions</li> <li>• Booklet for future reference</li> </ul> <p><i>Duration: 6 months</i><br/><i>Comparator: None</i></p>                                                                                                                                                            | <p>Cognitions:</p> <ul style="list-style-type: none"> <li>• Anxiety – <i>decreased</i></li> <li>• Fear – <i>more control of fear response</i></li> <li>• Stress – <i>decreased</i></li> </ul>                                                                                                                                                           |                                                                                          |
| Wu 2009 (59)                  | QE | CKD 3-5 | 573<br>(E = 287, Cohort = 286)<br>Age: 63.4 | <ul style="list-style-type: none"> <li>• General CKD knowledge</li> <li>• Diet/nutrition</li> <li>• Medication</li> <li>• Lifestyle</li> </ul>                                                                                            | Nurse, social worker, dietician, HD/PD patient volunteers, physicians | <ul style="list-style-type: none"> <li>• Face to face</li> </ul>                  | <p>“Multidisciplinary pre-dialysis education (MPE)”:</p> <ul style="list-style-type: none"> <li>• Individual lectures, content based on CKD stage</li> <li>• Dietary counseling biannually</li> </ul> <p><i>Duration: 12 months</i><br/><i>Comparator: standard care</i></p>                                                                                                             | <p>Health status:</p> <ul style="list-style-type: none"> <li>• ESRD warranting RRT – <i>13.9% in E group vs 43% in C group</i></li> <li>• All cause mortality – <i>1.7% in E group vs 10.1% in C group</i></li> </ul> <p>Health care:</p> <ul style="list-style-type: none"> <li>• Hospitalization – <i>2.8% E group vs 16.4% in C group</i></li> </ul> | <br> |
| Wierdsma 2011 (60)            | QE | CKD     | 54<br>(E = 28, C = 26)<br>Age: 55-59        | <ul style="list-style-type: none"> <li>• Medication</li> </ul>                                                                                                                                                                            | Nurse practitioner                                                    | <ul style="list-style-type: none"> <li>• Face to face</li> <li>• Print</li> </ul> | <p>“Motivational interviewing”:</p> <ul style="list-style-type: none"> <li>• Counseling by nurse practitioner (in addition to care by nephrologist) using motivational interviewing</li> <li>• Using the “Long-Term Medication Behavior Self-Efficacy Scale (LTMBSES)” – areas with score &lt;5 were identified and then up to 5 areas (picked by patient) were discussed and</li> </ul> | <p>Cognitions:</p> <ul style="list-style-type: none"> <li>• LTMBSES – <i>difference in mean self-efficacy score at post-test</i></li> </ul>                                                                                                                                                                                                             |                                                                                        |



|                           |     |         |                                                      |                                                                                                                                                                                                                             |                                                                                                           |                                                                                                        |                                                                                                                                                                                                                                                                                                                                            |                                                                                                                                                                                                                                                                         |  |
|---------------------------|-----|---------|------------------------------------------------------|-----------------------------------------------------------------------------------------------------------------------------------------------------------------------------------------------------------------------------|-----------------------------------------------------------------------------------------------------------|--------------------------------------------------------------------------------------------------------|--------------------------------------------------------------------------------------------------------------------------------------------------------------------------------------------------------------------------------------------------------------------------------------------------------------------------------------------|-------------------------------------------------------------------------------------------------------------------------------------------------------------------------------------------------------------------------------------------------------------------------|--|
|                           |     |         |                                                      |                                                                                                                                                                                                                             |                                                                                                           |                                                                                                        | solutions and goals were set<br><i>Duration:</i> 6 months<br><i>Comparator:</i> standard care                                                                                                                                                                                                                                              |                                                                                                                                                                                                                                                                         |  |
| Aguilera Florez 2012 (61) | Obs | CKD     | 19<br>Age: 58                                        | <ul style="list-style-type: none"> <li>• General CKD knowledge</li> <li>• Diet/nutrition</li> <li>• Medication</li> <li>• Symptom management</li> <li>• Physical activity</li> <li>• Modalities</li> <li>• Other</li> </ul> | Nurse, physio-therapist, dietician, pharmacist, psychologist, coordinators, nephrologist, patient mentors | <ul style="list-style-type: none"> <li>• Face to face</li> </ul>                                       | <p>“Escuela ERCA”:</p> <ul style="list-style-type: none"> <li>• 7 1.5-hour multi-disciplinary group education sessions held biweekly</li> <li>• Up to 10 patients per group with family members</li> <li>• Didactic plus discussion format</li> </ul> <p><i>Duration:</i> Not reported<br/><i>Comparator:</i> None</p>                     | <p>Cognitions:</p> <ul style="list-style-type: none"> <li>• Knowledge</li> <li>• Anxiety - <i>increased</i></li> </ul>                                                                                                                                                  |  |
| Choi 2012 (62)            | QE  | CKD 1-5 | 61<br>(E = 31,<br>C = 30)<br>Age:<br>53.93-<br>58.33 | <ul style="list-style-type: none"> <li>• General CKD knowledge</li> <li>• Diet/nutrition</li> <li>• Modalities</li> <li>• Other (i.e. understanding and compliance with SM)</li> </ul>                                      | Physician, nurse, dietician                                                                               | <ul style="list-style-type: none"> <li>• Face to face</li> <li>• PowerPoint slides</li> </ul>          | <p>“Face-to-face SM program”:</p> <ul style="list-style-type: none"> <li>• 90 minute lecture with slides (3 – 5 people/group)</li> <li>• 20 minute individual consult</li> <li>• 1 week later individual reinforcement education and consultation</li> </ul> <p><i>Duration:</i> 2 sessions<br/><i>Comparator:</i> general maintenance</p> | <p>Cognitions:</p> <ul style="list-style-type: none"> <li>• Knowledge of CKD scale – <i>increase &gt; in E group</i></li> </ul>                                                                                                                                         |  |
|                           |     |         |                                                      |                                                                                                                                                                                                                             |                                                                                                           |                                                                                                        |                                                                                                                                                                                                                                                                                                                                            | <p>Behaviors:</p> <ul style="list-style-type: none"> <li>• Self-care practice scale for CKD patients – <i>no difference between E group and C group but did increase over time for both groups</i></li> </ul>                                                           |  |
|                           |     |         |                                                      |                                                                                                                                                                                                                             |                                                                                                           |                                                                                                        |                                                                                                                                                                                                                                                                                                                                            | <p>Physiological measures:</p> <ul style="list-style-type: none"> <li>• BUN/Creatinine – <i>no change</i></li> <li>• Na/K – <i>no change</i></li> <li>• Ca/PO4 – <i>no change</i></li> <li>• Hemoglobin – <i>no change</i></li> <li>• GFR – <i>no change</i></li> </ul> |  |
| Kao 2012 (24)             | QE  | CKD 1-4 | 94<br>(E = 45,<br>C = 49)<br>Age:<br>73.17           | <ul style="list-style-type: none"> <li>• General CKD knowledge</li> <li>• Physical activity</li> </ul>                                                                                                                      | Instructor                                                                                                | <ul style="list-style-type: none"> <li>• Print</li> <li>• Face to face</li> <li>• Telephone</li> </ul> | <p>“Exercise education intervention”:</p> <ul style="list-style-type: none"> <li>• Manual</li> <li>• 1.5 hour exercise/ health education course</li> <li>• Drafted exercise contract &amp;</li> </ul>                                                                                                                                      | <p>Behaviors:</p> <ul style="list-style-type: none"> <li>• Exercise behavior – <i>improved in E group</i></li> </ul>                                                                                                                                                    |  |

|                       |    |                                |                |                                                                                                                                                 |             |                                                                                                                         |                                                                                                                                                                                                                                                                                                                                                                                                                            |                                                                                                                                                                                                                                                                                                                                                                                                                                                 |                                                                                       |
|-----------------------|----|--------------------------------|----------------|-------------------------------------------------------------------------------------------------------------------------------------------------|-------------|-------------------------------------------------------------------------------------------------------------------------|----------------------------------------------------------------------------------------------------------------------------------------------------------------------------------------------------------------------------------------------------------------------------------------------------------------------------------------------------------------------------------------------------------------------------|-------------------------------------------------------------------------------------------------------------------------------------------------------------------------------------------------------------------------------------------------------------------------------------------------------------------------------------------------------------------------------------------------------------------------------------------------|---------------------------------------------------------------------------------------|
|                       |    |                                |                |                                                                                                                                                 |             |                                                                                                                         | <p>exercise programs</p> <ul style="list-style-type: none"> <li>• Follow up phone calls</li> <li>• 1x/month for patients in maintenance phase</li> <li>• 2x/month for patients in action/ prep stages</li> <li>• 4x/month for patients at pre-contemplation/ contemplation stages</li> <li>• Goal: workout 3-5x/week x 30min for 3 months</li> </ul> <p><i>Duration: 4 months</i><br/><i>Comparator: standard care</i></p> | <p>Cognitions:</p> <ul style="list-style-type: none"> <li>• Depression – <i>score decreased (i.e. improved) in E group</i></li> </ul>                                                                                                                                                                                                                                                                                                           |    |
|                       |    |                                |                |                                                                                                                                                 |             |                                                                                                                         |                                                                                                                                                                                                                                                                                                                                                                                                                            | <p>Symptom management:</p> <ul style="list-style-type: none"> <li>• Fatigue - <i>score decreased in E group</i></li> </ul>                                                                                                                                                                                                                                                                                                                      |    |
| Diamantidis 2013 (63) | PP | CKD 3-5                        | 108<br>Age: 64 | <ul style="list-style-type: none"> <li>• Diet/nutrition</li> <li>• Medication</li> </ul>                                                        | Online tool | <ul style="list-style-type: none"> <li>• Website</li> </ul>                                                             | <p>“Disease-specific safety information”:</p> <ul style="list-style-type: none"> <li>• Safe kidney care website – patient/family member and provider portals</li> <li>• Education modules displayed in circular distribution to avoid prioritization of topics</li> </ul> <p><i>Duration: Not applicable</i><br/><i>Comparator: None</i></p>                                                                               | <p>Intervention specific:</p> <ul style="list-style-type: none"> <li>• First entry into website - <i>&lt;30% of participants entered within 365 days (total follow up period)</i></li> <li>• Average dwell time on the website – <i>7 minutes</i></li> <li>• Modules were ranked by frequency of selection - <i>The three most frequently visited pages were “Renal function calculator”, “Pills to avoid”, and “Foods to avoid”</i></li> </ul> |    |
| Kazawa 2013 (28)      | PP | CKD 3-4 (diabetic nephropathy) | 30<br>Age: 67  | <ul style="list-style-type: none"> <li>• Diet/nutrition</li> <li>• Medications</li> <li>• Physical activity</li> <li>• Comorbidities</li> </ul> | Nurse       | <ul style="list-style-type: none"> <li>• Print</li> <li>• Face to face</li> <li>• Telephone</li> <li>• Email</li> </ul> | <p>“SM skills program”:</p> <ul style="list-style-type: none"> <li>• Textbook</li> <li>• Daily journal</li> <li>• Four 1-hour face-to-face sessions Q2 weeks at outpatient clinic or</li> </ul>                                                                                                                                                                                                                            | <p>Individual outcomes:</p> <ul style="list-style-type: none"> <li>• QOL – <i>self-efficacy and SM behaviors improved</i></li> </ul>                                                                                                                                                                                                                                                                                                            |  |

1  
2  
3  
4  
5  
6  
7  
8  
9  
10  
11  
12  
13  
14  
15  
16  
17  
18  
19  
20  
21  
22  
23  
24  
25  
26  
27  
28  
29  
30  
31  
32  
33  
34  
35  
36  
37  
38  
39  
40  
41  
42  
43  
44  
45  
46  
47

|                  |    |          |                      |                                                                                                                                                            |             |                                                                                              |                                                                                                                                                                                                                                                                                                                                                                                                                  |                                                                                                                                                                                                                                                                                  |  |
|------------------|----|----------|----------------------|------------------------------------------------------------------------------------------------------------------------------------------------------------|-------------|----------------------------------------------------------------------------------------------|------------------------------------------------------------------------------------------------------------------------------------------------------------------------------------------------------------------------------------------------------------------------------------------------------------------------------------------------------------------------------------------------------------------|----------------------------------------------------------------------------------------------------------------------------------------------------------------------------------------------------------------------------------------------------------------------------------|--|
|                  |    |          |                      | <ul style="list-style-type: none"> <li>Other (i.e. stress management, identify supporters (family) &amp; how they can contribute, goal setting)</li> </ul> |             |                                                                                              | <p>in home</p> <ul style="list-style-type: none"> <li>Two 30 minute phone or email sessions Q1 month</li> <li>Then Q1 month phone calls</li> </ul> <p><i>Duration: 6 months</i><br/><i>Comparator: None</i></p>                                                                                                                                                                                                  | <p>Physiological measures:</p> <ul style="list-style-type: none"> <li>Renal function – <i>no change</i></li> <li>Hemoglobin A1c – <i>decreased post intervention</i></li> </ul>                                                                                                  |  |
| Lin 2013 (64)    | PP | CKD 1-3a | 37<br>Age 67.42      | <ul style="list-style-type: none"> <li>Other (i.e. self-regulation/ self-management topics)</li> </ul>                                                     | Nurse       | <ul style="list-style-type: none"> <li>Print</li> <li>Face to face</li> <li>Video</li> </ul> | <p>“SM program”:</p> <ul style="list-style-type: none"> <li>Self-monitoring workbook</li> <li>5 week SM program</li> <li>Weekly 90 minute face- to-face group sessions (6-8 patients)</li> <li>CKD SM video about self-regulation</li> </ul> <p><i>Duration: 5 weeks</i><br/><i>Comparator: None</i></p>                                                                                                         | <p>Cognitions:</p> <ul style="list-style-type: none"> <li>CKD self-efficacy – <i>increased</i></li> </ul>                                                                                                                                                                        |  |
|                  |    |          |                      |                                                                                                                                                            |             |                                                                                              |                                                                                                                                                                                                                                                                                                                                                                                                                  | <p>Behaviors:</p> <ul style="list-style-type: none"> <li>CKD SM – <i>no change</i></li> </ul>                                                                                                                                                                                    |  |
|                  |    |          |                      |                                                                                                                                                            |             |                                                                                              |                                                                                                                                                                                                                                                                                                                                                                                                                  | <p>Physiological measures:</p> <ul style="list-style-type: none"> <li>Creatinine – <i>marginally significant decrease</i></li> <li>GFR – <i>remained stable</i></li> </ul>                                                                                                       |  |
| Murali 2013 (25) | PP | CKD 4    | 12<br>Age: 68        | <ul style="list-style-type: none"> <li>Diet/nutrition</li> </ul>                                                                                           | Online tool | <ul style="list-style-type: none"> <li>Website</li> </ul>                                    | <p>“Dietary assessment and evaluation tool”:</p> <ul style="list-style-type: none"> <li>Self-administered</li> <li>Obtains 24 hour food history</li> <li>Then evaluates diet based on KDOQI GL</li> <li>Then share general tips for success</li> <li>A report is generated for the nephrologist to guide discussion with patients</li> </ul> <p><i>Duration: single exposure</i><br/><i>Comparator: None</i></p> | <p>Cognitions:</p> <ul style="list-style-type: none"> <li>Change in patients’ self-efficacy to adhere to KDOQI GL after single exposure to the tool – <i>3 worsened, 3 improved, 6 no change</i></li> </ul>                                                                      |  |
|                  |    |          |                      |                                                                                                                                                            |             |                                                                                              |                                                                                                                                                                                                                                                                                                                                                                                                                  | <p>Intervention specific:</p> <ul style="list-style-type: none"> <li>Tool acceptability – <i>well accepted</i></li> <li>Congruence of patient and provider attitudes – <i>incongruence in 4/10 cases where provider states used report but patient doesn’t verify</i></li> </ul> |  |
| Nauta 2013 (29)  | PP | CKD      | 22<br>Age: 55.2-59.8 | <ul style="list-style-type: none"> <li>Diet/nutrition</li> <li>Physical</li> </ul>                                                                         | Online tool | <ul style="list-style-type: none"> <li>Print</li> <li>Website</li> </ul>                     | <p>“Lifestyle management tool”:</p> <ul style="list-style-type: none"> <li>33-page quick start guide provided</li> </ul>                                                                                                                                                                                                                                                                                         | <p>Cognitions:</p> <ul style="list-style-type: none"> <li>Self-efficacy – <i>limited effectiveness</i></li> </ul>                                                                                                                                                                |  |

|                        |    |                                                             |                                  |                                                                                                                                                                              |                           |                                                                               |                                                                                                                                                                                                                                                                                                                                                                                                                                                        |                                                                                                                                                                                                  |                                                                                       |
|------------------------|----|-------------------------------------------------------------|----------------------------------|------------------------------------------------------------------------------------------------------------------------------------------------------------------------------|---------------------------|-------------------------------------------------------------------------------|--------------------------------------------------------------------------------------------------------------------------------------------------------------------------------------------------------------------------------------------------------------------------------------------------------------------------------------------------------------------------------------------------------------------------------------------------------|--------------------------------------------------------------------------------------------------------------------------------------------------------------------------------------------------|---------------------------------------------------------------------------------------|
|                        |    |                                                             |                                  | <ul style="list-style-type: none"> <li>activity</li> <li>Lifestyle</li> </ul>                                                                                                |                           |                                                                               | <ul style="list-style-type: none"> <li>Patients had access to site for 4 months – patient choice to frequency of visits to website</li> <li><i>Duration</i>: 4 months</li> <li><i>Comparator</i>: None</li> </ul>                                                                                                                                                                                                                                      | Behaviors: <ul style="list-style-type: none"> <li>SM – <i>limited effectiveness</i></li> </ul>                                                                                                   |    |
| Thomas 2013 (30)       | MM | Diabetic nephropathy (DM + micro-albuminuria)               | 176 (E = 116, C = 60)<br>Age: NR | <ul style="list-style-type: none"> <li>General CKD knowledge</li> <li>Comorbidities</li> <li>Lifestyle</li> </ul>                                                            | NR                        | <ul style="list-style-type: none"> <li>Print</li> <li>DVD</li> </ul>          | “SM package”: <ul style="list-style-type: none"> <li>Written materials</li> <li>20 minute DVD</li> <li>Self-monitoring diary</li> <li>Fridge magnet with key messages</li> <li>BP monitor if needed</li> </ul> <i>Duration</i> : One session<br><i>Comparator</i> : standard care                                                                                                                                                                      | Physiological measures: <ul style="list-style-type: none"> <li>BP – <i>no statistically sig difference</i></li> <li>Hemoglobin A1c – <i>no change</i></li> <li>BMI – <i>no change</i></li> </ul> |    |
| Walker 2013 (65)       | PP | CKD with high risk of progression + DM2 + HTN + albuminuria | 52<br>Age: 57.5                  | <ul style="list-style-type: none"> <li>Diet/nutrition</li> <li>Medication</li> <li>Symptom management</li> <li>Physical activity</li> <li>Other (i.e. compliance)</li> </ul> | Nurse, nurse practitioner | <ul style="list-style-type: none"> <li>Print</li> <li>Face to face</li> </ul> | “Nurse practitioner intervention in primary care setting”: <ul style="list-style-type: none"> <li>SM booklet</li> <li>Initial assessment of lifestyle behaviors, SM practice, health/medication knowledge</li> <li>Individual education</li> <li>Individualized patient management plan given at end of 12 weeks</li> <li>Q2 week 30 minute long assessments &amp; review x 12 weeks</li> </ul> <i>Duration</i> : 12 weeks<br><i>Comparator</i> : None | Behaviors: <ul style="list-style-type: none"> <li>SM (Partners in Health (PIH) instrument) – <i>had change in certain domains</i></li> </ul>                                                     |    |
| Wright Nunes 2013 (66) | QE | CKD 1-5                                                     | 556 (E = 155, Cohort = 401)      | <ul style="list-style-type: none"> <li>General CKD knowledge</li> <li>Diet/nutrition</li> </ul>                                                                              | Nephrology fellows        | <ul style="list-style-type: none"> <li>Print</li> <li>Face to face</li> </ul> | “Physician-delivered education too” <ul style="list-style-type: none"> <li>1-page intervention worksheet delivered during clinic visits –</li> </ul>                                                                                                                                                                                                                                                                                                   | Cognitions: <ul style="list-style-type: none"> <li>Kidney specific knowledge – <i>associated with increase in knowledge</i></li> </ul>                                                           |  |

1  
2  
3  
4  
5  
6  
7  
8  
9  
10  
11  
12  
13  
14  
15  
16  
17  
18  
19  
20  
21  
22  
23  
24  
25  
26  
27  
28  
29  
30  
31  
32  
33  
34  
35  
36  
37  
38  
39  
40  
41  
42  
43  
44  
45  
46  
47

|                   |    |                                                             |                                   |                                                                                                                                                                                                        |                                                                     |                                                                     |                                                                                                                                                                                                |                                                                                                                                                                                                                                                                                                                                            |  |
|-------------------|----|-------------------------------------------------------------|-----------------------------------|--------------------------------------------------------------------------------------------------------------------------------------------------------------------------------------------------------|---------------------------------------------------------------------|---------------------------------------------------------------------|------------------------------------------------------------------------------------------------------------------------------------------------------------------------------------------------|--------------------------------------------------------------------------------------------------------------------------------------------------------------------------------------------------------------------------------------------------------------------------------------------------------------------------------------------|--|
|                   |    |                                                             | Age: 57                           | <ul style="list-style-type: none"> <li>• Medication</li> <li>• Physical activity</li> <li>• Lifestyle</li> <li>• Comorbidities</li> <li>• Other (i.e. compliance)</li> </ul>                           |                                                                     |                                                                     | take 1-2 minutes to administer<br><i>Duration:</i> one session<br><i>Comparator:</i> "historical group" – who developed sheet                                                                  | Intervention specific:<br><ul style="list-style-type: none"> <li>• Feasibility of intervention – <i>physicians found it useful and efficient but had concern regarding some of the talking points</i></li> </ul>                                                                                                                           |  |
| Walker 2014 (21)  | PP | CKD with high risk of progression + DM2 + HTN + albuminuria | 52<br>Age: 57.5                   | <ul style="list-style-type: none"> <li>• See Walker (65)</li> </ul>                                                                                                                                    | Nurse, nurse practitioner                                           | <ul style="list-style-type: none"> <li>• See Walker (65)</li> </ul> | <ul style="list-style-type: none"> <li>• See Walker (65)</li> </ul>                                                                                                                            | Physiological measures:<br><ul style="list-style-type: none"> <li>• Albuminuria – <i>improved</i></li> <li>• GFR – <i>no change</i></li> <li>• 5 year absolute cardiovascular risk – <i>improved</i></li> <li>• BP – <i>improved</i></li> <li>• Total cholesterol – <i>improved</i></li> <li>• Hemoglobin A1c – <i>improved</i></li> </ul> |  |
|                   |    |                                                             |                                   |                                                                                                                                                                                                        |                                                                     |                                                                     |                                                                                                                                                                                                | Cognitions:<br><ul style="list-style-type: none"> <li>• Knowledge of medications/ conditions – <i>improved</i></li> </ul>                                                                                                                                                                                                                  |  |
|                   |    |                                                             |                                   |                                                                                                                                                                                                        |                                                                     |                                                                     |                                                                                                                                                                                                | Behaviors:<br><ul style="list-style-type: none"> <li>• Medication adherence, adherence to healthy lifestyle – <i>improved</i></li> </ul>                                                                                                                                                                                                   |  |
| Enworom 2015 (67) | QE | CKD 1-4                                                     | 49<br>(E = 25, C = 24)<br>Age: 73 | <ul style="list-style-type: none"> <li>• General CKD knowledge</li> <li>• Symptoms management</li> <li>• Modalities</li> <li>• Comorbidities</li> <li>• Other (i.e. advanced care planning)</li> </ul> | Nurse practitioner, physician assistants, clinical nurse specialist | <ul style="list-style-type: none"> <li>• Face to face</li> </ul>    | "Kidney Disease Education (KDE)"<br><ul style="list-style-type: none"> <li>• 6 education classes on one on one or group basis</li> </ul> <i>Duration:</i> unclear<br><i>Comparator:</i> no KDE | Physiological measures:<br><ul style="list-style-type: none"> <li>• GFR decline – <i>slower in E group</i></li> <li>• Hemoglobin – <i>E group maintained more stable level compared to non-KDE group who lost 1g/dL from baseline</i></li> </ul>                                                                                           |  |
|                   |    |                                                             |                                   |                                                                                                                                                                                                        |                                                                     |                                                                     |                                                                                                                                                                                                | Cognitions:<br><ul style="list-style-type: none"> <li>• Kidney disease knowledge (KiKS survey) – <i>no change</i></li> </ul>                                                                                                                                                                                                               |  |

|                                                                                                          |                          |     |          |                                                |                                                                                                                                                                                                                                                        |                    |                                                                                                                             |                                                                                                                                                                                                                                                                                                                                                                                                                                                                                 |                                                                                                                                                                                                                                                                                                          |  |
|----------------------------------------------------------------------------------------------------------|--------------------------|-----|----------|------------------------------------------------|--------------------------------------------------------------------------------------------------------------------------------------------------------------------------------------------------------------------------------------------------------|--------------------|-----------------------------------------------------------------------------------------------------------------------------|---------------------------------------------------------------------------------------------------------------------------------------------------------------------------------------------------------------------------------------------------------------------------------------------------------------------------------------------------------------------------------------------------------------------------------------------------------------------------------|----------------------------------------------------------------------------------------------------------------------------------------------------------------------------------------------------------------------------------------------------------------------------------------------------------|--|
| 1<br>2<br>3<br>4<br>5<br>6<br>7<br>8<br>9<br>10<br>11<br>12<br>13<br>14<br>15<br>16<br>17<br>18          | Vann<br>2015<br>(26)     | PP  | CKD 3b-4 | 9<br>Age:<br>mean NR                           | <ul style="list-style-type: none"> <li>• General CKD knowledge</li> <li>• Diet/nutrition</li> <li>• Symptom management</li> <li>• Modalities</li> <li>• Comorbidities</li> <li>• Other (i.e. self-care management strategies and behaviors)</li> </ul> | Nurse practitioner | <ul style="list-style-type: none"> <li>• Print</li> <li>• Website</li> <li>• Face to face</li> <li>• White board</li> </ul> | <p>“CKD Education Program”</p> <ul style="list-style-type: none"> <li>• CKD education sessions</li> <li>• Assessment of readiness to change</li> <li>• CKD toolkit individualized for each participant</li> <li>• Collaborative goal setting between nurse practitioner and patient</li> <li>• Information booklet with websites listed</li> <li>• Patients met with nurse practitioner for 60 min</li> </ul> <p><i>Duration:</i> over 6 visits<br/><i>Comparator:</i> none</p> | <p>Cognitions:</p> <ul style="list-style-type: none"> <li>• CKD related knowledge – <i>improved</i></li> </ul>                                                                                                                                                                                           |  |
| 19<br>20<br>21<br>22<br>23<br>24<br>25<br>26<br>27<br>28<br>29<br>30<br>31<br>32<br>33<br>34<br>35<br>36 | Cupisiti<br>2016<br>(68) | Obs | CKD 3b-5 | 823<br>(E = 305,<br>C = 518)<br>Age: 69-<br>74 | <ul style="list-style-type: none"> <li>• Diet/nutrition</li> </ul>                                                                                                                                                                                     | Dietician          | <ul style="list-style-type: none"> <li>• Face to face</li> </ul>                                                            | <p>“Nutritional Treatment”</p> <ul style="list-style-type: none"> <li>• Renal dietician assessed dietary habits using 3 day dietary recall &amp; performed an intervention tailored to the needs/clinical features of the patient</li> <li>• Progressed from “normal” diet → low protein diet → very low protein diet depending on needs</li> </ul> <p><i>Duration:</i> at least 6 months<br/><i>Comparator:</i> standard care</p>                                              | <p>Physiological measures:</p> <ul style="list-style-type: none"> <li>• Phosphaturia – <i>lower in E group</i></li> </ul>                                                                                                                                                                                |  |
|                                                                                                          |                          |     |          |                                                |                                                                                                                                                                                                                                                        |                    |                                                                                                                             |                                                                                                                                                                                                                                                                                                                                                                                                                                                                                 | <p>Health care:</p> <ul style="list-style-type: none"> <li>• Furosemide use – <i>lower in E group</i></li> <li>• Calcium free phosphate bind use – <i>lower in E group</i></li> <li>• ESA use – <i>lower in E group</i></li> <li>• Active vitamin D preparation use – <i>lower in E group</i></li> </ul> |  |
|                                                                                                          |                          |     |          |                                                |                                                                                                                                                                                                                                                        |                    |                                                                                                                             |                                                                                                                                                                                                                                                                                                                                                                                                                                                                                 | <p>Individual outcomes:</p> <ul style="list-style-type: none"> <li>• Dietary satisfaction questionnaire – <i>majority of E group patients were satisfied with their diet</i></li> </ul>                                                                                                                  |  |
| 37<br>38<br>39<br>40<br>41<br>42<br>43<br>44<br>45<br>46<br>47                                           | Ong<br>2016<br>(69)      | PP  | CKD 4-5  | 45<br>Age: 59.4                                | <ul style="list-style-type: none"> <li>• Medications</li> <li>• Symptom management</li> <li>• Comorbidities</li> </ul>                                                                                                                                 | Mobile application | <ul style="list-style-type: none"> <li>• Smart phone application</li> </ul>                                                 | <p>“Smartphone based SM system”</p> <ul style="list-style-type: none"> <li>• Application generated personalized patient messages based on pre-built algorithms</li> </ul>                                                                                                                                                                                                                                                                                                       | <p>Physiological measures:</p> <ul style="list-style-type: none"> <li>• BP – <i>change in home BP readings</i></li> </ul>                                                                                                                                                                                |  |

1  
2  
3  
4  
5  
6  
7  
8  
9  
10  
11  
12  
13  
14  
15  
16  
17  
18  
19  
20  
21  
22  
23  
24  
25  
26  
27  
28  
29  
30  
31  
32  
33  
34  
35  
36  
37  
38  
39  
40  
41  
42  
43  
44  
45  
46  
47

|                          |     |                                                                         |               |                                     |                               |                    |                                                      |                                                                                   |                                                                                     |
|--------------------------|-----|-------------------------------------------------------------------------|---------------|-------------------------------------|-------------------------------|--------------------|------------------------------------------------------|-----------------------------------------------------------------------------------|-------------------------------------------------------------------------------------|
|                          |     |                                                                         |               | • Other (i.e. tracking lab results) |                               |                    | <i>Duration: 6 months</i><br><i>Comparator: none</i> | Intervention specific:<br>• Medications – 127 medication discrepancies identified |  |
| Penaloza-Ramos 2016 (22) | Obs | HTN (BP>130/80) + CKD stage 3 or CVA/TIA or DM or MI or angina, or CABG | NR<br>Age: NA | • See McManus (48)                  | General practitioner, patient | • See McManus (48) | • See McManus (48)                                   | Health care:<br>• Cost effective – yes                                            |  |

Abbreviations: BP – blood pressure; E – experimental; C – control; CHD – coronary heart disease; CHEERS – Controlling Hypertension: Education and Empowerment Renal Study; DM – diabetes mellitus; HTN – hypertension; NR – not reported; RRT – renal replacement therapy; TIA – transient ischemic attack; QOL – quality of life; RCT = randomized controlled trial; QE = quasi-experimental; PP = pre-post intervention; Obs = observational; MM = mixed methods; SM – self-management

- Key:
-  Not applicable
  -  Outcome improved post intervention
  -  Outcome worsened post intervention
  -  Outcome unchanged post intervention
  -  Outcome had mixed results (some improved and/or some worsened and/or some did not change)

**Table 5.** Summary of qualitative studies

| Study (Reference) | Target population                      | Number of participants | Aim/Intervention                                                                                                                                                                                                                                                                                  | Methods                                                        | Summary of findings                                                                                                                                                                                                                                                                                                                                                                                                                                                                                                                                                              |
|-------------------|----------------------------------------|------------------------|---------------------------------------------------------------------------------------------------------------------------------------------------------------------------------------------------------------------------------------------------------------------------------------------------|----------------------------------------------------------------|----------------------------------------------------------------------------------------------------------------------------------------------------------------------------------------------------------------------------------------------------------------------------------------------------------------------------------------------------------------------------------------------------------------------------------------------------------------------------------------------------------------------------------------------------------------------------------|
| Blickem (18)      | CKD Stage 3                            | 20                     | <p>“To explore the experience of patient-led assessment for network support (PLANS) from the perspectives of participants and telephone support workers.” (p.1)</p> <p>Intervention: see Table 4 Blakeman (47)</p>                                                                                | Interviews and focus groups: No analytic methodology discussed | <ul style="list-style-type: none"> <li>• Mixed reception from participants</li> <li>• Formulation of “health” in everyday life (i.e. participants unaware of having CKD or its significance - confused about relevance of PLANS)</li> <li>• Trajectories and tipping points (i.e. engagement in PLANS depended on participants’ stage of life – either could influence trying new things or disrupt routines)</li> <li>• Trust in networks (i.e. unwillingness to seek support, intrusive, others saw improved awareness/access to local resources; tailored support)</li> </ul> |
| Heiden (70)       | CKD pre-dialysis, dialysis, transplant | 5                      | <p>To identify participant’s perspective regarding a “web application prototype to help make decisions regarding diet restrictions and phosphate binder dosage.” (p.544)</p> <p>Intervention: Website tool for patients that included 3 components – diet/fluid education; diet registry; and</p> | Interviews: no analytic methodology discussed                  | <ul style="list-style-type: none"> <li>• Benefits: <ul style="list-style-type: none"> <li>○ Education tool increased insight and understanding</li> <li>○ Assisted in tracking and choosing best food alternative</li> <li>○ Decision support for binder dosage</li> </ul> </li> <li>• Limitations: <ul style="list-style-type: none"> <li>○ Targeted users familiar with using computers</li> <li>○ Users had different information needs</li> <li>○ One-way communication</li> <li>○ Need self-care resources in place to carry out recommendations</li> </ul> </li> </ul>     |



1  
2  
3  
4  
5  
6  
7  
8  
9  
10  
11  
12  
13  
14  
15  
16  
17  
18  
19  
20  
21  
22  
23  
24  
25  
26  
27  
28  
29  
30  
31  
32  
33  
34  
35  
36  
37  
38  
39  
40  
41  
42  
43  
44  
45  
46  
47

|               |                                      |                               |                                                                                                                                                                                                                                                                                                                                                                                   |                                                                |                                                                                                                                                                                                                                                                                                                                                                                                                                                                                                                                               |
|---------------|--------------------------------------|-------------------------------|-----------------------------------------------------------------------------------------------------------------------------------------------------------------------------------------------------------------------------------------------------------------------------------------------------------------------------------------------------------------------------------|----------------------------------------------------------------|-----------------------------------------------------------------------------------------------------------------------------------------------------------------------------------------------------------------------------------------------------------------------------------------------------------------------------------------------------------------------------------------------------------------------------------------------------------------------------------------------------------------------------------------------|
|               |                                      |                               | phosphate binder decision support tool.                                                                                                                                                                                                                                                                                                                                           |                                                                |                                                                                                                                                                                                                                                                                                                                                                                                                                                                                                                                               |
| Jansen (71)   | CKD Stages 4 – 5                     | 7                             | Feasibility of “a psychosocial intervention to assist ESRD patients and their partners in integrating renal disease and treatment into daily activities, primary work and thereby increasing autonomy.” (p.280)<br><br>Intervention: Group teaching and handbook regarding coping strategies and goals based on self-regulation, social learning and self-determination theories. | Interviews: no analytic methodology discussed                  | <ul style="list-style-type: none"> <li>• Benefits: <ul style="list-style-type: none"> <li>○ Group included pre-dialysis and dialysis patients</li> <li>○ Leaders addressed individual needs, situations and questions</li> </ul> </li> <li>• Limitations: <ul style="list-style-type: none"> <li>○ Patient preferences for information differed by stages of CKD</li> <li>○ Patient schedules need to be considered when intervention offered</li> <li>○ Consider offering intervention shortly after diagnosis of CKD</li> </ul> </li> </ul> |
| Thomas (30)   | Type 1 or 2 DM with microalbuminuria | 5 (3 face-to-face interviews) | To evaluate “whether patients understood the content of the pack and whether they could make any recommendations.” (p.275)<br><br>Intervention: See Table 4 Thomas (30)                                                                                                                                                                                                           | Questionnaire and interview: no analytic methodology discussed | <ul style="list-style-type: none"> <li>• Mixed responses</li> <li>• DVD – content distressing and took effort to use</li> <li>• Written material useful, but need to elaborate on seriousness of disease</li> <li>• Package helped change behavior – stop smoking, monitoring DM</li> </ul>                                                                                                                                                                                                                                                   |
| Williams (19) | CKD Stages 2 – 4 with diabetes and   | 26                            | “Examine the perceptions of a                                                                                                                                                                                                                                                                                                                                                     | Interviews: Ritchie and                                        | <ul style="list-style-type: none"> <li>• Attitudes towards taking medications (i.e.</li> </ul>                                                                                                                                                                                                                                                                                                                                                                                                                                                |

|               |                                                             |    |                                                                                                                                                                                                                                                 |                                                   |                                                                                                                                                                                                                                                                                                                                                                                                                                                                                                                                                                               |
|---------------|-------------------------------------------------------------|----|-------------------------------------------------------------------------------------------------------------------------------------------------------------------------------------------------------------------------------------------------|---------------------------------------------------|-------------------------------------------------------------------------------------------------------------------------------------------------------------------------------------------------------------------------------------------------------------------------------------------------------------------------------------------------------------------------------------------------------------------------------------------------------------------------------------------------------------------------------------------------------------------------------|
|               | cardiovascular disease                                      |    | group of CALD participants with comorbid diabetes, chronic kidney disease and cardiovascular disease ... using an intervention to influence their medication self-efficacy.” (p. 1271)<br><br>Intervention: see Table 4 Williams (44)           | Spencer thematic approach                         | <p>appreciate importance of taking; medication burden; concern with the number of medications, effectiveness and side effects of medications</p> <ul style="list-style-type: none"> <li>• Having to take medications (i.e. behaviors and family support to assist taking medications; forgetting and non-adherent; motivation to take to prevent becoming worse)</li> <li>• Impediments to chronic illness medication self-efficacy (i.e. lack of knowledge regarding medication; strong faith in physician’s advice; multiple medications too overwhelming; cost)</li> </ul> |
| Williams (20) | CKD Stages 2 – 4, with coexisting diabetes and hypertension | 39 | Individual perceptions of a “telephone call using a motivational interviewing approach to improve medication adherence in participants with co-existing diabetes, CKD and hypertension.” (p.472)<br><br>Intervention: see Table 4 Williams (43) | Interviews: Ritchie and Spencer thematic approach | <ul style="list-style-type: none"> <li>• Importance of health (i.e. determined the degree of health behavior; altered medications or use of alternative medicine to control health)</li> <li>• Perceived seriousness of disease (i.e. thinking about mortality; comorbidities complicate care; acute illness with chronic conditions)</li> <li>• Perceived threat of disease (i.e. want to learn about disease control earlier; symptom management; looking for reasons to explain why ill)</li> </ul>                                                                        |

BP – blood pressure; CKD – chronic kidney disease; DM – diabetes mellitus

# BMJ Open

## Self-management interventions for adults with chronic kidney disease: A scoping review

|                                 |                                                                                                                                                                                                                                                                                                                                                                                                                                                                                                                                                                                                                                                                                                                                                                                                                                                                                                                                                                                                                                                                                                                                                  |
|---------------------------------|--------------------------------------------------------------------------------------------------------------------------------------------------------------------------------------------------------------------------------------------------------------------------------------------------------------------------------------------------------------------------------------------------------------------------------------------------------------------------------------------------------------------------------------------------------------------------------------------------------------------------------------------------------------------------------------------------------------------------------------------------------------------------------------------------------------------------------------------------------------------------------------------------------------------------------------------------------------------------------------------------------------------------------------------------------------------------------------------------------------------------------------------------|
| Journal:                        | <i>BMJ Open</i>                                                                                                                                                                                                                                                                                                                                                                                                                                                                                                                                                                                                                                                                                                                                                                                                                                                                                                                                                                                                                                                                                                                                  |
| Manuscript ID                   | bmjopen-2017-019814.R1                                                                                                                                                                                                                                                                                                                                                                                                                                                                                                                                                                                                                                                                                                                                                                                                                                                                                                                                                                                                                                                                                                                           |
| Article Type:                   | Research                                                                                                                                                                                                                                                                                                                                                                                                                                                                                                                                                                                                                                                                                                                                                                                                                                                                                                                                                                                                                                                                                                                                         |
| Date Submitted by the Author:   | 21-Dec-2017                                                                                                                                                                                                                                                                                                                                                                                                                                                                                                                                                                                                                                                                                                                                                                                                                                                                                                                                                                                                                                                                                                                                      |
| Complete List of Authors:       | Donald, Maoliosa; University of Calgary Cumming School of Medicine, Kaur Kahlon, Bhavneet; University of Calgary Cumming School of Medicine, Medicine<br>Beanlands, Heather ; Ryerson University, Daphne Cockwell School of Nursing<br>Straus, Sharon; St. Michael's Hospital, Li Ka Shing Knowledge Institute<br>Ronksley, Paul; University of Calgary, Community Health Sciences<br>Herrington, Gwen ; Can-SOLVE CKD Network<br>Tong, Allison; The University of Sydney, Sydney School of Public Health<br>Grill, Allan ; University of Toronto, Family & Community Medicine<br>Waldvogel, Blair; Can-SOVLVE CKD Network<br>Large, Chantel; Can-SOLVE CKD Network<br>Large, Claire; Can-SOLVE CKD Network<br>Harwood, L; Lawson Health Research Institute<br>Novak, Marta; University of Toronto, Psychiatry<br>James, Matthew; University of Calgary, Department of Medicine<br>Elliott, Meghan; University of Calgary, Medicine<br>Fernandez, Nicolas ; Can-SOLVE CKD Network<br>Brimble, K. S.; McMaster University Department of Medicine<br>Samual, Susan; University of Calgary, Pediatrics<br>Hemmelgarn, Brenda; University of Calgary |
| <b>Primary Subject Heading</b>: | Renal medicine                                                                                                                                                                                                                                                                                                                                                                                                                                                                                                                                                                                                                                                                                                                                                                                                                                                                                                                                                                                                                                                                                                                                   |
| Secondary Subject Heading:      | Health services research, Patient-centred medicine                                                                                                                                                                                                                                                                                                                                                                                                                                                                                                                                                                                                                                                                                                                                                                                                                                                                                                                                                                                                                                                                                               |
| Keywords:                       | Chronic kidney disease, scoping review, patient-centred care                                                                                                                                                                                                                                                                                                                                                                                                                                                                                                                                                                                                                                                                                                                                                                                                                                                                                                                                                                                                                                                                                     |
|                                 |                                                                                                                                                                                                                                                                                                                                                                                                                                                                                                                                                                                                                                                                                                                                                                                                                                                                                                                                                                                                                                                                                                                                                  |

SCHOLARONE™  
Manuscripts

## Self-management interventions for adults with chronic kidney disease: A scoping review

**Authorship:** Maoliosa Donald MSc<sup>1,2,3</sup>, Bhavneet Kaur Kahlon MD<sup>3</sup>, Heather Beanlands PhD<sup>4</sup>, Sharon Straus MSc, MD<sup>5,6</sup>, Paul Ronksley PhD<sup>2,3</sup>, Gwen Herrington<sup>7</sup>, Allison Tong PhD<sup>8</sup>, Allan Grill MD<sup>9</sup>, Blair Waldvogel<sup>7</sup>, Chantel A. Large<sup>7</sup>, Claire L. Large<sup>7</sup>, Lori Harwood PhD<sup>10</sup>, Marta Novak PhD, MD<sup>11</sup>, Matthew T. James PhD, MD<sup>1,2,3</sup>, Meghan Elliott MD<sup>6</sup>, Nicolas Fernandez PhD<sup>7</sup>, Scott Brimble MSc, MD<sup>12</sup>, Susan Samuel MSc, MD<sup>13</sup>, Brenda R. Hemmelgarn PhD, MD<sup>1,2,3</sup>

### Affiliations:

<sup>1</sup> Department of Medicine, University of Calgary, Calgary, Alberta, Canada

<sup>2</sup> Interdisciplinary Chronic Disease Collaboration, Calgary, Alberta, Canada

<sup>3</sup> Department of Community Health Sciences, University of Calgary, Calgary, Alberta, Canada

<sup>4</sup> Daphne Cockwell School of Nursing, Ryerson University, Toronto, Ontario, Canada

<sup>5</sup> Institute of Health Policy, Management and Evaluation, University of Toronto, Toronto, Ontario, Canada

<sup>6</sup> Li Ka Shing Knowledge Institute, St. Michael's Hospital, Toronto, Ontario, Canada

<sup>7</sup> Can-SOLVE CKD Network, Patient Partner

<sup>8</sup> Sydney School of Public Health, The University of Sydney, Sydney, New South Wales, Australia

<sup>9</sup> Department of Family & Community Medicine, University of Toronto, Ontario, Canada

<sup>10</sup> Lawson Health Research Institute, London, Ontario, Canada

<sup>11</sup> Centre for Mental Health, University Health Network and Department of Psychiatry, University of Toronto, Toronto, Ontario, Canada

<sup>12</sup> Department of Medicine, McMaster University, Hamilton, Ontario, Canada

<sup>13</sup> Department of Pediatrics, University of Calgary, Calgary, Alberta, Canada

### Corresponding author's address:

Dr. Brenda R Hemmelgarn, MD, PhD, FRCPC

Cumming School of Medicine, University of Calgary

TRW Building, 3rd Floor

3280 Hospital Drive NW

Calgary, AB Canada T2N 4Z6

Phone: 403-210-7065

Fax: (403) 210-9286

Email: [Brenda.Hemmelgarn@albertahealthservices.ca](mailto:Brenda.Hemmelgarn@albertahealthservices.ca)

## CKD self-management interventions

**ABSTRACT**

**Objective:** To systematically identify and describe self-management interventions for adult patients with CKD.

**Setting:** Community-based

**Participants:** Adults with CKD Stages 1 – 5 (not requiring kidney replacement therapy).

**Interventions:** Self-management strategies for adults with CKD.

**Primary and secondary outcome measures:** Using a scoping review, electronic databases and grey literature were searched in October 2016 to identify self-management interventions for adults with CKD Stages 1 – 5 (not requiring kidney replacement therapy). Randomized controlled trials (RCTs), non-RCTs, qualitative and mixed method studies were included and study selection and data extraction were independently performed by two reviewers. Outcomes included behaviors, cognitions, physiological measures, symptoms, health status and health care.

**Results:** Fifty studies (19 RCTs, 7 quasi-experimental, 5 observational, 13 pre-post intervention, 1 mixed methods and 5 qualitative) reporting 45 interventions were included. The most common intervention topic was diet/nutrition and interventions were regularly delivered face to face. Interventions were administered by a variety of providers, with nursing professionals the most common health professional group. Cognitions (i.e. changes in general CKD knowledge, perceived self-management, and motivation) was the most frequently reported outcome domain that showed improvement. Less than 1% of the interventions were co-developed with patients and 20% were based on a theory or framework.

1  
2  
3 **Conclusions:** There was a wide range of self-management interventions with considerable  
4  
5  
6  
7  
8  
9  
10  
11  
12  
13  
14  
15  
16  
17  
18  
19  
20  
21  
22  
23  
24  
25  
26  
27  
28  
29  
30  
31  
32  
33  
34  
35  
36  
37  
38  
39  
40  
41  
42  
43  
44  
45  
46  
47  
48  
49  
50  
51  
52  
53  
54  
55  
56  
57  
58  
59  
60  
variability in outcomes for adults with CKD. Major gaps in the literature include lack of patient engagement in the design of the interventions, with the majority of interventions not applying a behavioral change theory to inform their development. This work highlights the need to involve patients to co-develop and evaluate a self-management intervention based on sound theories and clinical evidence.

**Key words:** Chronic kidney disease, scoping review, self-management, person centered-care

**Strengths and limitations of this study:**

- A strength of our study is that it is the first scoping review to apply the principles of patient-oriented research, where patient partners were engaged in determining the research question, advising us on search terms and reviewing the results to ensure we captured and reported the data meaningfully.
- Our scoping review is comprehensive in nature, inclusion of all study designs and consideration of self-management features that have not been investigated previously.
- Due to the heterogeneous nature of the literature, it was challenging to synthesize the data. To address this challenge the two reviewers used two standardized tools to independently extract data, and independently coded the outcomes into categories using the Self-and Family Management Framework.
- A limitation of our scoping review is that we were unable to assess the self-management outcomes in terms of sustained changes in behavior, physiological, and health status.

## CKD self-management interventions

- We were unable to draw conclusions regarding the most effective self-management intervention for adult patients with CKD, keeping in mind our aim was to review the breadth of the current literature and present the gaps that exist.

For peer review only

## INTRODUCTION

Chronic kidney disease (CKD) is associated with adverse health outcomes, poor quality of life and high health care costs (1). Patients with CKD often experience a number of comorbidities including diabetes, cardiovascular disease and depression (2). They must balance the medical management of their kidney disease and other chronic conditions with demands of their daily lives, including managing the emotional and psychosocial consequences of living with chronic disease. In a recent CKD research priority setting study, individuals with non-dialysis CKD, their caregivers, clinicians and policy makers identified the need to develop optimal strategies to enable patients to manage their CKD and related comorbidities to slow or prevent the progression to end-stage kidney disease (ESKD) (3). International data in research priority setting for kidney disease also highlights self-management as a top priority to prevent progression (4).

Self-management interventions aim to facilitate an individual's ability to make lifestyle changes and manage symptoms, treatment, and the physical and psychosocial consequences inherent in living with CKD and associated comorbidities (5). Self-management of CKD involves focusing on illness needs (developing knowledge, skills and confidence to manage medical aspects), activating resources (identifying and accessing resources and supports) and living with the condition (learning to cope with the condition and its impact on their lives as well as the emotional consequences of the illness) (6). Self-management requires patient engagement, however, the degree to which patients are able or willing to participate in self-management can vary, and individual and health system factors may serve as facilitators or barriers to self-management processes (7).



## CKD self-management interventions

1  
2  
3 Despite the high prevalence of CKD and its impact on patient outcomes, there is limited  
4  
5 evidence on the effectiveness of self-management interventions. Prior systematic reviews (8 -  
6  
7 11) and three integrative reviews (12-14) found that self-management interventions were  
8  
9 variable in their effectiveness for managing and preventing progression of CKD. While these  
10  
11 reviews add to the knowledge base, they have restricted inclusion criteria (e.g. study type, patient  
12  
13 population) and unclear reporting strategies (i.e. describing complex self-management  
14  
15 interventions in detail and providing structured accounts of the interventions and outcomes). In  
16  
17 particular, features of self-management interventions such as person centeredness, applicability  
18  
19 to co-morbidities associated with CKD, physiological and non-physiological outcomes, and  
20  
21 application of any behavioral change theories are often lacking. Self-management interventions  
22  
23 need to be tailored to suit diverse patient needs and preferences, as well as the local health care  
24  
25 context (7). Therefore, investigating the “who”, “what” and the “how” of self-management  
26  
27 interventions is crucial. We used recognized literature synthesis and reporting guidelines, along  
28  
29 with engagement of our patient partners in determining the research question and search terms,  
30  
31 as well as reviewing the results to ensure we captured and reported the data meaningfully.  
32  
33

34  
35  
36  
37  
38 To our knowledge there is no literature synthesis that systematically and comprehensively  
39  
40 summarizes the breadth of evidence found in primary quantitative, qualitative and mixed  
41  
42 methods research regarding self-management interventions for adult patients with CKD. We  
43  
44 used a scoping review methodology to understand the range and types of interventions including  
45  
46 both educational and support interventions for CKD to inform the future design of a self-  
47  
48 management intervention. Specifically, we conducted a scoping review to identify and describe  
49  
50 self-management interventions for adult patients with CKD (stages 1 – 5; non-dialysis, non-  
51  
52 transplant).  
53  
54  
55  
56  
57  
58  
59  
60

## MATERIALS AND METHODS

We used a scoping review methodology to enable us to incorporate a broad range of studies and to summarize the knowledge from a variety of sources and types of evidence (15). Our aim was to identify gaps in literature related to CKD self-management interventions and inform future research. A unique and important aspect was the involvement of “patient partners”. Through a national initiative, Canadians Seeking Solutions and Innovations to Overcome CKD (Can-SOLVE CKD), patients work side by side with researchers, clinicians and decision makers to address patient-oriented research priorities (16). Our research team includes Can-SOLVE CKD patient partners with CKD and caregivers (16). Using the Joanna Briggs Institute framework for scoping reviews we undertook the following steps: (1) identified the research question, (2) identified relevant studies, (3) completed study selection, (4) charted, collated, summarized and reported the results, and (5) consulted with our patient partners (15, 17). These steps were iterative to ensure comprehensive inclusion of the literature and continued meaningful engagement with our patient partners. This work involves identifying, reviewing and categorizing data from primary articles and does not involve human participants and is exempt from ethics approval.

### Research aim

Our scoping review aimed to determine the available self-management interventions for adults aged 18 years and over and diagnosed with CKD Stages 1 – 5 (not requiring dialysis or transplant).

## Search and selection of studies

We worked with an information specialist (DL) to identify key words that represented the population (CKD) and the intervention (self-management). We searched a broad range of information sources including the following online databases: MEDLINE (OVID), EMBASE, PsycINFO, Cochrane Central Register of Controlled Trials, CINAHL Plus and Cochrane Database of Systematic Reviews for published studies, with no limits on date (inception to October 2016), language, age or study design. We also searched Web of Science from 2006 – October 2016 to capture recently published meeting abstracts and summaries. Using the Canadian Agency for Drugs and Technology (CADTH) Grey Matters approach, (18) we searched Google Canada, Health Technology Assessment (HTA) agencies (Canada, Australia, Ireland, UK and US), and Clinical Trials databases (Biomed Central – ISRCTN Registry, US National Institutes of Health, ClinicalTrials.gov) during October 2016 with no language restrictions (Table S1). Our search strategy for grey literature was guided by the specific database (i.e. Google search operators, website search filters) and was completed within a single session for each search strategy to ensure consistency due to the dynamic nature of the Internet (Table S2). Two reviewers (BK and MD) also reviewed the reference lists of included studies, along with those identified in past systematic and integrative reviews of our research topic. We contacted authors of relevant protocols and conference abstracts to ascertain if their work and findings were published.

A study was included if the population involved adults with CKD (stages 1 – 5, non-dialysis, non-transplant). Self-management interventions included strategies, tools, or resources in any delivery format (print, electronic, face to face, etc.) that facilitated an individual's ability to make

1  
2  
3 lifestyle changes or to manage symptoms, treatment, or the physical and psychosocial  
4 consequences inherent in living with CKD and other associated comorbidities. Interventions  
5 targeted only at selection of treatment for ESKD (i.e. dialysis, kidney transplant) were excluded.  
6  
7 Other self-management interventions or standard care were considered as a comparison. We  
8 included primary studies that used quantitative, qualitative or mixed methods. Systematic and  
9 integrative reviews were identified for the purpose of reviewing their included studies for  
10 potential relevant studies. We excluded case series, case studies, case reports, clinical practice  
11 guidelines, theses and opinion-driven reports (editorials, non-systematic or literature/narrative  
12 reviews).

13  
14 Three reviewers (BK, MD, and BH) performed an initial screen of titles and abstracts using a  
15 citation screening tool. To determine inter-rater reliability, a calibration exercise was performed  
16 by the three reviewers. Pilot testing a random sample of 50 citations achieved good agreement  
17 (kappa = 0.79) at which point the three reviewers screened the remaining titles and abstracts.  
18  
19 Two reviewers (BK and MD) followed a similar procedure for identifying relevant full text  
20 studies, with good agreement between the two reviewers (kappa = 0.78). Disagreements were  
21 resolved by discussion and obtaining consensus between the three reviewers.  
22  
23

### 24 **Charting, collating and summarizing the data**

25  
26 We developed a data extraction form based on the Template for Intervention Description and  
27 Replication (TIDierR) checklist (19). This checklist provides a template to structure accounts of  
28 an intervention (e.g. goal of intervention, materials used, who delivered the intervention and  
29 how, where, when and how much, and how well the intervention was delivered). We also used  
30 the Effective Practice and Organization of Care (EPOC) data collection form (20) to ensure we  
31 were comprehensive in extracting relevant study characteristics as outlined by Cochrane EPOC  
32  
33  
34  
35  
36  
37  
38  
39  
40  
41  
42  
43  
44  
45  
46  
47  
48  
49  
50  
51  
52  
53  
54  
55  
56  
57  
58  
59  
60

## CKD self-management interventions

1  
2  
3 group. Study characteristics (e.g. study design, country of origin, publication year), population  
4 characteristics (e.g. CKD stage, comorbidities), and self-management intervention characteristics  
5 (e.g. topics, format, target audience, providers, location, dose, duration, etc.) were documented.  
6  
7  
8 For the study outcomes, the two reviewers (BK and MD) independently coded each outcome into  
9  
10 categories identified by Grey et al (e.g. behaviors, cognitions, physiological measures,  
11  
12 symptoms, health status, health care and other) (6). We pilot tested the form on a random sample  
13  
14 of 10 eligible studies and once consensus between the two reviewers was reached, we  
15  
16 independently abstracted data from the remaining eligible studies. Data was categorized and  
17  
18 reported descriptively (i.e. counts and frequencies). For qualitative studies we identified the  
19  
20 methodology and key concepts presented by the authors.  
21  
22  
23  
24  
25

**Consultation with patient partners**

26  
27  
28 Patient partners were engaged throughout this work, specifically to provide input on the research  
29  
30 question, search strategies (e.g. grey literature sources) and reviewing the final results. The  
31  
32 results were presented and discussed at the national Can-SOLVE CKD meeting.  
33  
34  
35  
36

**RESULTS****Search results**

37  
38  
39 From 12,583 unique citations (Figure 1) we included 50 full text studies (21-70).  
40  
41  
42

**Description of studies**

43  
44  
45  
46  
47  
48  
49 A summary of the 50 studies included in this review is provided in Table 1.  
50  
51  
52  
53  
54  
55  
56  
57  
58  
59  
60

1  
2  
3  
4  
5  
6  
7  
8  
9  
10  
11  
12  
13  
14  
15  
16  
17  
18  
19  
20  
21  
22  
23  
24  
25  
26  
27  
28  
29  
30  
31  
32  
33  
34  
35  
36  
37  
38  
39  
40  
41  
42  
43  
44  
45  
46  
47  
48  
49  
50  
51  
52  
53  
54  
55  
56  
57  
58  
59  
60

For peer review only

## CKD self-management interventions

**Table 1** Characteristics of the studies included in scoping review

| Characteristic                             | Studies (N = 50) |
|--------------------------------------------|------------------|
| <b>Study design</b>                        |                  |
| Randomized controlled trial                | 19               |
| Pre-post test                              | 13               |
| Quasi-experimental (controlled/non-random) | 7                |
| Observational                              | 5                |
| Qualitative                                | 5                |
| Mixed methods                              | 1                |
| <b>Origin of study</b>                     |                  |
| United States                              | 10               |
| United Kingdom                             | 7                |
| Australia                                  | 6                |
| Canada                                     | 5                |
| Taiwan                                     | 5                |
| Netherlands                                | 3                |
| Spain                                      | 3                |
| Italy                                      | 2                |
| Japan                                      | 2                |
| New Zealand                                | 2                |
| Sweden                                     | 2                |
| Brazil                                     | 1                |
| Denmark                                    | 1                |
| Korea                                      | 1                |
| <b>Year of publication</b>                 |                  |
| 2012 – 2016                                | 32               |
| 2007 – 2011                                | 11               |
| Prior                                      | 7                |

The most common study designs were randomized controlled trials (RCTs) (38%). Non-RCTs consisted of quasi-experimental (14%), observational (10%), pre-post intervention (26%), qualitative (10%) and mixed methods (2%). The studies were conducted in 14 countries, including the United States (20%), United Kingdom (14%) and Australia (12%). Most studies were published in the last 5 years (64%).

### **Patient population characteristics**

The target population in most studies was CKD (72%) and 15 studies mentioned CKD plus one or more associated comorbidities. The average ages of participants reported across studies were 50.2 to 74.3 years.

### **Description of self-management interventions**

Table 2 summarizes the characteristics of the self-management interventions. Five studies reported the same self-management intervention (21-25), therefore 45 interventions were summarized. The most common intervention topic was diet/nutrition (64%) and the least common were symptom management and lifestyle (13% and 11% respectively). The most frequent modes of delivering the intervention were face to face (80%), multiple (i.e. more than one mode) (71%) and print (64%). Electronic was the least common delivery mode (16%). Interventions were administered by a variety of providers. The most common category of providers was “other” (56%), which was made up of various types of health professionals and lay people. However, the most common identifiable group of providers were nursing professionals (49%). Patient volunteer/mentor was the least common (9%). The outpatient setting was the most common location for providing the self-management intervention (51%), and the inpatient setting was the least popular (2%). Many studies did not report the intervention language (53%), but 12 languages were represented and 7 studies reported that they provided the intervention in multiple languages.

In terms of intervention development, only 20% of studies mentioned the use of evidence such as theories or frameworks. These included the transtheoretical model of behavior change, social cognitive theory and chronic care model (26-30). Less than 1% of the studies involved patients in



## CKD self-management interventions

the design of the intervention, where patients were interviewed regarding intervention content (26, 31-33).

**Table 2** Overall characteristics of self-management interventions

| Variable                                        | Intervention count (N = 45) |
|-------------------------------------------------|-----------------------------|
| <b>Intervention topics</b>                      |                             |
| Diet/nutrition                                  | 29                          |
| General CKD knowledge                           | 18                          |
| Other (i.e. advanced care planning, meditation) | 18                          |
| Medication                                      | 17                          |
| Modalities                                      | 13                          |
| Physical activity                               | 13                          |
| Comorbidities                                   | 11                          |
| Symptom management                              | 6                           |
| Lifestyle                                       | 5                           |
| <b>Mode of Delivery</b>                         |                             |
| Face to face (i.e. group, one-on-one)           | 36                          |
| Multiple modes                                  | 32                          |
| Print                                           | 29                          |
| Distance (i.e. telephone, email)                | 13                          |
| Digital (i.e. DVD, PowerPoint, audio recording) | 8                           |
| Electronic (i.e. website, mobile application)   | 7                           |
| <b>Type of providers</b>                        |                             |
| Other*                                          | 25                          |
| Nurse/nurse practitioner                        | 22                          |
| Dietitian                                       | 14                          |
| Multiple providers                              | 13                          |
| Social worker                                   | 6                           |
| Physician/primary care physician                | 6                           |
| Nephrologist/nephrology fellows                 | 5                           |
| Patient volunteer/mentor                        | 4                           |
| Pharmacist                                      | 1                           |
| <b>Location of intervention</b>                 |                             |
| Outpatient                                      | 23                          |
| Not specified                                   | 12                          |
| Community (non-clinic)**                        | 10                          |
| Patient home                                    | 10                          |
| Multiple locations                              | 7                           |
| Inpatient                                       | 1                           |
| <b>Intervention languages</b>                   |                             |
| Not Specified                                   | 24                          |

## CKD self-management interventions

|                                 |    |
|---------------------------------|----|
| English                         | 10 |
| Multiple languages              | 7  |
| Mandarin                        | 4  |
| Spanish                         | 3  |
| Taiwanese                       | 3  |
| Dutch                           | 2  |
| Cantonese                       | 1  |
| French                          | 1  |
| Greek                           | 1  |
| Italian                         | 1  |
| Japanese                        | 1  |
| Swedish                         | 1  |
| Vietnamese                      | 1  |
| <b>Intervention development</b> |    |
| Use of framework or theory      | 9  |
| Co-designed with patients       | 4  |

## CKD self-management interventions

**Description of quantitative study outcomes and results**

Characteristics of the quantitative study outcomes are presented in Table 3. Twenty-three (46%) studies measured physiological outcomes (i.e. laboratory tests, body composition, etc.). The least common outcomes reported by studies were health status and health care (each 10%) and symptoms (i.e. fatigue) (4%). Table 4 summarizes the details of the quantitative studies. We categorized the overall study results descriptively as improved, unchanged, or worse. Many studies had more than one outcome measure (e.g.. one measure improved, another had no change) and they were reported as mixed results. Based on this method of categorization, 89 outcomes were reported, of which 61% improved, 20% had no change, 1% worsened, and 13% had mixed results. Four of the results were reported as not applicable as the outcomes were not relevant. Of the 54 outcome categories that improved, 15 were cognition, 9 were physiological measures, 8 were behaviors, 8 were individual outcomes, 5 were health status, 4 were health care, 4 were intervention specific, and 1 was symptom management.

**Table 3** Summary of quantitative study outcomes\*

| <b>Common outcomes</b> | <b>Description</b>                                                                                                   | <b>Number of studies</b> | <b>Number of studies in which outcome improved</b> |
|------------------------|----------------------------------------------------------------------------------------------------------------------|--------------------------|----------------------------------------------------|
| Physiologic measures   | Changes in laboratory tests, blood pressure, body composition, functional/performance tests and cardiovascular risk. | 23                       | 9                                                  |
| Cognitions             | Changes in general CKD knowledge, self-efficacy, self-management, motivation, perceived stress, anxiety and fear.    | 21                       | 15                                                 |
| Behaviors              | Adherence to diet, medication, physical activity, sleep, blood pressure control.                                     | 13                       | 8                                                  |
| Individual outcomes    | QOL, well-being and general satisfaction.                                                                            | 11                       | 8                                                  |
| Intervention specific  | Reporting of general concepts regarding feasibility of intervention, enjoyment and interest in intervention.         | 9                        | 4                                                  |
| Health care            | Measurements of cost effectiveness, health care utilization and access.                                              | 5                        | 4                                                  |
| Health status          | Measurements of morbidity and mortality (i.e. time to dialysis, survival, all-cause mortality).                      | 5                        | 5                                                  |
| Symptoms               | Changes in overall symptoms (i.e. pain, fatigue)                                                                     | 2                        | 1                                                  |

\* Based on primary and distal outcomes from Grey et al (6)

CKD – chronic kidney disease; QOL – quality of life

## CKD self-management interventions

Table 4 Summary of quantitative studies

| Study & Year (Reference) | Design | Target Population                                                                   | Study Size Age (years)                                     | Intervention Topic(s)                                                                                                                                       | Provider(s)                | Delivery Format                                                                                          | Description of Intervention                                                                                                                                                                                                                                                                                                                                                                               | Study Outcomes                                                                                                                                                                                      | Study Results |
|--------------------------|--------|-------------------------------------------------------------------------------------|------------------------------------------------------------|-------------------------------------------------------------------------------------------------------------------------------------------------------------|----------------------------|----------------------------------------------------------------------------------------------------------|-----------------------------------------------------------------------------------------------------------------------------------------------------------------------------------------------------------------------------------------------------------------------------------------------------------------------------------------------------------------------------------------------------------|-----------------------------------------------------------------------------------------------------------------------------------------------------------------------------------------------------|---------------|
| <b>RCT</b>               |        |                                                                                     |                                                            |                                                                                                                                                             |                            |                                                                                                          |                                                                                                                                                                                                                                                                                                                                                                                                           |                                                                                                                                                                                                     |               |
| Binik 1993 (34)          | RCT    | Pre-RRT CKD (creatinine $\geq 350$ $\mu\text{mol/L}$ and rising rapidly)            | 204 (E = 87, C = 92, not part of education = 25) Age: 50.2 | <ul style="list-style-type: none"> <li>General CKD knowledge</li> <li>Diet/nutrition</li> <li>Modalities</li> </ul>                                         | Trained research assistant | <ul style="list-style-type: none"> <li>Print</li> <li>Face to face</li> <li>PowerPoint slides</li> </ul> | <p>“Enhanced education”:</p> <ul style="list-style-type: none"> <li>22-page booklet</li> <li>Individual slide presentation (75 mins)</li> </ul> <p>Duration – one session<br/>Comparator: standard care</p>                                                                                                                                                                                               | <p>Health Status:</p> <ul style="list-style-type: none"> <li>Duration between session &amp; dialysis initiation – <i>patient in E group survived 4.6 months longer w/o requiring RRT</i></li> </ul> | ●             |
| Gillis 1995 (35)         | RCT    | CKD 3-5                                                                             | 840 (unclear) Age: NR                                      | <ul style="list-style-type: none"> <li>Diet/nutrition</li> </ul>                                                                                            | Dietician                  | <ul style="list-style-type: none"> <li>Print</li> <li>Face to face</li> </ul>                            | <p>“Modification of diet in renal disease”:</p> <ul style="list-style-type: none"> <li>“Keeping Track” booklet</li> <li>Monthly meeting with dietician</li> <li>Protein Wise Counter (lists protein content of foods)</li> <li>“Shopping Wise”: a guide to convenience and fast foods</li> <li>Visited restaurants and shops</li> </ul> <p>Duration – 26 months<br/>Comparator: standard protein diet</p> | <p>Cognitions:</p> <ul style="list-style-type: none"> <li>Patient reliance on dietician’s feedback, support and modeling strategies - <i>decreased over time in E group</i></li> </ul>              | ●             |
|                          |        |                                                                                     |                                                            |                                                                                                                                                             |                            |                                                                                                          |                                                                                                                                                                                                                                                                                                                                                                                                           | <p>Individual Outcomes:</p> <ul style="list-style-type: none"> <li>Top rated interventions by patients - <i>counseling, self-monitoring, protein counter</i></li> </ul>                             | ●             |
| Devins 2003 (36)         | RCT    | CKD (creatinine $\leq 300$ $\mu\text{mol/L}$ and deemed to need RRT in 6-18 months) | 297 (E = 149, C = 148) Age: 58.6                           | <ul style="list-style-type: none"> <li>General CKD knowledge</li> <li>Diet/nutrition</li> <li>Medication</li> <li>Modalities</li> <li>Lifestyles</li> </ul> | Social worker              | <ul style="list-style-type: none"> <li>Print</li> <li>Face to face</li> <li>Telephone</li> </ul>         | <p>“Psychoeducation”:</p> <ul style="list-style-type: none"> <li>60-page booklet</li> <li>90 min interactive educational intervention personalized for each patient</li> <li>Supportive (10 min max) phone calls Q3 weeks</li> </ul> <p>Duration – 18 months or initiation of RRT</p>                                                                                                                     | <p>Health Status:</p> <ul style="list-style-type: none"> <li>Time to dialysis – <i>E group had 3 month delay in dialysis compared to C group</i></li> </ul>                                         | ●             |

## CKD self-management interventions

|    |                          |     |                                                               |                                                    |                                                                                                                                                                                             |                                                                 |                                                                                                                |                                                                                                                                                                                                                                                                                                                              |                         |                                                                                                                                                                                                                                                                                                               |  |
|----|--------------------------|-----|---------------------------------------------------------------|----------------------------------------------------|---------------------------------------------------------------------------------------------------------------------------------------------------------------------------------------------|-----------------------------------------------------------------|----------------------------------------------------------------------------------------------------------------|------------------------------------------------------------------------------------------------------------------------------------------------------------------------------------------------------------------------------------------------------------------------------------------------------------------------------|-------------------------|---------------------------------------------------------------------------------------------------------------------------------------------------------------------------------------------------------------------------------------------------------------------------------------------------------------|--|
| 1  |                          |     |                                                               |                                                    |                                                                                                                                                                                             |                                                                 |                                                                                                                |                                                                                                                                                                                                                                                                                                                              |                         |                                                                                                                                                                                                                                                                                                               |  |
| 2  |                          |     |                                                               |                                                    |                                                                                                                                                                                             |                                                                 |                                                                                                                |                                                                                                                                                                                                                                                                                                                              |                         |                                                                                                                                                                                                                                                                                                               |  |
| 3  |                          |     |                                                               |                                                    |                                                                                                                                                                                             |                                                                 |                                                                                                                |                                                                                                                                                                                                                                                                                                                              |                         |                                                                                                                                                                                                                                                                                                               |  |
| 4  | Devins<br>2005<br>(37)   | RCT | CKD with<br>progressive<br>reduction in<br>kidney<br>function | 335<br>(E = 172,<br>C = 163)<br>Age: 47.4-<br>53.9 | <ul style="list-style-type: none"> <li>• General CKD Knowledge</li> <li>• Diet/nutrition</li> <li>• Modalities</li> </ul>                                                                   | Health educator                                                 | <ul style="list-style-type: none"> <li>• Print</li> <li>• Face to face</li> <li>• PowerPoint slides</li> </ul> | <p>“Psychoeducation session”:</p> <ul style="list-style-type: none"> <li>• 22-page booklet</li> <li>• Individual slide presentation (60-75 min long)</li> </ul> <p>Duration – one visit</p> <p>Comparator: standard care</p>                                                                                                 | Health Status:          | <ul style="list-style-type: none"> <li>• Survival pre-dialysis and after dialysis initiation – <i>significantly longer in the E group (2.25 years and 8 months respectively)</i></li> </ul>                                                                                                                   |  |
| 9  | Campbell<br>2008<br>(38) | RCT | CKD 4-5                                                       | 47<br>(E = 24,<br>C = 23)<br>Age: 68.5-<br>72.6    | <ul style="list-style-type: none"> <li>• Diet/nutrition</li> <li>• Other (i.e. self-management principles)</li> </ul>                                                                       | Dietician                                                       | <ul style="list-style-type: none"> <li>• Face to face</li> <li>• Telephone</li> </ul>                          | <p>“Individual nutritional counseling”:</p> <ul style="list-style-type: none"> <li>• Initial individual consultation with dietician</li> <li>• Then phone follow-up Q2 weeks x 1 month then Q1 month</li> </ul> <p>Duration: 12 weeks</p> <p>Comparator: standard care</p>                                                   | Individual outcomes:    | <ul style="list-style-type: none"> <li>• QOL – <i>many components of KDQOLSF v1.3 improved: □CKD symptoms, □cognitive function, vitality*</i></li> </ul>                                                                                                                                                      |  |
| 15 |                          |     |                                                               |                                                    |                                                                                                                                                                                             |                                                                 |                                                                                                                |                                                                                                                                                                                                                                                                                                                              | Physiological measures: | <ul style="list-style-type: none"> <li>• Nutritional assessment PG-SGA – <i>in E group those who were malnourished at baseline improved, in C group malnourished from 12.5-25%</i></li> </ul>                                                                                                                 |  |
| 20 | Byrne 2011<br>(26)       | RCT | CKD 1-4 +<br>HTN                                              | 81<br>(E = 40,<br>C = 41)<br>Age: 62.8-<br>65.4    | <ul style="list-style-type: none"> <li>• Comorbidities (i.e. HTN management)</li> </ul>                                                                                                     | Nurse                                                           | <ul style="list-style-type: none"> <li>• Print</li> <li>• Face to face</li> <li>• Telephone</li> </ul>         | <p>“Structured education session”:</p> <ul style="list-style-type: none"> <li>• Leaflet on HTN management</li> <li>• CHEERS patient education intervention, and standard care</li> <li>• 2.5 hour group session</li> <li>• Phone support from nurse</li> </ul> <p>Duration: one session</p> <p>Comparator: standard care</p> | Intervention specific:  | <ul style="list-style-type: none"> <li>• Feasibility (recruitment, retention, patient satisfaction, patient access of additional support) - <i>findings suggest delivering/evaluating an effective structured group educational intervention to promote better BP control would be challenging</i></li> </ul> |  |
| 28 | Chen<br>2011<br>(39)     | RCT | CKD 3-5                                                       | 54<br>(E = 27,<br>C = 27)<br>Age: 68.2             | <ul style="list-style-type: none"> <li>• General CKD knowledge</li> <li>• Diet/nutrition</li> <li>• Medication</li> <li>• Lifestyle</li> <li>• Modality information for stage IV</li> </ul> | Nurse, dietician,<br>nephrologist,<br>peers, volunteers         | <ul style="list-style-type: none"> <li>• Print</li> <li>• Face to face</li> <li>• Telephone</li> </ul>         | <p>“Self-management Support”:</p> <ul style="list-style-type: none"> <li>• Individual monthly health education</li> <li>• Weekly telephone based support</li> <li>• Aid of support group twice monthly (5 – 10 patients)</li> </ul> <p>Duration: 12 months</p> <p>Comparator: standard care</p>                              | Physiological measures: | <ul style="list-style-type: none"> <li>• eGFR change – <i>higher in E group</i></li> <li>• eGFR reduction of &gt;50% - <i>less in E group</i></li> <li>• ESRD requiring RRT and all-cause mortality – <i>no significant difference between groups</i></li> </ul>                                              |  |
| 35 |                          |     |                                                               |                                                    |                                                                                                                                                                                             |                                                                 |                                                                                                                |                                                                                                                                                                                                                                                                                                                              | Health Status:          | <ul style="list-style-type: none"> <li>• # Of hospitalizations in 1 year of follow-up – <i>less in E group</i></li> </ul>                                                                                                                                                                                     |  |
| 38 | Flesher<br>2011<br>(40)  | RCT | CKD 3-4 +<br>HTN                                              | 40<br>(E = 23,<br>C = 17)<br>Age: 63.4             | <ul style="list-style-type: none"> <li>• Diet/nutrition</li> <li>• Physical activity</li> </ul>                                                                                             | Nurse, exercise<br>physiologist,<br>dietician, cook<br>educator | <ul style="list-style-type: none"> <li>• Print</li> <li>• Face to face</li> </ul>                              | <p>“Cooking and exercise class”:</p> <ul style="list-style-type: none"> <li>• Standard care and:</li> <li>• Group CKD nutrition class (with dietician and cook educator: 2 hour</li> </ul>                                                                                                                                   | Physiological measures: | <ul style="list-style-type: none"> <li>• Improvement in 4/5 of the following: urinary protein, total cholesterol, eGFR decline, BP, urinary sodium – <i>was considered a</i></li> </ul>                                                                                                                       |  |

CKD self-management interventions

|                    |     |                                              |                                |                                                                                                                               |                    |                                                                                                                                     |                                                                                                                                                                                                                                                                                                                                                                                                                   |                                                                                                                                                                                                                                                                                                                                                                                                            |  |
|--------------------|-----|----------------------------------------------|--------------------------------|-------------------------------------------------------------------------------------------------------------------------------|--------------------|-------------------------------------------------------------------------------------------------------------------------------------|-------------------------------------------------------------------------------------------------------------------------------------------------------------------------------------------------------------------------------------------------------------------------------------------------------------------------------------------------------------------------------------------------------------------|------------------------------------------------------------------------------------------------------------------------------------------------------------------------------------------------------------------------------------------------------------------------------------------------------------------------------------------------------------------------------------------------------------|--|
|                    |     |                                              |                                |                                                                                                                               |                    |                                                                                                                                     | <p>sessions over 4 weeks) plus 1 shopping tour led by a dietician</p> <ul style="list-style-type: none"> <li>• CKD cookbook</li> <li>• 12 week exercise program (3 X 1 hour sessions/week) led by a certified exercise physiologist &amp; nurse</li> </ul> <p><i>Duration: 12 weeks</i><br/><i>Comparator: standard care</i></p>                                                                                  | <p>success – 61% in E group vs. 12% in C group</p> <p>Behaviors:</p> <ul style="list-style-type: none"> <li>• SM score – some changes in some components in both groups</li> </ul>                                                                                                                                                                                                                         |  |
| Joboshi 2012 (41)  | RCT | CKD                                          | 31 (E = 19, C = 12) Age: 69.8  | <ul style="list-style-type: none"> <li>• Other</li> </ul>                                                                     | Nurse              | <ul style="list-style-type: none"> <li>• Face to face</li> <li>• Telephone</li> <li>• Email</li> </ul>                              | <p>“EASE (encourage autonomous self-enrichment) program”:</p> <ul style="list-style-type: none"> <li>• Nurses listen to what patients have difficulties and discuss how they will try to improve</li> <li>• Face to face interview monthly</li> <li>• Telephone or email contact every 2 weeks</li> </ul> <p><i>Duration: 12 weeks</i><br/><i>Comparator: standard care</i></p>                                   | <p>Cognitions:</p> <ul style="list-style-type: none"> <li>• Self-efficacy</li> </ul> <p>Behaviors:</p> <ul style="list-style-type: none"> <li>• Medication adherence</li> <li>• Adherence to BP and weight measurements</li> <li>• Limiting salt intake</li> <li>• Alcohol consumption</li> <li>• Smoking</li> </ul> <p>Physiological measures:</p> <ul style="list-style-type: none"> <li>• BP</li> </ul> |  |
| Williams 2012 (42) | RCT | CKD 2-4 (diabetic kidney disease) + DM + HTN | 75 (E = 39, C = 41) Age: 67    | <ul style="list-style-type: none"> <li>• Medication</li> <li>• Comorbidities</li> </ul>                                       | Nurse              | <ul style="list-style-type: none"> <li>• Print</li> <li>• Face to face</li> <li>• Telephone</li> <li>• DVD</li> </ul>               | <p>“Multifactorial intervention”:</p> <ul style="list-style-type: none"> <li>• Individual medication review (draw chart)</li> <li>• Daily self-monitoring of BP x 3 months</li> <li>• 20 min DVD</li> <li>• Q2 week motivational interviewing follow up via phone x 12 weeks to support BP management and optimize medication SM</li> </ul> <p><i>Duration: 12 weeks</i><br/><i>Comparator: standard care</i></p> | <p>Physiological measures:</p> <ul style="list-style-type: none"> <li>• BP – no difference between groups</li> </ul> <p>Behaviors:</p> <ul style="list-style-type: none"> <li>• Medication adherence – no difference between groups</li> </ul>                                                                                                                                                             |  |
| Williams 2012 (43) | RCT | CKD 2-4 + DM + cardiovascular disease        | 78 (E = 40, C = 38) Age: 74.31 | <ul style="list-style-type: none"> <li>• Medication</li> <li>• Comorbidities</li> <li>• Other (i.e. self-efficacy)</li> </ul> | Nurse, interpreter | <ul style="list-style-type: none"> <li>• Print</li> <li>• Face to face</li> <li>• Telephone</li> <li>• PowerPoint slides</li> </ul> | <p>“Self-efficacy Medication Intervention (SEM)”:</p> <ul style="list-style-type: none"> <li>• Individual medication review – chart in English but interpreter wrote on medication boxes in patients language or used symbols</li> </ul>                                                                                                                                                                          | <p>Intervention specific:</p> <ul style="list-style-type: none"> <li>• Attrition rate to assess feasibility of study – high attrition</li> </ul> <p>Cognitions:</p> <ul style="list-style-type: none"> <li>• Medication self-efficacy – no difference between groups</li> </ul>                                                                                                                            |  |

## CKD self-management interventions

|                        |     |                                                |                                    |                                                                                                |                              |                                                                                                  |                                                                                                                                                                                                                                                                                                                                                                                                                                                                                                                                                                |                                                                                                                                                                                                                                              |  |
|------------------------|-----|------------------------------------------------|------------------------------------|------------------------------------------------------------------------------------------------|------------------------------|--------------------------------------------------------------------------------------------------|----------------------------------------------------------------------------------------------------------------------------------------------------------------------------------------------------------------------------------------------------------------------------------------------------------------------------------------------------------------------------------------------------------------------------------------------------------------------------------------------------------------------------------------------------------------|----------------------------------------------------------------------------------------------------------------------------------------------------------------------------------------------------------------------------------------------|--|
|                        |     |                                                |                                    |                                                                                                |                              |                                                                                                  | <ul style="list-style-type: none"> <li>Individual slide presentation (20 minutes) via interpreter (Greek, Italian, Vietnamese)</li> <li>Q2 week motivational interviewing follow-up via phone x 12 weeks</li> </ul> <i>Duration:</i> 12 weeks<br><i>Comparator:</i> standard care                                                                                                                                                                                                                                                                              | Health care: <ul style="list-style-type: none"> <li>Health care utilization – <i>no difference between groups</i></li> </ul>                                                                                                                 |  |
|                        |     |                                                |                                    |                                                                                                |                              |                                                                                                  |                                                                                                                                                                                                                                                                                                                                                                                                                                                                                                                                                                | Physiological measures: <ul style="list-style-type: none"> <li>Routine clinical lab surrogate measures – <i>no difference</i></li> </ul>                                                                                                     |  |
|                        |     |                                                |                                    |                                                                                                |                              |                                                                                                  |                                                                                                                                                                                                                                                                                                                                                                                                                                                                                                                                                                | Behaviors: <ul style="list-style-type: none"> <li>Medication adherence – <i>no difference</i></li> </ul>                                                                                                                                     |  |
|                        |     |                                                |                                    |                                                                                                |                              |                                                                                                  |                                                                                                                                                                                                                                                                                                                                                                                                                                                                                                                                                                | Individual outcomes: <ul style="list-style-type: none"> <li>General wellbeing – <i>no difference</i></li> </ul>                                                                                                                              |  |
| De Brito 2013 (44)     | RCT | CKD 3-5 + HTN (BP>130/80) + Bengali population | 56 (E = 28, C = 28) Age: 55.7-60.7 | <ul style="list-style-type: none"> <li>Diet/nutrition</li> </ul>                               | Dietician and Bengali worker | <ul style="list-style-type: none"> <li>Face to face</li> <li>Telephone</li> </ul>                | “Diet advice “: <ul style="list-style-type: none"> <li>Practical cooking &amp; education sessions in the community facilitated by a Bengali worker</li> <li>Followed by Q2 week phone calls to reinforce advice and set new targets</li> </ul> <i>Duration:</i> 6 months<br><i>Comparator:</i> Standard care                                                                                                                                                                                                                                                   | Physiological measures: <ul style="list-style-type: none"> <li>BP – <i>decreased by 8mmHg in E group</i></li> <li>24 hour urinary salt excretion – <i>decrease in E group</i></li> <li>eGFR – <i>no difference between groups</i></li> </ul> |  |
| Paes-Barreto 2013 (45) | RCT | CKD 3-5                                        | 89 (E = 43, C = 46) Age: 63.4      | <ul style="list-style-type: none"> <li>Diet/nutrition</li> </ul>                               | Dietician                    | <ul style="list-style-type: none"> <li>Print</li> <li>Face to face</li> <li>Telephone</li> </ul> | “Nutrition Education Program’: <ul style="list-style-type: none"> <li>Standard dietary counseling AND</li> <li>Education folder with recipes to replace salt with sodium free seasoning blends</li> <li>Individual 15-20 minute class</li> <li>Hands on session about protein rich food</li> <li>Hands on session using test tubes with the amount of salt in different foods</li> <li>4 monthly follow up visits</li> <li>Telephone call to address any doubts with dietary plan</li> </ul> <i>Duration:</i> 4 – 7 months<br><i>Comparator:</i> standard care | Behaviors: <ul style="list-style-type: none"> <li>Reduction in protein intake – <i>decreased</i></li> <li>Adherence to low protein diet – <i>effective</i></li> </ul>                                                                        |  |
|                        |     |                                                |                                    |                                                                                                |                              |                                                                                                  |                                                                                                                                                                                                                                                                                                                                                                                                                                                                                                                                                                | Physiological measures: <ul style="list-style-type: none"> <li>Body composition: waist circumference, body fat, BMI, mid-arm muscle circumference – <i>no change</i></li> <li>Serum albumin – <i>no change</i></li> </ul>                    |  |
| Blakeman 2014 (46)     | RCT | CKD 3                                          | 436 (E = 215, C = 221) Age: 72.1   | <ul style="list-style-type: none"> <li>General CKD knowledge</li> <li>Comorbidities</li> </ul> | Lay health worker            | <ul style="list-style-type: none"> <li>Print</li> <li>Website</li> <li>Telephone</li> </ul>      | “Information and telephone-guided access to community services’’: <ul style="list-style-type: none"> <li>Kidney Information Guidebook</li> </ul>                                                                                                                                                                                                                                                                                                                                                                                                               | Cognitions: <ul style="list-style-type: none"> <li>Positive &amp; active engagement in life (heiQ) – <i>no difference between groups</i></li> </ul>                                                                                          |  |



CKD self-management interventions

|                   |     |                                                       |                                       |                                                                                         |                                                                                                      |                                                                                             |                                                                                                                                                                                                                                                                                                                                                                                                                                                                                                            |                                                                                                                                                                                                   |  |
|-------------------|-----|-------------------------------------------------------|---------------------------------------|-----------------------------------------------------------------------------------------|------------------------------------------------------------------------------------------------------|---------------------------------------------------------------------------------------------|------------------------------------------------------------------------------------------------------------------------------------------------------------------------------------------------------------------------------------------------------------------------------------------------------------------------------------------------------------------------------------------------------------------------------------------------------------------------------------------------------------|---------------------------------------------------------------------------------------------------------------------------------------------------------------------------------------------------|--|
|                   |     |                                                       |                                       | <ul style="list-style-type: none"> <li>• Other (i.e. community resources)</li> </ul>    |                                                                                                      |                                                                                             | <ul style="list-style-type: none"> <li>• Patient-Led Assessment for Network Support “PLANS” booklet and interactive website – tailored access to community resources</li> <li>• Telephone guided help from a lay health worker</li> </ul> <p><i>Duration: 6 months</i><br/><i>Comparator: standard care</i></p>                                                                                                                                                                                            | <p>Physiological measures:</p> <ul style="list-style-type: none"> <li>• BP control – <i>better BP maintenance in E group</i></li> </ul>                                                           |  |
|                   |     |                                                       |                                       |                                                                                         |                                                                                                      |                                                                                             |                                                                                                                                                                                                                                                                                                                                                                                                                                                                                                            | <p>Individual outcomes:</p> <ul style="list-style-type: none"> <li>• Health related QOL (EuroQoL EQ-5D index) – <i>higher in E group</i></li> </ul>                                               |  |
| McManus 2014 (47) | RCT | HTN (BP>130/80) + CKD3 or DM or CHD                   | 555 (E = 277, C = 278) Age: 69.3-69.6 | <ul style="list-style-type: none"> <li>• Medication</li> <li>• Comorbidities</li> </ul> | General practitioner, patient                                                                        | <ul style="list-style-type: none"> <li>• Print</li> <li>• Face to face</li> </ul>           | <p>“Self-monitoring of BP and self-titration of medications”:</p> <ul style="list-style-type: none"> <li>• Self-monitoring of BP</li> <li>• Self-titration of medications following a 3-step plan designed by general practitioner and patient</li> </ul> <p><i>Duration: 12 months</i><br/><i>Comparator: standard care</i></p>                                                                                                                                                                           | <p>Physiological measures:</p> <ul style="list-style-type: none"> <li>• SBP at 12months – <i>no difference</i></li> </ul>                                                                         |  |
|                   |     |                                                       |                                       |                                                                                         |                                                                                                      |                                                                                             |                                                                                                                                                                                                                                                                                                                                                                                                                                                                                                            | <p>Health care:</p> <ul style="list-style-type: none"> <li>• Prescription of anti-hypertensive medications – <i>increased in both groups but greater significance in E group</i></li> </ul>       |  |
|                   |     |                                                       |                                       |                                                                                         |                                                                                                      |                                                                                             |                                                                                                                                                                                                                                                                                                                                                                                                                                                                                                            | <p>Symptom mgmt.:</p> <ul style="list-style-type: none"> <li>• Adverse effects – <i>no significant difference between groups</i></li> </ul>                                                       |  |
|                   |     |                                                       |                                       |                                                                                         |                                                                                                      |                                                                                             |                                                                                                                                                                                                                                                                                                                                                                                                                                                                                                            | <ul style="list-style-type: none"> <li>• Individual outcomes:</li> <li>• QOL - <i>no significant difference between groups</i></li> </ul>                                                         |  |
| Park 2014 (48)    | RCT | CKD3 + HTN + African American                         | 15 Age: 58.7                          | <ul style="list-style-type: none"> <li>• Other (i.e. meditation)</li> </ul>             | Principle investigator, patient                                                                      | <ul style="list-style-type: none"> <li>• Face to face</li> <li>• Audio recording</li> </ul> | <p>“Mindfulness meditation (MM)”</p> <ul style="list-style-type: none"> <li>• 14 min of pre-recorded guided MM using MP3 player &amp; headphones</li> </ul> <p><i>Duration: one session</i><br/><i>Comparator: BP education</i></p>                                                                                                                                                                                                                                                                        | <p>Physiological measures:</p> <ul style="list-style-type: none"> <li>• BP – <i>decrease in SBP/ DBP/ HR/ MAP</i></li> <li>• Muscle sympathetic nerve activity – <i>decreased</i></li> </ul>      |  |
| Howden 2015 (49)  | RCT | CKD 3-4 & >1 uncontrolled cardio-vascular risk factor | 72 (E = 36, C = 36) Age 60.2-62.0     | <ul style="list-style-type: none"> <li>• Physical activity</li> </ul>                   | Nurse practitioner, social worker, exercise physiologist, dietician, psychologist, diabetes educator | <ul style="list-style-type: none"> <li>• Print</li> <li>• Face to face</li> </ul>           | <p>“Exercise training and lifestyle intervention”:</p> <ul style="list-style-type: none"> <li>• Standard care AND</li> <li>• Detailed medical/ surgical history taken by nurse practitioner</li> <li>• Education about exercising safely: maintaining hydration, signs/ symptoms of abnormal response to exercise</li> <li>• If diabetic – education on hypoglycemia</li> <li>• Exercise prescription individualized on patient’s comorbid conditions</li> <li>• Goal = 150min/week of moderate</li> </ul> | <p>Physiological measures:</p> <ul style="list-style-type: none"> <li>• METS – <i>improved*</i></li> <li>• 6 minute walk distance – <i>improved*</i></li> <li>• BMI – <i>improved*</i></li> </ul> |  |

## CKD self-management interventions

|                   |     |                                                 |                                              |                                                                                                                                                                                                  |                                                            |                                                                                                                |                                                                                                                                                                                                                                                                                                                                                                                                                                                                                                                                                                                                                                                 |                                                                                                                                                                                                                                                                                                                                                                                                                                                                                                                                                    |  |
|-------------------|-----|-------------------------------------------------|----------------------------------------------|--------------------------------------------------------------------------------------------------------------------------------------------------------------------------------------------------|------------------------------------------------------------|----------------------------------------------------------------------------------------------------------------|-------------------------------------------------------------------------------------------------------------------------------------------------------------------------------------------------------------------------------------------------------------------------------------------------------------------------------------------------------------------------------------------------------------------------------------------------------------------------------------------------------------------------------------------------------------------------------------------------------------------------------------------------|----------------------------------------------------------------------------------------------------------------------------------------------------------------------------------------------------------------------------------------------------------------------------------------------------------------------------------------------------------------------------------------------------------------------------------------------------------------------------------------------------------------------------------------------------|--|
|                   |     |                                                 |                                              |                                                                                                                                                                                                  |                                                            |                                                                                                                | intensity exercise plus resistance training<br><ul style="list-style-type: none"> <li>• 8 weeks supervised, then 10 month home based</li> <li>• Patients got: exercise ball, resistance training booklet</li> <li>• Patients contacted regularly to monitor adherence to training</li> </ul> <i>Duration: 12 months</i><br><i>Comparator: standard care</i>                                                                                                                                                                                                                                                                                     |                                                                                                                                                                                                                                                                                                                                                                                                                                                                                                                                                    |  |
| Leehey 2016 (50)  | RCT | CKD 2-4 + DM2 + BMI>30 + persistent proteinuria | 36 (Exercise + diet = 18, Diet = 18) Age: 66 | <ul style="list-style-type: none"> <li>• Diet/nutrition</li> <li>• Physical activity</li> </ul>                                                                                                  | Personal trainer                                           | <ul style="list-style-type: none"> <li>• Face to face</li> <li>• Telephone</li> </ul>                          | <p>“Structured exercise program”:</p> <ul style="list-style-type: none"> <li>• Dietary counseling = baseline nutritional counseling with 9 follow-up phone calls (both groups) AND</li> <li>• Supervised exercise program 3x.week (60 min cardio plus 25-30 min resistance training)</li> <li>• Followed by home exercise phase: 3x/week x 60 min with weekly follow-up phone calls &amp; patient encouraged to meet trainer Q1 month</li> </ul> <i>Duration: 12 months</i><br><i>Comparator: diet counseling only</i>                                                                                                                          | <p>Physiological measures:</p> <ul style="list-style-type: none"> <li>• Urine protein to creatinine ratio – <i>no change at 52 weeks</i></li> <li>• Symptom limited and constant work rate treadmill time – <i>significant increase in diet + exercise group at 12 but not 52 weeks</i></li> <li>• Urine albumin to creatinine ratio – <i>no change</i></li> <li>• eGFR – <i>no change</i></li> <li>• Inflammation – <i>no change</i></li> <li>• Endothelial function – <i>no change</i></li> <li>• Body composition – <i>no change</i></li> </ul> |  |
| Montoya 2016 (30) | RCT | CKD 4                                           | 30 (E = 16, C = 14) Age: 67.9-68.3           | <ul style="list-style-type: none"> <li>• General CKD knowledge</li> <li>• Diet/nutrition</li> <li>• Medication</li> <li>• Modalities</li> <li>• Other (i.e. putting affairs in order)</li> </ul> | Nephrologist, nurse practitioner, dietician, social worker | <ul style="list-style-type: none"> <li>• Print</li> <li>• Face to face</li> <li>• PowerPoint slides</li> </ul> | <p>“Nurse practitioner facilitated CKD group visit”:</p> <ul style="list-style-type: none"> <li>• Binder with section on individual labs, another section for topics of groups visits</li> <li>• Six 1.5-2 hour long monthly group visits of 8 patients (~1/2 had family members with them)</li> <li>• 3 visits done in conjunction with nephrologist’s examinations (1<sup>st</sup> half = apt, 2<sup>nd</sup> half = education)</li> <li>• 3 visits = education only</li> <li>• Interactive discussion at each visit</li> <li>• Slide presentation (30 – 45 minutes)</li> </ul> <i>Duration: 9 months</i><br><i>Comparator: standard care</i> | <p>Cognitions:</p> <ul style="list-style-type: none"> <li>• CKD knowledge – <i>improved in both groups</i></li> <li>• Self-efficacy/disease SM – <i>upward trend in E group</i></li> </ul>                                                                                                                                                                                                                                                                                                                                                         |  |
| <b>Non-RCT</b>    |     |                                                 |                                              |                                                                                                                                                                                                  |                                                            |                                                                                                                |                                                                                                                                                                                                                                                                                                                                                                                                                                                                                                                                                                                                                                                 |                                                                                                                                                                                                                                                                                                                                                                                                                                                                                                                                                    |  |

CKD self-management interventions

|                                                                            |                                        |     |          |                                         |                                                                                                                                                                                                                                                 |                                                              |                                                                                                                |                                                                                                                                                                                                                                                                                                                                         |                                                                                                                                                                                                              |  |
|----------------------------------------------------------------------------|----------------------------------------|-----|----------|-----------------------------------------|-------------------------------------------------------------------------------------------------------------------------------------------------------------------------------------------------------------------------------------------------|--------------------------------------------------------------|----------------------------------------------------------------------------------------------------------------|-----------------------------------------------------------------------------------------------------------------------------------------------------------------------------------------------------------------------------------------------------------------------------------------------------------------------------------------|--------------------------------------------------------------------------------------------------------------------------------------------------------------------------------------------------------------|--|
| 1<br>2<br>3<br>4<br>5<br>6<br>7<br>8<br>9<br>10<br>11<br>12<br>13<br>14    | Robinson<br>1988<br>(51)               | Obs | CKD      | 25<br>Age: NR                           | <ul style="list-style-type: none"> <li>• General CKD knowledge</li> <li>• Diet/nutrition</li> <li>• Medication</li> <li>• Other (i.e. self-care activities)</li> <li>• Modalities</li> </ul>                                                    | NR                                                           | <ul style="list-style-type: none"> <li>• Face to face</li> </ul>                                               | <p>“Renal Bingo”:</p> <ul style="list-style-type: none"> <li>• Bingo game format/ group gaming technique</li> <li>• Provision of refreshments &amp; prizes for motivation</li> <li>• Refreshments made with dietician consultation, reinforced dietary regimen</li> </ul> <p>Duration: one session<br/>Comparator: none</p>             | <p>Cognitions:</p> <ul style="list-style-type: none"> <li>• Information was gained or reinforced – <i>desirable outcome</i></li> <li>• Met a variety of learning needs – <i>desirable outcome</i></li> </ul> |  |
| 15<br>16<br>17<br>18<br>19<br>20<br>21<br>22<br>23<br>24                   | Klang<br>1998<br>(52)                  | QE  | CKD 4-5  | 56<br>(E = 28,<br>C = 28)<br>Age: 54-58 | <ul style="list-style-type: none"> <li>• General CKD knowledge</li> <li>• Diet/nutrition</li> <li>• Physical activity</li> <li>• Modalities</li> <li>• Other (i.e. psychosocial - impact of CKD on economy, family, and social life)</li> </ul> | Nurse, physician, social worker, dietician, physio-therapist | <ul style="list-style-type: none"> <li>• Face to face</li> </ul>                                               | <p>“Pre-dialysis patient education”:</p> <ul style="list-style-type: none"> <li>• Four 2-hour sessions of group teaching with a classroom approach</li> <li>• Individual support follow-up by nephrology team member</li> </ul> <p>Duration: 4 sessions<br/>Comparator: standard care</p>                                               | <p>Individual outcomes:</p> <ul style="list-style-type: none"> <li>• Functional and emotional wellbeing – <i>better in E group*</i></li> </ul>                                                               |  |
| 25<br>26<br>27<br>28<br>29<br>30<br>31<br>32<br>33<br>34<br>35<br>36<br>37 | Cupisiti<br>2002<br>(53)               | PP  | CKD 3b-5 | 20<br>Age: NR                           | <ul style="list-style-type: none"> <li>• Diet/nutrition</li> </ul>                                                                                                                                                                              | NR                                                           | <ul style="list-style-type: none"> <li>• Print</li> </ul>                                                      | <p>“Vegetarian diet”:</p> <ul style="list-style-type: none"> <li>• Alternate between animal based conventional low protein diet &amp; a vegetable based low protein diet</li> <li>• Booklets explaining general guidelines &amp; features of the diet</li> </ul> <p>Duration: one session<br/>Comparator: conventional protein diet</p> | <p>Individual outcomes:</p> <ul style="list-style-type: none"> <li>• Opinions on diet – <i>90% enjoyed</i></li> </ul>                                                                                        |  |
| 38<br>39<br>40<br>41<br>42                                                 | Gutierrez<br>Vilaplana<br>2007<br>(57) | PP  | CKD      | 24<br>Age: 64.5                         | <ul style="list-style-type: none"> <li>• General CKD knowledge</li> <li>• Diet/nutrition</li> <li>• Modalities</li> </ul>                                                                                                                       | Nurse, patient volunteers                                    | <ul style="list-style-type: none"> <li>• Print</li> <li>• Face to face</li> <li>• PowerPoint slides</li> </ul> | <p>“Education Intervention”</p> <ul style="list-style-type: none"> <li>• 8 2-hour classes</li> <li>• Didactic and discussion</li> </ul> <p>Duration: 6 months</p>                                                                                                                                                                       | <p>Cognitions:</p> <ul style="list-style-type: none"> <li>• Improvement in knowledge of CKD</li> </ul>                                                                                                       |  |

## CKD self-management interventions

|                  |     |       |                 |                                                                                    |                                               |                                          |                                                                                                                                                                                                                                                                                                                                                                                              |                                                                                                               |   |
|------------------|-----|-------|-----------------|------------------------------------------------------------------------------------|-----------------------------------------------|------------------------------------------|----------------------------------------------------------------------------------------------------------------------------------------------------------------------------------------------------------------------------------------------------------------------------------------------------------------------------------------------------------------------------------------------|---------------------------------------------------------------------------------------------------------------|---|
|                  |     |       |                 | • Other                                                                            |                                               |                                          | <i>Comparator: none</i>                                                                                                                                                                                                                                                                                                                                                                      |                                                                                                               |   |
|                  |     |       |                 |                                                                                    |                                               |                                          |                                                                                                                                                                                                                                                                                                                                                                                              | Behaviors:                                                                                                    |   |
|                  |     |       |                 |                                                                                    |                                               |                                          |                                                                                                                                                                                                                                                                                                                                                                                              | • Modified lifestyle, diet                                                                                    | ● |
|                  |     |       |                 |                                                                                    |                                               |                                          |                                                                                                                                                                                                                                                                                                                                                                                              | Intervention specific:                                                                                        |   |
|                  |     |       |                 |                                                                                    |                                               |                                          |                                                                                                                                                                                                                                                                                                                                                                                              | • Reduction of stress, fear                                                                                   | ● |
|                  |     |       |                 |                                                                                    |                                               |                                          |                                                                                                                                                                                                                                                                                                                                                                                              | • Improvement in therapeutic relationships with healthcare providers, companions and multi-disciplinary team. | ● |
| Pagels 2008 (55) | Obs | CKD   | 58<br>Age: 65   | • General CKD knowledge                                                            | Nurse                                         | • Print                                  | • A diary to promote disease related knowledge, involvement and self-care ability and to promote cooperation between patient and nurse<br><i>Duration: 12 months</i><br><i>Comparator: none</i>                                                                                                                                                                                              | Cognitions:                                                                                                   | ● |
|                  |     |       |                 |                                                                                    |                                               |                                          |                                                                                                                                                                                                                                                                                                                                                                                              | • Participation, self-care, and disease related knowledge                                                     | ● |
|                  |     |       |                 |                                                                                    |                                               |                                          |                                                                                                                                                                                                                                                                                                                                                                                              | Intervention specific:                                                                                        |   |
|                  |     |       |                 |                                                                                    |                                               |                                          |                                                                                                                                                                                                                                                                                                                                                                                              | • Use of diary                                                                                                | ● |
|                  |     |       |                 |                                                                                    |                                               |                                          |                                                                                                                                                                                                                                                                                                                                                                                              | • Suitability for teaching purposes                                                                           | ● |
| Yen 2008 (61)    | PP  | CKD 3 | 66<br>Age: 67.4 | • General CKD knowledge<br>• Diet/nutrition<br>• Physical activity<br>• Medication | Nephrologist, nurse, dietician, social worker | • Print<br>• Face to face<br>• Telephone | “Educational intervention”:<br>• Handouts<br>• One 150 min workshop<br>• Individual consults Q6 month with nurse<br>• Phone number provided to participants for questions<br>• Desserts recommended by dietician given at workshop for educational purposes, lunch boxes designed by dietician given out at the end of the workshop<br><i>Duration: 12 months</i><br><i>Comparator: None</i> | Cognitions:                                                                                                   | ● |
|                  |     |       |                 |                                                                                    |                                               |                                          |                                                                                                                                                                                                                                                                                                                                                                                              | • QOL (WHOQOL-BREF Taiwan version) – <i>global increase</i>                                                   | ● |
|                  |     |       |                 |                                                                                    |                                               |                                          |                                                                                                                                                                                                                                                                                                                                                                                              | • Knowledge of renal function protection (checklist made by investigators) – <i>no change</i>                 | ● |
|                  |     |       |                 |                                                                                    |                                               |                                          |                                                                                                                                                                                                                                                                                                                                                                                              | Physiological measures:                                                                                       | ● |
|                  |     |       |                 |                                                                                    |                                               |                                          |                                                                                                                                                                                                                                                                                                                                                                                              | • Creatinine – <i>no change</i>                                                                               | ● |
|                  |     |       |                 |                                                                                    |                                               |                                          |                                                                                                                                                                                                                                                                                                                                                                                              | • BUN – <i>no change</i>                                                                                      | ● |
|                  |     |       |                 |                                                                                    |                                               |                                          |                                                                                                                                                                                                                                                                                                                                                                                              | • GFR – <i>no change</i>                                                                                      | ● |
|                  |     |       |                 |                                                                                    |                                               |                                          |                                                                                                                                                                                                                                                                                                                                                                                              | • Body weight – <i>no change</i>                                                                              | ● |
|                  |     |       |                 |                                                                                    |                                               |                                          |                                                                                                                                                                                                                                                                                                                                                                                              | • Muscle weight – <i>no change</i>                                                                            | ● |
|                  |     |       |                 |                                                                                    |                                               |                                          |                                                                                                                                                                                                                                                                                                                                                                                              | • % Body fat – <i>no change</i>                                                                               | ● |
|                  |     |       |                 |                                                                                    |                                               |                                          |                                                                                                                                                                                                                                                                                                                                                                                              | • Waist to hip ratio – <i>significant decrease in E group</i>                                                 | ● |
|                  |     |       |                 |                                                                                    |                                               |                                          |                                                                                                                                                                                                                                                                                                                                                                                              | • BMI – <i>significant decrease in E group</i>                                                                | ● |
|                  |     |       |                 |                                                                                    |                                               |                                          |                                                                                                                                                                                                                                                                                                                                                                                              | • BP – <i>no change</i>                                                                                       | ● |

CKD self-management interventions

|                                                                   |                               |     |         |                                             |                                                                                                                                                                                                                                           |                                                                                                           |                                                                                   |                                                                                                                                                                                                                                                                                                                                                                                                                                                                                             |                                                                                                                                                                                                                       |                                                                                       |
|-------------------------------------------------------------------|-------------------------------|-----|---------|---------------------------------------------|-------------------------------------------------------------------------------------------------------------------------------------------------------------------------------------------------------------------------------------------|-----------------------------------------------------------------------------------------------------------|-----------------------------------------------------------------------------------|---------------------------------------------------------------------------------------------------------------------------------------------------------------------------------------------------------------------------------------------------------------------------------------------------------------------------------------------------------------------------------------------------------------------------------------------------------------------------------------------|-----------------------------------------------------------------------------------------------------------------------------------------------------------------------------------------------------------------------|---------------------------------------------------------------------------------------|
| 1<br>2<br>3<br>4<br>5<br>6<br>7<br>8<br>9<br>10<br>11<br>12<br>13 | Gutierrez Vilaplana 2009 (54) | PP  | CKD 4-5 | 41<br>Age: 60.56                            | <ul style="list-style-type: none"> <li>• General CKD knowledge</li> <li>• Diet/nutrition</li> <li>• Physical activity</li> <li>• Modalities</li> <li>• Other (i.e. psychosocial - impact of CKD family, finances, social life)</li> </ul> | Nurse, physician, technician, 3 expert patients                                                           | <ul style="list-style-type: none"> <li>• Print</li> <li>• Face to face</li> </ul> | <p>“Teaching group”:</p> <ul style="list-style-type: none"> <li>• Six 2-hour monthly group education sessions</li> <li>• Booklet for future reference</li> </ul> <p><i>Duration:</i> 6 months<br/><i>Comparator:</i> None</p>                                                                                                                                                                                                                                                               | <p>Cognitions:</p> <ul style="list-style-type: none"> <li>• Anxiety – <i>decreased</i></li> <li>• Fear – <i>more control of fear response</i></li> <li>• Stress – <i>decreased</i></li> </ul>                         |    |
| 14<br>15<br>16<br>17<br>18<br>19<br>20                            | Wu 2009 (58)                  | QE  | CKD 3-5 | 573<br>(E = 287, Cohort = 286)<br>Age: 63.4 | <ul style="list-style-type: none"> <li>• General CKD knowledge</li> <li>• Diet/nutrition</li> <li>• Medication</li> <li>• Lifestyle</li> </ul>                                                                                            | Nurse, social worker, dietician, HD/PD patient volunteers, physicians                                     | <ul style="list-style-type: none"> <li>• Face to face</li> </ul>                  | <p>“Multidisciplinary pre-dialysis education (MPE)”:</p> <ul style="list-style-type: none"> <li>• Individual lectures, content based on CKD stage</li> <li>• Dietary counseling biannually</li> </ul> <p><i>Duration:</i> 12 months<br/><i>Comparator:</i> standard care</p>                                                                                                                                                                                                                | <p>Health status:</p> <ul style="list-style-type: none"> <li>• ESRD warranting RRT – <i>13.9% in E group vs 43% in C group</i></li> <li>• All cause mortality – <i>1.7% in E group vs 10.1% in C group</i></li> </ul> |    |
| 21<br>22<br>23<br>24<br>25<br>26<br>27<br>28<br>29<br>30<br>31    | Wierdsma 2011 (59)            | QE  | CKD     | 54<br>(E = 28, C = 26)<br>Age: 55-59        | <ul style="list-style-type: none"> <li>• Medication</li> </ul>                                                                                                                                                                            | Nurse practitioner                                                                                        | <ul style="list-style-type: none"> <li>• Face to face</li> <li>• Print</li> </ul> | <p>“Motivational interviewing”:</p> <ul style="list-style-type: none"> <li>• Counseling by nurse practitioner (in addition to care by nephrologist) using motivational interviewing</li> <li>• Using the “Long-Term Medication Behavior Self-Efficacy Scale (LTMBSES)” – areas with score &lt;5 were identified and then up to 5 areas (picked by patient) were discussed and solutions and goals were set</li> </ul> <p><i>Duration:</i> 6 months<br/><i>Comparator:</i> standard care</p> | <p>Cognitions:</p> <ul style="list-style-type: none"> <li>• LTMBSES – <i>difference in mean self-efficacy score at post-test</i></li> </ul>                                                                           |    |
| 32<br>33<br>34<br>35<br>36<br>37<br>38<br>39<br>40                | Aguilera Florez 2012 (60)     | Obs | CKD     | 19<br>Age: 58                               | <ul style="list-style-type: none"> <li>• General CKD knowledge</li> <li>• Diet/nutrition</li> <li>• Medication</li> <li>• Symptom management</li> <li>• Physical activity</li> <li>• Modalities</li> <li>• Other</li> </ul>               | Nurse, physio-therapist, dietician, pharmacist, psychologist, coordinators, nephrologist, patient mentors | <ul style="list-style-type: none"> <li>• Face to face</li> </ul>                  | <p>“Escuela ERCA”:</p> <ul style="list-style-type: none"> <li>• 7 1.5-hour multi-disciplinary group education sessions held biweekly</li> <li>• Up to 10 patients per group with family members</li> <li>• Didactic plus discussion format</li> </ul> <p><i>Duration:</i> Not reported<br/><i>Comparator:</i> None</p>                                                                                                                                                                      | <p>Cognitions:</p> <ul style="list-style-type: none"> <li>• Knowledge</li> <li>• Anxiety - <i>increased</i></li> </ul>                                                                                                |  |
|                                                                   |                               |     |         |                                             |                                                                                                                                                                                                                                           |                                                                                                           |                                                                                   |                                                                                                                                                                                                                                                                                                                                                                                                                                                                                             | <p>Individual outcomes:</p> <ul style="list-style-type: none"> <li>• Satisfaction in group therapy</li> </ul>                                                                                                         |  |

CKD self-management interventions

1  
2  
3  
4  
5  
6  
7  
8  
9  
10  
11  
12  
13  
14  
15  
16  
17  
18  
19  
20  
21  
22  
23  
24  
25  
26  
27  
28  
29  
30  
31  
32  
33  
34  
35  
36  
37  
38  
39  
40  
41  
42  
43  
44  
45  
46  
47

For peer review only

|                       |    |         |                                                      |                                                                                                                                                                                        |                             |                                                                                                        |                                                                                                                                                                                                                                                                                                                                                                                                                                                                                                                                                                    |                                                                                                                                                                                                                                                                                                                                                                                                                                                                                                                                                                      |   |   |   |
|-----------------------|----|---------|------------------------------------------------------|----------------------------------------------------------------------------------------------------------------------------------------------------------------------------------------|-----------------------------|--------------------------------------------------------------------------------------------------------|--------------------------------------------------------------------------------------------------------------------------------------------------------------------------------------------------------------------------------------------------------------------------------------------------------------------------------------------------------------------------------------------------------------------------------------------------------------------------------------------------------------------------------------------------------------------|----------------------------------------------------------------------------------------------------------------------------------------------------------------------------------------------------------------------------------------------------------------------------------------------------------------------------------------------------------------------------------------------------------------------------------------------------------------------------------------------------------------------------------------------------------------------|---|---|---|
| Choi 2012 (61)        | QE | CKD 1-5 | 61<br>(E = 31,<br>C = 30)<br>Age:<br>53.93-<br>58.33 | <ul style="list-style-type: none"> <li>• General CKD knowledge</li> <li>• Diet/nutrition</li> <li>• Modalities</li> <li>• Other (i.e. understanding and compliance with SM)</li> </ul> | Physician, nurse, dietician | <ul style="list-style-type: none"> <li>• Face to face</li> <li>• PowerPoint slides</li> </ul>          | <p>“Face-to-face SM program”:</p> <ul style="list-style-type: none"> <li>• 90 minute lecture with slides (3 – 5 people/group)</li> <li>• 20 minute individual consult</li> <li>• 1 week later individual reinforcement education and consultation</li> </ul> <p>Duration: 2 sessions<br/>Comparator: general maintenance</p>                                                                                                                                                                                                                                       | <p>Cognitions:</p> <ul style="list-style-type: none"> <li>• Knowledge of CKD scale – increase &gt; in E group</li> </ul> <p>Behaviors:</p> <ul style="list-style-type: none"> <li>• Self-care practice scale for CKD patients – no difference between E group and C group but did increase over time for both groups</li> </ul> <p>Physiological measures:</p> <ul style="list-style-type: none"> <li>• BUN/Creatinine – no change</li> <li>• Na/K – no change</li> <li>• Ca/PO4 – no change</li> <li>• Hemoglobin – no change</li> <li>• GFR – no change</li> </ul> | ● | ● | ● |
| Kao 2012 (27)         | QE | CKD 1-4 | 94<br>(E = 45,<br>C = 49)<br>Age: 73.17              | <ul style="list-style-type: none"> <li>• General CKD knowledge</li> <li>• Physical activity</li> </ul>                                                                                 | Instructor                  | <ul style="list-style-type: none"> <li>• Print</li> <li>• Face to face</li> <li>• Telephone</li> </ul> | <p>“Exercise education intervention”:</p> <ul style="list-style-type: none"> <li>• Manual</li> <li>• 1.5 hour exercise/ health education course</li> <li>• Drafted exercise contract &amp; exercise programs</li> <li>• Follow up phone calls</li> <li>• 1x/month for patients in maintenance phase</li> <li>• 2x/month for patients in action/ prep stages</li> <li>• 4x/month for patients at pre-contemplation/ contemplation stages</li> <li>• Goal: workout 3-5x/week x 30min for 3 months</li> </ul> <p>Duration: 4 months<br/>Comparator: standard care</p> | <p>Behaviors:</p> <ul style="list-style-type: none"> <li>• Exercise behavior – improved in E group</li> </ul> <p>Cognitions:</p> <ul style="list-style-type: none"> <li>• Depression – score decreased (i.e. improved) in E group</li> </ul> <p>Symptom management:</p> <ul style="list-style-type: none"> <li>• Fatigue - score decreased in E group</li> </ul>                                                                                                                                                                                                     | ● | ● | ● |
| Diamantidis 2013 (62) | PP | CKD 3-5 | 108<br>Age: 64                                       | <ul style="list-style-type: none"> <li>• Diet/nutrition</li> <li>• Medication</li> </ul>                                                                                               | Online tool                 | <ul style="list-style-type: none"> <li>• Website</li> </ul>                                            | <p>“Disease-specific safety information”:</p> <ul style="list-style-type: none"> <li>• Safe kidney care website – patient/family member and provider portals</li> <li>• Education modules displayed in circular distribution to avoid prioritization of topics</li> </ul> <p>Duration: Not applicable</p>                                                                                                                                                                                                                                                          | <p>Intervention specific:</p> <ul style="list-style-type: none"> <li>• First entry into website - &lt;30% of participants entered within 365 days (total follow up period)</li> <li>• Average dwell time on the website – 7 minutes</li> <li>• Modules were ranked by frequency of selection - The three most</li> </ul>                                                                                                                                                                                                                                             | ● |   |   |

## CKD self-management interventions

|                  |    |                                |                 |                                                                                                                                                                                                                                                           |             |                                                                                                                 |                                                                                                                                                                                                                                                                                                                                                           |                                                                                                                                                                                                             |                                                                                       |
|------------------|----|--------------------------------|-----------------|-----------------------------------------------------------------------------------------------------------------------------------------------------------------------------------------------------------------------------------------------------------|-------------|-----------------------------------------------------------------------------------------------------------------|-----------------------------------------------------------------------------------------------------------------------------------------------------------------------------------------------------------------------------------------------------------------------------------------------------------------------------------------------------------|-------------------------------------------------------------------------------------------------------------------------------------------------------------------------------------------------------------|---------------------------------------------------------------------------------------|
|                  |    |                                |                 |                                                                                                                                                                                                                                                           |             |                                                                                                                 | <i>Comparator: None</i>                                                                                                                                                                                                                                                                                                                                   | <i>frequently visited pages were “Renal function calculator”, “Pills to avoid”, and “Foods to avoid”</i>                                                                                                    |                                                                                       |
| Kazawa 2013 (31) | PP | CKD 3-4 (diabetic nephropathy) | 30<br>Age: 67   | <ul style="list-style-type: none"> <li>Diet/nutrition</li> <li>Medications</li> <li>Physical activity</li> <li>Comorbidities</li> <li>Other (i.e. stress management, identify supporters (family) &amp; how they can contribute, goal setting)</li> </ul> | Nurse       | <ul style="list-style-type: none"> <li>Print</li> <li>Face to face</li> <li>Telephone</li> <li>Email</li> </ul> | <p>“SM skills program”:</p> <ul style="list-style-type: none"> <li>Textbook</li> <li>Daily journal</li> <li>Four 1-hour face-to-face sessions Q2 weeks at outpatient clinic or in home</li> <li>Two 30 minute phone or email sessions Q1 month</li> <li>Then Q1 month phone calls</li> </ul> <p><i>Duration: 6 months</i><br/><i>Comparator: None</i></p> | <p>Individual outcomes:</p> <ul style="list-style-type: none"> <li>QOL – <i>self-efficacy and SM behaviors improved</i></li> </ul>                                                                          |    |
|                  |    |                                |                 |                                                                                                                                                                                                                                                           |             |                                                                                                                 |                                                                                                                                                                                                                                                                                                                                                           | <p>Physiological measures:</p> <ul style="list-style-type: none"> <li>Renal function – <i>no change</i></li> <li>Hemoglobin A1c – <i>decreased post intervention</i></li> </ul>                             |    |
| Lin 2013 (63)    | PP | CKD 1-3a                       | 37<br>Age 67.42 | <ul style="list-style-type: none"> <li>Other (i.e. self-regulation/ self-management topics)</li> </ul>                                                                                                                                                    | Nurse       | <ul style="list-style-type: none"> <li>Print</li> <li>Face to face</li> <li>Video</li> </ul>                    | <p>“SM program”:</p> <ul style="list-style-type: none"> <li>Self-monitoring workbook</li> <li>5 week SM program</li> <li>Weekly 90 minute face- to-face group sessions (6-8 patients)</li> <li>CKD SM video about self-regulation</li> </ul> <p><i>Duration: 5 weeks</i><br/><i>Comparator: None</i></p>                                                  | <p>Cognitions:</p> <ul style="list-style-type: none"> <li>CKD self-efficacy – <i>increased</i></li> </ul>                                                                                                   |    |
|                  |    |                                |                 |                                                                                                                                                                                                                                                           |             |                                                                                                                 |                                                                                                                                                                                                                                                                                                                                                           | <p>Behaviors:</p> <ul style="list-style-type: none"> <li>CKD SM – <i>no change</i></li> </ul>                                                                                                               |    |
|                  |    |                                |                 |                                                                                                                                                                                                                                                           |             |                                                                                                                 |                                                                                                                                                                                                                                                                                                                                                           | <p>Physiological measures:</p> <ul style="list-style-type: none"> <li>Creatinine – <i>marginally significant decrease</i></li> <li>GFR – <i>remained stable</i></li> </ul>                                  |    |
| Murali 2013 (28) | PP | CKD 4                          | 12<br>Age: 68   | <ul style="list-style-type: none"> <li>Diet/nutrition</li> </ul>                                                                                                                                                                                          | Online tool | <ul style="list-style-type: none"> <li>Website</li> </ul>                                                       | <p>“Dietary assessment and evaluation tool”:</p> <ul style="list-style-type: none"> <li>Self-administered</li> <li>Obtains 24 hour food history</li> <li>Then evaluates diet based on KDOQI GL</li> <li>Then share general tips for success</li> </ul>                                                                                                    | <p>Cognitions:</p> <ul style="list-style-type: none"> <li>Change in patients’ self-efficacy to adhere to KDOQI GL after single exposure to the tool – <i>3 worsened, 3 improved, 6 no change</i></li> </ul> |  |

## CKD self-management interventions

|                        |    |                                                             |                                     |                                                                                                                                                                                        |                           |                                                                                   |                                                                                                                                                                                                                                                                                                                                                                                                                                                                               |                                                                                                                                                                                                                                                                                      |                                                                                       |
|------------------------|----|-------------------------------------------------------------|-------------------------------------|----------------------------------------------------------------------------------------------------------------------------------------------------------------------------------------|---------------------------|-----------------------------------------------------------------------------------|-------------------------------------------------------------------------------------------------------------------------------------------------------------------------------------------------------------------------------------------------------------------------------------------------------------------------------------------------------------------------------------------------------------------------------------------------------------------------------|--------------------------------------------------------------------------------------------------------------------------------------------------------------------------------------------------------------------------------------------------------------------------------------|---------------------------------------------------------------------------------------|
|                        |    |                                                             |                                     |                                                                                                                                                                                        |                           |                                                                                   | <ul style="list-style-type: none"> <li>• A report is generated for the nephrologist to guide discussion with patients</li> </ul> <p><i>Duration:</i> single exposure<br/><i>Comparator:</i> None</p>                                                                                                                                                                                                                                                                          | <p>Intervention specific:</p> <ul style="list-style-type: none"> <li>• Tool acceptability – <i>well accepted</i></li> <li>• Congruence of patient and provider attitudes – <i>incongruence in 4/10 cases where provider states used report but patient doesn't verify</i></li> </ul> |    |
| Nauta 2013 (32)        | PP | CKD                                                         | 22<br>Age: 55.2-59.8                | <ul style="list-style-type: none"> <li>• Diet/nutrition</li> <li>• Physical activity</li> <li>• Lifestyle</li> </ul>                                                                   | Online tool               | <ul style="list-style-type: none"> <li>• Print</li> <li>• Website</li> </ul>      | <p>“Lifestyle management tool”:</p> <ul style="list-style-type: none"> <li>• 33-page quick start guide provided</li> <li>• Patients had access to site for 4 months – patient choice to frequency of visits to website</li> <li>• <i>Duration:</i> 4 months</li> <li>• <i>Comparator:</i> None</li> </ul>                                                                                                                                                                     | <p>Cognitions:</p> <ul style="list-style-type: none"> <li>• Self-efficacy – <i>limited effectiveness</i></li> </ul>                                                                                                                                                                  |    |
|                        |    |                                                             |                                     |                                                                                                                                                                                        |                           |                                                                                   |                                                                                                                                                                                                                                                                                                                                                                                                                                                                               | <p>Behaviors:</p> <ul style="list-style-type: none"> <li>• SM – <i>limited effectiveness</i></li> </ul>                                                                                                                                                                              |    |
| Thomas 2013 (33)       | MM | Diabetic nephropathy (DM + micro-albuminuria)               | 176<br>(E = 116, C = 60)<br>Age: NR | <ul style="list-style-type: none"> <li>• General CKD knowledge</li> <li>• Comorbidities</li> <li>• Lifestyle</li> </ul>                                                                | NR                        | <ul style="list-style-type: none"> <li>• Print</li> <li>• DVD</li> </ul>          | <p>“SM package”:</p> <ul style="list-style-type: none"> <li>• Written materials</li> <li>• 20 minute DVD</li> <li>• Self-monitoring diary</li> <li>• Fridge magnet with key messages</li> <li>• BP monitor if needed</li> </ul> <p><i>Duration:</i> One session<br/><i>Comparator:</i> standard care</p>                                                                                                                                                                      | <p>Physiological measures:</p> <ul style="list-style-type: none"> <li>• BP – <i>no statistically sig difference</i></li> <li>• Hemoglobin A1c – <i>no change</i></li> <li>• BMI – <i>no change</i></li> </ul>                                                                        |    |
| Walker 2013 (64)       | PP | CKD with high risk of progression + DM2 + HTN + albuminuria | 52<br>Age: 57.5                     | <ul style="list-style-type: none"> <li>• Diet/nutrition</li> <li>• Medication</li> <li>• Symptom management</li> <li>• Physical activity</li> <li>• Other (i.e. compliance)</li> </ul> | Nurse, nurse practitioner | <ul style="list-style-type: none"> <li>• Print</li> <li>• Face to face</li> </ul> | <p>“Nurse practitioner intervention in primary care setting”:</p> <ul style="list-style-type: none"> <li>• SM booklet</li> <li>• Initial assessment of lifestyle behaviors, SM practice, health/medication knowledge</li> <li>• Individual education</li> <li>• Individualized patient management plan given at end of 12 weeks</li> <li>• Q2 week 30 minute long assessments &amp; review x 12 weeks</li> </ul> <p><i>Duration:</i> 12 weeks<br/><i>Comparator:</i> None</p> | <p>Behaviors:</p> <ul style="list-style-type: none"> <li>• SM (Partners in Health (PIH) instrument) – <i>had change in certain domains</i></li> </ul>                                                                                                                                |    |
| Wright Nunes 2013 (65) | QE | CKD 1-5                                                     | 556<br>(E = 155, Cohort = 401)      | <ul style="list-style-type: none"> <li>• General CKD knowledge</li> <li>• Diet/nutrition</li> <li>• Medication</li> </ul>                                                              | Nephrology fellows        | <ul style="list-style-type: none"> <li>• Print</li> <li>• Face to face</li> </ul> | <p>“Physician-delivered education too”</p> <ul style="list-style-type: none"> <li>• 1-page intervention worksheet delivered during clinic visits – take 1-2 minutes to administer</li> </ul>                                                                                                                                                                                                                                                                                  | <p>Cognitions:</p> <ul style="list-style-type: none"> <li>• Kidney specific knowledge – <i>associated with increase in knowledge</i></li> </ul>                                                                                                                                      |  |



CKD self-management interventions

|                   |    |                                                             |                                   |                                                                                                                                                                                                   |                                                                     |                                                                                                                     |                                                                                                                                                                                                                                                                                                                            |                                                                                                                                                                                                                                                                                                                             |  |
|-------------------|----|-------------------------------------------------------------|-----------------------------------|---------------------------------------------------------------------------------------------------------------------------------------------------------------------------------------------------|---------------------------------------------------------------------|---------------------------------------------------------------------------------------------------------------------|----------------------------------------------------------------------------------------------------------------------------------------------------------------------------------------------------------------------------------------------------------------------------------------------------------------------------|-----------------------------------------------------------------------------------------------------------------------------------------------------------------------------------------------------------------------------------------------------------------------------------------------------------------------------|--|
|                   |    |                                                             | Age: 57                           | <ul style="list-style-type: none"> <li>Physical activity</li> <li>Lifestyle</li> <li>Comorbidities</li> <li>Other (i.e. compliance)</li> </ul>                                                    |                                                                     |                                                                                                                     | <i>Duration:</i> one session<br><i>Comparator:</i> “historical group” – who developed sheet                                                                                                                                                                                                                                | Intervention specific: <ul style="list-style-type: none"> <li>Feasibility of intervention – <i>physicians found it useful and efficient but had concern regarding some of the talking points</i></li> </ul>                                                                                                                 |  |
| Walker 2014 (24)  | PP | CKD with high risk of progression + DM2 + HTN + albuminuria | 52<br>Age: 57.5                   | <ul style="list-style-type: none"> <li>See Walker (65)</li> </ul>                                                                                                                                 | Nurse, nurse practitioner                                           | <ul style="list-style-type: none"> <li>See Walker (65)</li> </ul>                                                   | <ul style="list-style-type: none"> <li>See Walker (65)</li> </ul>                                                                                                                                                                                                                                                          | Physiological measures: <ul style="list-style-type: none"> <li>Albuminuria – <i>improved</i></li> <li>GFR – <i>no change</i></li> <li>5 year absolute cardiovascular risk – <i>improved</i></li> <li>BP – <i>improved</i></li> <li>Total cholesterol – <i>improved</i></li> <li>Hemoglobin A1c – <i>improved</i></li> </ul> |  |
|                   |    |                                                             |                                   |                                                                                                                                                                                                   |                                                                     |                                                                                                                     |                                                                                                                                                                                                                                                                                                                            | Cognitions: <ul style="list-style-type: none"> <li>Knowledge of medications/ conditions – <i>improved</i></li> </ul>                                                                                                                                                                                                        |  |
|                   |    |                                                             |                                   |                                                                                                                                                                                                   |                                                                     |                                                                                                                     |                                                                                                                                                                                                                                                                                                                            | Behaviors: <ul style="list-style-type: none"> <li>Medication adherence, adherence to healthy lifestyle – <i>improved</i></li> </ul>                                                                                                                                                                                         |  |
| Enworom 2015 (66) | QE | CKD 1-4                                                     | 49<br>(E = 25, C = 24)<br>Age: 73 | <ul style="list-style-type: none"> <li>General CKD knowledge</li> <li>Symptoms management</li> <li>Modalities</li> <li>Comorbidities</li> <li>Other (i.e. advanced care planning)</li> </ul>      | Nurse practitioner, physician assistants, clinical nurse specialist | <ul style="list-style-type: none"> <li>Face to face</li> </ul>                                                      | “Kidney Disease Education (KDE)” <ul style="list-style-type: none"> <li>6 education classes on one on one or group basis</li> </ul> <i>Duration:</i> unclear<br><i>Comparator:</i> no KDE                                                                                                                                  | Physiological measures: <ul style="list-style-type: none"> <li>GFR decline – <i>slower in E group</i></li> <li>Hemoglobin – <i>E group maintained more stable level compared to non-KDE group who lost 1g/dL from baseline</i></li> </ul>                                                                                   |  |
|                   |    |                                                             |                                   |                                                                                                                                                                                                   |                                                                     |                                                                                                                     |                                                                                                                                                                                                                                                                                                                            | Cognitions: <ul style="list-style-type: none"> <li>Kidney disease knowledge (KiKS survey) – <i>no change</i></li> </ul>                                                                                                                                                                                                     |  |
| Vann 2015 (29)    | PP | CKD 3b-4                                                    | 9<br>Age: mean NR                 | <ul style="list-style-type: none"> <li>General CKD knowledge</li> <li>Diet/nutrition</li> <li>Symptom management</li> <li>Modalities</li> <li>Comorbidities</li> <li>Other (i.e. self-</li> </ul> | Nurse practitioner                                                  | <ul style="list-style-type: none"> <li>Print</li> <li>Website</li> <li>Face to face</li> <li>White board</li> </ul> | “CKD Education Program” <ul style="list-style-type: none"> <li>CKD education sessions</li> <li>Assessment of readiness to change</li> <li>CKD toolkit individualized for each participant</li> <li>Collaborative goal setting between nurse practitioner and patient</li> <li>Information booklet with websites</li> </ul> | Cognitions: <ul style="list-style-type: none"> <li>CKD related knowledge – <i>improved</i></li> </ul>                                                                                                                                                                                                                       |  |

CKD self-management interventions

|                          |     |                                                                         |                                   |                                                                                                 |                               |                           |                                                                                                                                                                                                                                                                                                                                                               |                                                                                                                                                                                                                                  |  |
|--------------------------|-----|-------------------------------------------------------------------------|-----------------------------------|-------------------------------------------------------------------------------------------------|-------------------------------|---------------------------|---------------------------------------------------------------------------------------------------------------------------------------------------------------------------------------------------------------------------------------------------------------------------------------------------------------------------------------------------------------|----------------------------------------------------------------------------------------------------------------------------------------------------------------------------------------------------------------------------------|--|
|                          |     |                                                                         |                                   | care management strategies and behaviors)                                                       |                               |                           | listed<br>• Patients met with nurse practitioner for 60 min<br><i>Duration:</i> over 6 visits<br><i>Comparator:</i> none                                                                                                                                                                                                                                      | Behaviors:<br>• Self reported behavior change - <i>improved</i>                                                                                                                                                                  |  |
| Cupisiti 2016 (67)       | Obs | CKD 3b-5                                                                | 823 (E = 305, C = 518) Age: 69-74 | • Diet/nutrition                                                                                | Dietician                     | • Face to face            | “Nutritional Treatment”<br>• Renal dietician assessed dietary habits using 3 day dietary recall & performed an intervention tailored to the needs/clinical features of the patient<br>• Progressed from “normal” diet → low protein diet → very low protein diet depending on needs<br><i>Duration:</i> at least 6 months<br><i>Comparator:</i> standard care | Physiological measures:<br>• Phosphaturia – <i>lower in E group</i>                                                                                                                                                              |  |
|                          |     |                                                                         |                                   |                                                                                                 |                               |                           |                                                                                                                                                                                                                                                                                                                                                               | Health care:<br>• Furosemide use – <i>lower in E group</i><br>• Calcium free phosphate bind use – <i>lower in E group</i><br>• ESA use – <i>lower in E group</i><br>• Active vitamin D preparation use – <i>lower in E group</i> |  |
|                          |     |                                                                         |                                   |                                                                                                 |                               |                           |                                                                                                                                                                                                                                                                                                                                                               | Individual outcomes:<br>• Dietary satisfaction questionnaire – <i>majority of E group patients were satisfied with their diet</i>                                                                                                |  |
| Ong 2016 (68)            | PP  | CKD 4-5                                                                 | 45 Age: 59.4                      | • Medications<br>• Symptom management<br>• Comorbidities<br>• Other (i.e. tracking lab results) | Mobile application            | • Smart phone application | “Smartphone based SM system”<br>• Application generated personalized patient messages based on pre-built algorithms<br><i>Duration:</i> 6 months<br><i>Comparator:</i> none                                                                                                                                                                                   | Physiological measures:<br>• BP – <i>change in home BP readings</i>                                                                                                                                                              |  |
|                          |     |                                                                         |                                   |                                                                                                 |                               |                           |                                                                                                                                                                                                                                                                                                                                                               | Intervention specific:<br>• Medications – <i>127 medication discrepancies identified</i>                                                                                                                                         |  |
| Penaloza-Ramos 2016 (25) | Obs | HTN (BP>130/80) + CKD stage 3 or CVA/TIA or DM or MI or angina, or CABG | NR Age: NA                        | • See McManus (48)                                                                              | General practitioner, patient | • See McManus (48)        | • See McManus (48)                                                                                                                                                                                                                                                                                                                                            | Health care:<br>• Cost effective – <i>yes</i>                                                                                                                                                                                    |  |

Abbreviations: BP – blood pressure; E – experimental; C – control; CHD – coronary heart disease; CHEERS – Controlling Hypertension: Education and Empowerment Renal Study; DM – diabetes mellitus; HTN – hypertension; NR – not reported; RRT – renal replacement therapy; TIA – transient ischemic attack; QOL – quality of life; RCT = randomized controlled trial; QE = quasi-experimental; PP = pre-post intervention; Obs = observational; MM = mixed methods; SM – self-management

CKD self-management interventions

1  
2  
3  
4  
5  
6  
7  
8  
9  
10  
11  
12  
13  
14  
15  
16  
17  
18  
19  
20  
21  
22  
23  
24  
25  
26  
27  
28  
29  
30  
31  
32  
33  
34  
35  
36  
37  
38  
39  
40  
41  
42  
43  
44  
45  
46  
47

Key:

-  Not applicable
-  Outcome improved post intervention
-  Outcome worsened post intervention
-  Outcome unchanged post intervention
-  Outcome had mixed results (some improved and/or some worsened and/or some did not change)

For peer review only

### Description of qualitative study outcomes and results

Table 5 summarizes the findings from 6 qualitative studies that explored patient perspectives, one of these being a mixed methods study. All studies used semi-structured interviews and one also used a questionnaire. The aims of all these studies were to examine patient perspectives' regarding the self-management interventions they were involved in. Due to the variety of interventions (e.g. intervention topics, delivery mode and providers of the intervention) it was difficult to summarize findings into meaningful categories. Overall, patients highlighted that interventions needed to be individualized and tailored to their specific situations and preferences (e.g. awareness of having CKD, stage of CKD, knowledge of the disease, access to resources, etc.).

## CKD self-management interventions

Table 5 Summary of qualitative studies

| Study (Reference) | Target population                      | Number of participants | Aim/Intervention                                                                                                                                                                                                                                                    | Methods                                                           | Summary of findings                                                                                                                                                                                                                                                                                                                                                                                                                                                                                                                                                              |
|-------------------|----------------------------------------|------------------------|---------------------------------------------------------------------------------------------------------------------------------------------------------------------------------------------------------------------------------------------------------------------|-------------------------------------------------------------------|----------------------------------------------------------------------------------------------------------------------------------------------------------------------------------------------------------------------------------------------------------------------------------------------------------------------------------------------------------------------------------------------------------------------------------------------------------------------------------------------------------------------------------------------------------------------------------|
| Blickem (21)      | CKD Stage 3                            | 20                     | <p>“To explore the experience of patient-led assessment for network support (PLANS) from the perspectives of participants and telephone support workers.” (p.1)</p> <p>Intervention: see Table 4 Blakeman (47)</p>                                                  | Interviews and focus groups:<br>No analytic methodology discussed | <ul style="list-style-type: none"> <li>• Mixed reception from participants</li> <li>• Formulation of “health” in everyday life (i.e. participants unaware of having CKD or its significance - confused about relevance of PLANS)</li> <li>• Trajectories and tipping points (i.e. engagement in PLANS depended on participants’ stage of life – either could influence trying new things or disrupt routines)</li> <li>• Trust in networks (i.e. unwillingness to seek support, intrusive, others saw improved awareness/access to local resources; tailored support)</li> </ul> |
| Heiden (69)       | CKD pre-dialysis, dialysis, transplant | 5                      | <p>To identify participant’s perspective regarding a “web application prototype to help make decisions regarding diet restrictions and phosphate binder dosage.” (p.544)</p> <p>Intervention: Website tool for patients that included 3 components – diet/fluid</p> | Interviews: no analytic methodology discussed                     | <ul style="list-style-type: none"> <li>• Benefits: <ul style="list-style-type: none"> <li>○ Education tool increased insight and understanding</li> <li>○ Assisted in tracking and choosing best food alternative</li> <li>○ Decision support for binder dosage</li> </ul> </li> <li>• Limitations: <ul style="list-style-type: none"> <li>○ Targeted users familiar with using computers</li> <li>○ Users had different information needs</li> <li>○ One-way communication</li> <li>○ Need self-care resources in place to carry out recommendations</li> </ul> </li> </ul>     |

## CKD self-management interventions

|             |                                      |                               |                                                                                                                                                                                                                                                                                                                                                                                          |                                                                |                                                                                                                                                                                                                                                                                                                                                                                                                                                                                                                                               |
|-------------|--------------------------------------|-------------------------------|------------------------------------------------------------------------------------------------------------------------------------------------------------------------------------------------------------------------------------------------------------------------------------------------------------------------------------------------------------------------------------------|----------------------------------------------------------------|-----------------------------------------------------------------------------------------------------------------------------------------------------------------------------------------------------------------------------------------------------------------------------------------------------------------------------------------------------------------------------------------------------------------------------------------------------------------------------------------------------------------------------------------------|
|             |                                      |                               | education; diet registry; and phosphate binder decision support tool.                                                                                                                                                                                                                                                                                                                    |                                                                |                                                                                                                                                                                                                                                                                                                                                                                                                                                                                                                                               |
| Jansen (70) | CKD Stages 4 – 5                     | 7                             | <p>Feasibility of “a psychosocial intervention to assist ESRD patients and their partners in integrating renal disease and treatment into daily activities, primary work and thereby increasing autonomy.” (p.280)</p> <p>Intervention: Group teaching and handbook regarding coping strategies and goals based on self-regulation, social learning and self-determination theories.</p> | Interviews: no analytic methodology discussed                  | <ul style="list-style-type: none"> <li>• Benefits: <ul style="list-style-type: none"> <li>○ Group included pre-dialysis and dialysis patients</li> <li>○ Leaders addressed individual needs, situations and questions</li> </ul> </li> <li>• Limitations: <ul style="list-style-type: none"> <li>○ Patient preferences for information differed by stages of CKD</li> <li>○ Patient schedules need to be considered when intervention offered</li> <li>○ Consider offering intervention shortly after diagnosis of CKD</li> </ul> </li> </ul> |
| Thomas (33) | Type 1 or 2 DM with microalbuminuria | 5 (3 face-to-face interviews) | To evaluate “whether patients understood the content of the pack and whether they could make any recommendations.”                                                                                                                                                                                                                                                                       | Questionnaire and interview: no analytic methodology discussed | <ul style="list-style-type: none"> <li>• Mixed responses</li> <li>• DVD – content distressing and took effort to use</li> <li>• Written material useful, but need to elaborate on seriousness of disease</li> <li>• Package helped change behavior – stop smoking, monitoring DM</li> </ul>                                                                                                                                                                                                                                                   |

## CKD self-management interventions

|               |                                                             |    |                                                                                                                                                                                                                                                                     |                                                   |                                                                                                                                                                                                                                                                                                                                                                                                                                                                                                                                                                                                                               |
|---------------|-------------------------------------------------------------|----|---------------------------------------------------------------------------------------------------------------------------------------------------------------------------------------------------------------------------------------------------------------------|---------------------------------------------------|-------------------------------------------------------------------------------------------------------------------------------------------------------------------------------------------------------------------------------------------------------------------------------------------------------------------------------------------------------------------------------------------------------------------------------------------------------------------------------------------------------------------------------------------------------------------------------------------------------------------------------|
|               |                                                             |    | (p.275)<br>Intervention: See Table 4 Thomas (30)                                                                                                                                                                                                                    |                                                   |                                                                                                                                                                                                                                                                                                                                                                                                                                                                                                                                                                                                                               |
| Williams (22) | CKD Stages 2 – 4 with diabetes and cardiovascular disease   | 26 | “Examine the perceptions of a group of CALD participants with comorbid diabetes, chronic kidney disease and cardiovascular disease ... using an intervention to influence their medication self-efficacy.” (p. 1271)<br><br>Intervention: see Table 4 Williams (44) | Interviews: Ritchie and Spencer thematic approach | <ul style="list-style-type: none"> <li>• Attitudes towards taking medications (i.e. appreciate importance of taking; medication burden; concern with the number of medications, effectiveness and side effects of medications)</li> <li>• Having to take medications (i.e. behaviors and family support to assist taking medications; forgetting and non-adherent; motivation to take to prevent becoming worse)</li> <li>• Impediments to chronic illness medication self-efficacy (i.e. lack of knowledge regarding medication; strong faith in physician’s advice; multiple medications too overwhelming; cost)</li> </ul> |
| Williams (23) | CKD Stages 2 – 4, with coexisting diabetes and hypertension | 39 | Individual perceptions of a “telephone call using a motivational interviewing approach to improve medication adherence in participants with co-existing diabetes, CKD and hypertension.”                                                                            | Interviews: Ritchie and Spencer thematic approach | <ul style="list-style-type: none"> <li>• Importance of health (i.e. determined the degree of health behavior; altered medications or use of alternative medicine to control health)</li> <li>• Perceived seriousness of disease (i.e. thinking about mortality; comorbidities complicate care; acute illness with chronic conditions)</li> <li>• Perceived threat of disease (i.e. want to learn about disease control earlier; symptom management; looking for reasons to explain why ill)</li> </ul>                                                                                                                        |

1  
2  
3  
4  
5  
6  
7  
8  
9  
10  
11  
12  
13  
14  
15  
16  
17  
18  
19  
20  
21  
22  
23  
24  
25  
26  
27  
28  
29  
30  
31  
32  
33  
34  
35  
36  
37  
38  
39  
40  
41  
42  
43  
44  
45  
46  
47

|  |  |  |                                                          |  |  |
|--|--|--|----------------------------------------------------------|--|--|
|  |  |  | (p.472)<br>Intervention: see<br>Table 4 Williams<br>(43) |  |  |
|--|--|--|----------------------------------------------------------|--|--|

For peer review only



## DISCUSSION

To our knowledge, this is the first scoping review involving patients as research partners to identify and summarize self-management interventions for adults with CKD. The scoping review methodology enabled us to systematically summarize a broad range of self-management interventions, and describe their features. We identified 50 studies that investigated self-management interventions for adults with CKD, with considerable variation in interventions, outcomes assessed and results obtained (i.e. some improved and/or some worsened and/or some did not change). We found that self-management interventions for CKD is an emerging area with most studies published within the last 5 years, and may be related to the growing recognition of the importance of incorporating patients and their families in managing their disease to improve outcomes (7).

Our findings are similar to prior reviews reporting that the design of self-management interventions for CKD have not been theoretically driven and have been predominately designed by healthcare professionals without input from patients (13, 14). Person-centered care is changing how healthcare professionals deliver care to patients, but more importantly how patients and their families are actively involved in self-managing their chronic conditions (71). Engaging patients by having them co-design self-management interventions will ensure that patient preferences based on their values, culture, and psychosocial needs will be addressed in the self-management intervention (12-14). Through our current national partnership with patients, researchers and clinicians we have the opportunity to obtain patient perspectives, along with incorporating a behavior change theory to inform the future design of a self-management intervention for CKD.

## CKD self-management interventions

1  
2  
3 Only 28% of studies that we identified included patients with CKD plus other comorbidities,  
4 despite the common presence of comorbidities in this patient population. Less than one-quarter  
5 of included studies provided information on how to manage comorbid conditions such as  
6 tracking lab results and symptom management. This highlights the need to consider “whole  
7 person care”, where the self-management intervention needs to encompass the physical, mental  
8 and emotional needs of the patient (72, 73) that are important to them, as well as meeting the  
9 individuals desires by collaboration between relevant providers (71).

10  
11  
12  
13  
14  
15  
16  
17  
18  
19  
20 Forty-five different self-management interventions were identified, with one or more topics  
21 presented in a variety of formats and by a variety of providers. Symptom management and  
22 lifestyle topics were not included in many of the interventions. Based on prior work (3), non-  
23 dialysis patients with CKD have indicated that these were important topics for them in managing  
24 their CKD with an aim to slow the progression of CKD, and will be important to consider in the  
25 development of future interventions. Face to face was the most common delivery format while  
26 electronic (internet or mobile application) was least common, with many studies reporting  
27 multiple formats (i.e. face to face and printed materials). With the expansion of electronic  
28 platforms for supporting patients and providers in the uptake of evidence-based care, there is the  
29 potential to use an electronic format to support patients in self-managing their CKD and other  
30 co-morbidities (74). It is worth noting that there was variability in duration and frequency of face  
31 to face encounters, from a single session to multiple sessions over weeks to months. While  
32 varied options for in-person delivery is good if it meets the needs of the patients and their  
33 families, it may not be feasible on a larger scale due to the resources required. Only 5 studies  
34 looked at self-management health care cost-effectiveness, health care utilization and access, each  
35 measuring different end-points with mixed results. Future self-management interventions should

## CKD self-management interventions

1  
2  
3 include the essential principles to self-management (e.g. accessing relevant health information,  
4  
5 adhering to multiple treatment protocols, changing health behaviors, shared decision making  
6  
7 with healthcare providers) (7, 75), along with evaluation of the cost-effectiveness and resource  
8  
9 utilization.

10  
11  
12  
13 The majority of studies did not identify a single primary outcome but rather multiple outcomes.  
14  
15 We found that physiological outcomes (i.e. blood pressure) were the most commonly reported  
16  
17 and symptoms were the least mentioned. These findings demonstrate the lack of patient driven  
18  
19 outcomes that may be important to them. For example, a patient's individual health goals across  
20  
21 a variety of dimensions (i.e. symptoms, mobility, social and role function in the family or  
22  
23 community) that could possibly maximize their quality of life. Work by Tong et al. (2015)  
24  
25 highlights this concept, where patients with CKD are more interested in treatment choices that  
26  
27 influence non-traditional clinical outcomes such as impact on family and lifestyle (72). A holistic  
28  
29 approach should be considered where mental and psychosocial outcomes are investigated, rather  
30  
31 than just physiological endpoints.  
32  
33  
34

35  
36  
37 Our findings from the qualitative studies looking at patient perspectives are inconclusive because  
38  
39 of the limited number of studies and the heterogeneity of the interventions. Havas et al. (2016)  
40  
41 similarly reported a lack of research related to patient perspectives on self-management in CKD  
42  
43 (12). There is also a lack of qualitative studies overall, which could provide valuable information  
44  
45 regarding attitudes and challenges of self-management interventions from the perspective of both  
46  
47 providers and patients.  
48  
49

50  
51 Strengths of our study include the comprehensive nature of our search, inclusion of all study  
52  
53 designs and consideration of self-management features that have not been investigated  
54  
55 previously. We also engaged patient partners in determining the research question, advising us  
56  
57

1  
2  
3 on search terms, grey literature sources and reviewing the results to ensure we captured and  
4 reported the data meaningfully. One of the main limitations was the challenge in synthesizing the  
5 data given its heterogeneous nature. To address this challenge the two reviewers used two  
6 standardized tools TIDieR (19) and the EPOC tool (20) to independently extract data, and  
7 independently coded the outcomes into categories using the Self-and Family Management  
8 Framework (6). Also, we were unable to assess the self-management outcomes in terms of  
9 sustained changes in behavior, physiological, and health status. A final limitation was our  
10 inability to draw conclusions regarding the most effective self-management intervention for adult  
11 patients with CKD, keeping in mind our aim was to review the breadth of the current literature  
12 and present the gaps that exist.  
13  
14  
15  
16  
17  
18  
19  
20  
21  
22  
23  
24  
25

26  
27 Overall, we found considerable variation in self-management interventions for adults with CKD  
28 with respect to their content and delivery, as well as the outcomes assessed and results obtained.  
29 Major gaps in the literature include the lack of patient engagement in the design of the self-  
30 management intervention, along with the lack of a behavioral change theory to inform their  
31 design. Our future research will incorporate intervention frameworks to co-develop and evaluate  
32 a self-management intervention based on a sound behavioral theory involving our national  
33 patient partners, specialists, primary care providers, and decision makers.  
34  
35  
36  
37  
38  
39  
40  
41  
42

#### 43 **ACKNOWLEDGEMENTS**

44  
45  
46 Diane Lorenzetti for providing support and direction regarding search strategies. We would also  
47 like to thank Sarah Gil in assisting us with acquiring full text studies.  
48  
49  
50  
51  
52  
53  
54  
55  
56  
57  
58  
59  
60

## CONFLICT OF INTEREST STATEMENT

All authors certify that our manuscript has not been published in whole or in part elsewhere, nor is it currently being considered for publication elsewhere. All authors declare that they have no relevant conflicts of interest.

## AUTHORS' CONTRIBUTIONS

Research idea and study design: all authors; data acquisition: MD, BK; data analysis/interpretation: MD, BK, BRH; supervision or mentorship: BRH, PR. Each author contributed important intellectual content during manuscript drafting and revisions and accepts accountability for the overall work by ensuring that questions to the accuracy or integrity of any portion of the work are appropriately investigated and resolved.

## FUNDING

Ms. Maoliosa Donald is supported by Alberta SPOR Graduate Studentship in Patient-Oriented Research. Dr. Brenda Hemmelgarn is supported by the Roy and Vi Baay Chair in Kidney Research, Canadian Institutes of Health Research's Strategy for Patient-Oriented Research (SPOR). The funding organizations had no role in the design and conduct of the study; data collection, analysis and interpretation; or preparation, review or approval of the manuscript.

**DATA SHARING STATEMENT**

The following data will be available, study protocol and analysis plan to anyone who wishes to access the data and will be available immediately following publication from the corresponding author.

**TABLES**

Table 1 Characteristics of studies

Table 2 Overall characteristics of self-management interventions

Table 3 Summary of quantitative outcomes

Table 4 summary of quantitative studies

Table 5 Summary of qualitative studies

**FIGURES**

Figure 1 Prisma flow diagram

**SUPPLEMENTARY MATERIAL**

Table S1. Search strategies used to search traditional databases

Table S2. Search strategies used to search Canadian Agency for Drugs and Technology (CADTH) databases

**REFERENCES**

1. Arora P, Vasa P, Brenner D, et al. Prevalence estimates of chronic kidney disease in Canada: Results of a nationally representative survey. *CMAJ*.185(9):E417-23, 2013
2. Tonelli M, Wiebe N, Guthrie B, et al. Comorbidity as a driver of adverse outcomes in people with chronic kidney disease. *Kidney Int*.88(4):859-66, 2015
3. Hemmelgarn BR, Pannu N, Ahmed SB, et al. Determining the research priorities for patients with chronic kidney disease not on dialysis. *Nephrology, dialysis, transplantation*.32(5):847-54, 2017
4. Tong A, Chando S, Crowe S, et al. A systematic review. *American Journal of Kidney Diseases*.65(5):674-83, 2015
5. Richard AA, Shea K. Delineation of self-care and associated concepts. *J Nurs Scholarsh*.43(3):255-64, 2011
6. Grey M, Schulman-Green D, Knafk K, Reynolds NR. A revised Self- and Family Management Framework. *Nurs Outlook*.63(2):162-70, 2015
7. Novak M, Costantini L, Schneider S, Beanlands H. Approaches to self-management in chronic illness. *Semin Dial*.26(2):188-94, 2013
8. Lopez-Vargas PA, Tong A, Howell M, Craig JC. Educational interventions for patients with CKD: A systematic review. *American Journal of Kidney Diseases*.68(3):353-70, 2016
9. Mason, J., Khunti, K., Stone, M., Farooqi, A., & Carr, S. (2008). Educational interventions in kidney disease care: a systematic review of randomized trials. *American Journal of Kidney Diseases*. 51(6), 933-951
10. Lee, M., Wu, S., Hsieh, N., & Tsai, J. (2016). Self-management programs on eGFR, depression, and quality of life among patients with chronic kidney disease: A meta-analysis. *Asian Nursing Research*. 10(4), 255-262. doi:<https://doi.org/10.1016/j.anr.2016.04.002>
11. Lin, M.-Y., Liu, M. F., Hsua, L.-F., & Tsai, P.-S. (2017). Effects of self-management on chronic kidney disease: A meta-analysis. *International Journal of Nursing Studies*. doi:10.1016/j.ijnurstu.2017.06.008
12. Havas K, Bonner A, Douglas C. Self-management support for people with chronic kidney disease: Patient perspectives. *Journal of Renal Care*.42(1):7-14, 2016

13. Bonner A, Havas K, Douglas C, Thepha T, Bennett P, Clark R. Self-management programmes in stages 1-4 chronic kidney disease: A literature review. *Journal of Renal Care*.40(3):194-204, 2014
14. Welch JL, Johnson M, Zimmerman L, Russell CL, Perkins SM, Decker BS. Self-management interventions in stages 1 to 4 chronic kidney disease: An integrative review. *West J Nurs Res*.37(5):652-78, 2015
15. Levac D, Colquhoun H, O'Brien KK. Scoping studies: Advancing the methodology. *Implementation Science*.IS.5:69, 2010
16. Levin A. Canadians Seeking Solutions and Innovations to Overcome Chronic Kidney Disease (Can-SOLVE CKD). *CIHR Grant*. 2015
17. Peters MD, Godfrey CM, Khalil H, McInerney P, Parker D, Soares CB. Guidance for conducting systematic scoping reviews. *Int J Evid-based Healthc*.13(3):141-6, 2015
18. Canadian Agency for Drugs and Technologies in Health (CADTH). Grey Matters: A practical search tool for evidence-based medicine. <https://www.cadth.ca/resources/finding-evidence/grey-matters>, Accessed September 2015
19. Template for intervention description and replication (TIDieR) checklist. <http://www.equator-network.org/wp-content/uploads/2014/03/TIDieR-Checklist-PDF>, Accessed September 2016
20. Effective Practice and Organisation of Care (EPOC) data collection. <http://epoc.cochrane.org/epoc-specific-resources-review-authors>, Accessed October 2016
21. Blickem C, Kennedy A, Jariwala P. et al. Aligning everyday life priorities with people's self-management support networks: An exploration of the work and implementation of a needs-led telephone support system. *BMC Health Services Research*.14:262, 2014
22. Williams A, Manias E, Cross W, Crawford K. Motivational interviewing to explore culturally and linguistically diverse people's comorbidity medication self-efficacy. *Journal of Clinical Nursing*.24(9-10):1269-79, 2015
23. Williams A, Manias E. Exploring motivation and confidence in taking prescribed medicines in coexisting diseases: A qualitative study. *Journal of Clinical Nursing*.23(3-4):471-81, 2014
24. Walker RC, Marshall MR, Polaschek NR. A prospective clinical trial of specialist renal nursing in the primary care setting to prevent progression of chronic kidney: A quality improvement report. *BMC Family Practice*.15:155, 2014
25. Penaloza-Ramos MC, Jowett S, Mant J, Schwartz C. et al. Cost-effectiveness of self-management of blood pressure in hypertensive patients over 70 years with suboptimal control



## CKD self-management interventions

- and established cardiovascular disease or additional cardiovascular risk diseases (TASMIN-SR). *European Journal of Preventive Cardiology*.23(9):902-12, 2016
26. Bryne J, Khunti K, Stone M, Farooqi A, Carr S. Feasibility of a structured group education session to improve self-management of blood pressure in people with chronic kidney disease: An open randomised pilot trial. *BMJ Open*. 2011
27. Kao Y, Huang Y, Chen P, Wang K. The effects of exercise education intervention on the exercise behaviour, depression, and fatigue status of chronic kidney disease patients. *Health Education*.112(6):472-84, 2012
28. Murali S, Arab L, Vargas R, Rastogi A, Ang A, Shetty N. Internet-based tools to assess diet and provide feedback in chronic kidney disease stage IV: A pilot study. *Journal of Renal Nutrition*.23(2):e33-42, 2013
29. Vann JC, Hawley J, Wegner S, Falk RJ, Harward DH, Kshirsagar AV. Nursing intervention aimed at improving self-management for persons with chronic kidney disease in North Carolina Medicaid: A pilot project. *Nephrology Nursing Journal*.42(3):239-55, 2015
30. Montoya V, Sole ML, Norris AE. Improving the care of patients with chronic kidney disease using group visits: A pilot study to reflect an emphasis on the patients rather than the Disease. *Nephrology Nursing Journal*.43(3):207-22, 2016
31. Kazawa K, Moriyama M. Effects of a self-management skills-acquisition program on pre-dialysis patients with diabetic nephropathy. *Nephrology Nursing Journal*.40(2):141-8, 2013
32. Nauta J, van der Boog J, Slegten J, Janssen R, Hettinga M. Web-based lifestyle management for chronic kidney disease. *eTELEMED 2013, The Fifth International Conference on eHealth, Telemedicine, and Social Medicine*; Nice, France: 141-146, 2013
33. Thomas N, Bryar R. An evaluation of a self-management package for people with diabetes at risk of chronic kidney disease. *Primary health care research & development*.14(3):270-80, 2013
34. Binik YM, Devins GM, Barre PE. et al. Live and learn: Patient education delays the need to initiate renal replacement therapy in end-stage renal disease. *The Journal of Nervous and Mental Disease*.181(6):371-6, 1993
35. Gillis BP, Caggiula AW, Chiavacci AT. et al. Nutrition intervention program of the modification of diet in renal disease study: A self-management approach. *Journal of the American Dietetic Association*.95(11):1288-94, 1995
36. Devins GM, Barré, PE, Binik YM. Predialysis psychoeducational intervention and coping styles influence time to dialysis in chronic kidney disease. *American Journal of Kidney Diseases*.42(4):693-703, 2003

- 1
  - 2
  - 3
  - 4
  - 5
  - 6
  - 7
  - 8
  - 9
  - 10
  - 11
  - 12
  - 13
  - 14
  - 15
  - 16
  - 17
  - 18
  - 19
  - 20
  - 21
  - 22
  - 23
  - 24
  - 25
  - 26
  - 27
  - 28
  - 29
  - 30
  - 31
  - 32
  - 33
  - 34
  - 35
  - 36
  - 37
  - 38
  - 39
  - 40
  - 41
  - 42
  - 43
  - 44
  - 45
  - 46
  - 47
  - 48
  - 49
  - 50
  - 51
  - 52
  - 53
  - 54
  - 55
  - 56
  - 57
  - 58
  - 59
  - 60
37. Devins GM, Mendelssohn DC, Barre PE, Taub K, Binik YM. Predialysis psychoeducational intervention extends survival in CKD: A 20-year follow-up. *American Journal of Kidney Diseases*.46(6):1088-98, 2005
38. Campbell KL, Ash S, Bauer JD. The impact of nutrition intervention on quality of life in pre-dialysis chronic kidney disease patients. *Clin Nutr*.27(4):537-44, 2008
39. Chen SH, Tsai YF, Sun CY, Wu IW, Lee CC, Wu MS. The impact of self-management support on the progression of chronic kidney disease--a prospective randomized controlled trial. *Nephrology, Dialysis, Transplantation*.26(11):3560-6, 2011
40. Flesher M, Woo P, Chiu A, Charlebois A, Warburton DE, Leslie B. Self-management and biomedical outcomes of a cooking, and exercise program for patients with chronic kidney disease. *Journal of Renal Nutrition*.21(2):188-95, 2011
41. Joboshi H, Oka M, Takahashi S. et al. Effects of the EASE program in chronic kidney disease education: A randomized controlled trial to evaluate self-management. *J Jpn Acad Nurs Sci*.32(1):21-9, 2012
42. Williams A, Manias E, Walker R, Gorelik A. A multifactorial intervention to improve blood pressure control in co-existing diabetes and kidney disease: A feasibility randomized controlled trial. *Journal of Advanced Nursing*.68(11):2515-25, 2012
43. Williams AM, Liew D, Gock H, Gorelik A. Working with CALD groups: Testing the feasibility of an intervention to improve medication self- management in people with kidney disease, diabetes, and cardiovascular disease. *Renal Society of Australasia Journal*.8(2):62-9, 2012
44. de Brito-Ashurst I, Perry L, Sanders TA. et al. The role of salt intake and salt sensitivity in the management of hypertension in South Asian people with chronic kidney disease: A randomised controlled trial. *Heart*.99(17):1256-60, 2013
45. Paes-Barreto JG, Silva MI, Qureshi AR. et al. Can renal nutrition education improve adherence to a low-protein diet in patients with stages 3 to 5 chronic kidney disease? *Journal of Renal Nutrition*.23(3):164-71, 2013
46. Blakeman T, Blickem C, Kennedy A. et al. Effect of information and telephone-guided access to community support for people with chronic kidney disease: Randomised controlled trial. *PloS one*.9(10):e109135, 2014
47. McManus R, Mant J, Haque MS. et al. Effect of self-monitoring and medication self-titration on systolic blood pressure in hypertensive patients at high risk of cardiovascular disease: The TASMINSR randomized clinical trial. *JAMA*.312(8):799, 2014
48. Park J, Lyles RH, Bauer-Wu S. Mindfulness meditation lowers muscle sympathetic nerve activity and blood pressure in African-American males with chronic kidney disease.

## CKD self-management interventions

- 1  
2  
3  
4  
5  
6  
7  
8  
9  
10  
11  
12  
13  
14  
15  
16  
17  
18  
19  
20  
21  
22  
23  
24  
25  
26  
27  
28  
29  
30  
31  
32  
33  
34  
35  
36  
37  
38  
39  
40  
41  
42  
43  
44  
45  
46  
47  
48  
49  
50  
51  
52  
53  
54  
55  
56  
57  
58  
59  
60
- American Journal of Physiology Regulatory, Integrative and Comparative Physiology*.307(1):R93-R101, 2014
49. Howden EJC, Strand H, Douglas B, Campbell K, Isbel N. Exercise training in CKD: Efficacy, adherence, and safety. *American Journal of Kidney Diseases*.65(4):583-91, 2015
50. Leehey DJ, Collins E, Kramer HJ. et al. Structured exercise in obese diabetic patients with chronic kidney disease: A randomized controlled trial. *American Journal of Nephrology*.44(1):54-62, 2016
51. Robinson JA, Robinson KJ, Lewis DJ. Games: A motivational educational strategy. *ANNA Journal*.15(5):277-9, 1988
52. Klang B, Bjorvell H, Berglund J, Sundstedt C, Clyne N. Predialysis patient education: Effects on functioning and well-being in uraemic patients. *Journal of Advanced Nursing*.28(1):36-44, 1998
53. Cupisti A, Morelli E, Meola M, Barsotti M, Barsotti G. Vegetarian diet alternated with conventional low-protein diet for patients with chronic renal failure. *Journal of Renal Nutrition*.12(1):32-7, 2002
54. Gutierrez Vilaplana JM, Zampieron A, Craver L, Buja A. Evaluation of psychological outcomes following the intervention 'teaching group': Study on predialysis patients. *Journal of Renal Care*.35(3):159-64, 2009
55. Pagels A, Wang M, Magnusson A, Eriksson A, Melander S. Using patient diary in chronic illness care: Evaluation of a tool promoting self-care. *Vard I Norden*.28(3):49-52, 2008
56. Yen M, Huang JJ, Teng HL. Education for patients with chronic kidney disease in Taiwan: A prospective repeated measures study. *Journal of Clinical Nursing*.17(21):2927-34, 2008
57. Gutierrez Vilaplana JM, Pinol ES, Ponsa JC, Moncasi P. Evaluacion de la intervencion ensenanza: grupo en la consulta de enfermedad renal cronica avanzada. *Rev Soc Esp Enferm Nefrol*.10(4):280-5, 2007
58. Wu IW, Wang SY, Hsu KH. et al. Multidisciplinary predialysis education decreases the incidence of dialysis and reduces mortality--a controlled cohort study based on the NKF/DOQI guidelines. *Nephrology Dialysis Transplantation*.24(11):3426-33, 2009
59. Wierdsma J, van Zuilen A, van der Bijl J. Self-efficacy and long-term medication use in patients with chronic kidney disease. *Journal of Renal Care*.37(3):158-66, 2011
60. Aguilera Florez AI, Velasco MP, Romero LG. et al. A little-used strategy in caring for patients with chronic kidney disease: Multidisciplinary education of patients and their relatives. *Enferm Nefrol*.15(1):14-21, 2012

61. Choi ES, Lee J. Effects of a face-to-face self-management program on knowledge, self-care practice and kidney function in patients with chronic kidney disease before the renal replacement therapy. *Journal of Korean Academy of Nursing*.42(7):1070-8, 2012
62. Diamantidis CJ, Fink W, Yang S, Zuckerman MR. et al. Directed use of the internet for health information by patients with chronic kidney disease: prospective cohort study. *J Med Internet Res*.15(11):e251, 2013
63. Lin CC, Tsai FM, Lin HS, Hwang SJ, Chen HC. Effects of a self-management program on patients with early-stage chronic kidney disease: A pilot study. *Appl Nurs Res*.26(3):151-6, 2013
64. Walker R, Marshall MR, Polaschek NR. Improving self-management in chronic kidney disease: A pilot study. *Renal Society of Australasia Journal*.9(3):116-25, 2013
65. Wright Nunes J, Greene JH, Wallston K, Eden S, Shintani A, Elasy T, Rothman R, Ikizler T, Cavanaugh KL: Pilot study of a physician-delivered education tool to increase patient knowledge about CKD. *American Journal of Kidney Diseases*.62(1):23-32, 2013
66. Enworom CD, Tabi M. Evaluation of kidney disease education on clinical outcomes and knowledge of self-management behaviors of patients with chronic kidney disease. *Nephrology Nursing Journal*.42(4):363-72, 2015
67. Cupisti A, D'Alessandro C, Di Iorio B. et al. Nutritional support in the tertiary care of patients affected by chronic renal insufficiency: Report of a step-wise, personalized, pragmatic approach. *BMC Nephrology*.17(1):124, 2016
68. Ong SW, Jassal SV, Miller JA. et al. Integrating a Smartphone-Based Self-Management System into Usual Care of Advanced CKD. *CJASN*.11(6):1054-62, 2016
69. Heiden S, Buus AA, Jensen MH, Hejlesen OK. A diet management information and communication system to help chronic kidney patients cope with diet restrictions. *Stud Health Technol Inform*.192:543-7, 2013
70. Jansen DL, Heijmans M, Rijken M, Kaptein AA. The development of and first experiences with a behavioural self-regulation intervention for end-stage renal disease patients and their partners. *Journal of Health Psychology*.16(2):274-83, 2011
71. Brummel-Smith, K., Butler, D., Frieder, M., Gibbs, N., Henry, M., Koons, E., . . . The American Geriatrics Society Expert Panel on Person-Centered, C. (2016). Person-centered care: A definition and essential elements. *Journal of the American Geriatrics Society*. 64(1), 15-18. doi:10.1111/jgs.13866
72. Tong A, Sainsbury P, Chadban S. et al. Patients' experiences and perspectives of living with CKD. *American Journal of Kidney Diseases*.53(4):689-700, 2009

## CKD self-management interventions

- 1  
2  
3 73. Hutchinson TA, Hutchinson N, Arnaert A. Whole person care: Encompassing the two faces  
4 of medicine. *CMAJ*.180(8):845-6, 2009  
5  
6  
7 74. Trisolini M, Roussel A, Zerhusen E. et al. Activating chronic kidney disease patients and  
8 family members through the Internet to promote integration of care. *Int J Integr Care*.4:e17,  
9 2004  
10  
11 75. Ong SW, Jassal SV, Porter E, Logan AG, Miller JA. Using an electronic self-management  
12 tool to support patients with Chronic Kidney Disease (CKD): A CKD clinic self-care model.  
13 *Semin Dial*.26(2):195-202, 2013  
14  
15  
16  
17  
18  
19  
20  
21  
22  
23  
24  
25  
26  
27  
28  
29  
30  
31  
32  
33  
34  
35  
36  
37  
38  
39  
40  
41  
42  
43  
44  
45  
46  
47  
48  
49  
50  
51  
52  
53  
54  
55  
56  
57  
58  
59  
60

For peer review only

1  
2  
3  
4  
5  
6  
7  
8  
9  
10  
11  
12  
13  
14  
15  
16  
17  
18  
19  
20  
21  
22  
23  
24  
25  
26  
27  
28  
29  
30  
31  
32  
33  
34  
35  
36  
37  
38  
39  
40  
41  
42  
43  
44  
45  
46  
47  
48  
49  
50  
51  
52  
53  
54  
55  
56  
57  
58  
59  
60

Figure 1. PRISMA Flow Diagram

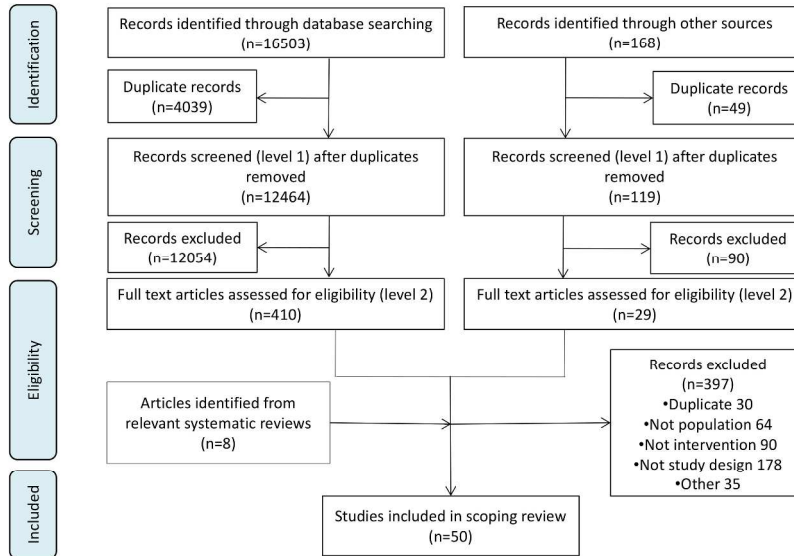

270x203mm (300 x 300 DPI)

View only

# BMJ Open

## Self-management interventions for adults with chronic kidney disease: A scoping review

|                                 |                                                                                                                                                                                                                                                                                                                                                                                                                                                                                                                                                                                                                                                                                                                                                                                                                                                                                                                                                                                                                                                                                                                                                  |
|---------------------------------|--------------------------------------------------------------------------------------------------------------------------------------------------------------------------------------------------------------------------------------------------------------------------------------------------------------------------------------------------------------------------------------------------------------------------------------------------------------------------------------------------------------------------------------------------------------------------------------------------------------------------------------------------------------------------------------------------------------------------------------------------------------------------------------------------------------------------------------------------------------------------------------------------------------------------------------------------------------------------------------------------------------------------------------------------------------------------------------------------------------------------------------------------|
| Journal:                        | <i>BMJ Open</i>                                                                                                                                                                                                                                                                                                                                                                                                                                                                                                                                                                                                                                                                                                                                                                                                                                                                                                                                                                                                                                                                                                                                  |
| Manuscript ID                   | bmjopen-2017-019814.R2                                                                                                                                                                                                                                                                                                                                                                                                                                                                                                                                                                                                                                                                                                                                                                                                                                                                                                                                                                                                                                                                                                                           |
| Article Type:                   | Research                                                                                                                                                                                                                                                                                                                                                                                                                                                                                                                                                                                                                                                                                                                                                                                                                                                                                                                                                                                                                                                                                                                                         |
| Date Submitted by the Author:   | 22-Jan-2018                                                                                                                                                                                                                                                                                                                                                                                                                                                                                                                                                                                                                                                                                                                                                                                                                                                                                                                                                                                                                                                                                                                                      |
| Complete List of Authors:       | Donald, Maoliosa; University of Calgary Cumming School of Medicine, Kaur Kahlon, Bhavneet; University of Calgary Cumming School of Medicine, Medicine<br>Beanlands, Heather ; Ryerson University, Daphne Cockwell School of Nursing<br>Straus, Sharon; St. Michael's Hospital, Li Ka Shing Knowledge Institute<br>Ronksley, Paul; University of Calgary, Community Health Sciences<br>Herrington, Gwen ; Can-SOLVE CKD Network<br>Tong, Allison; The University of Sydney, Sydney School of Public Health<br>Grill, Allan ; University of Toronto, Family & Community Medicine<br>Waldvogel, Blair; Can-SOVLVE CKD Network<br>Large, Chantel; Can-SOLVE CKD Network<br>Large, Claire; Can-SOLVE CKD Network<br>Harwood, L; Lawson Health Research Institute<br>Novak, Marta; University of Toronto, Psychiatry<br>James, Matthew; University of Calgary, Department of Medicine<br>Elliott, Meghan; University of Calgary, Medicine<br>Fernandez, Nicolas ; Can-SOLVE CKD Network<br>Brimble, K. S.; McMaster University Department of Medicine<br>Samual, Susan; University of Calgary, Pediatrics<br>Hemmelgarn, Brenda; University of Calgary |
| <b>Primary Subject Heading</b>: | Renal medicine                                                                                                                                                                                                                                                                                                                                                                                                                                                                                                                                                                                                                                                                                                                                                                                                                                                                                                                                                                                                                                                                                                                                   |
| Secondary Subject Heading:      | Health services research, Patient-centred medicine                                                                                                                                                                                                                                                                                                                                                                                                                                                                                                                                                                                                                                                                                                                                                                                                                                                                                                                                                                                                                                                                                               |
| Keywords:                       | Chronic kidney disease, scoping review, patient-centred care                                                                                                                                                                                                                                                                                                                                                                                                                                                                                                                                                                                                                                                                                                                                                                                                                                                                                                                                                                                                                                                                                     |
|                                 |                                                                                                                                                                                                                                                                                                                                                                                                                                                                                                                                                                                                                                                                                                                                                                                                                                                                                                                                                                                                                                                                                                                                                  |

SCHOLARONE™  
Manuscripts

## Self-management interventions for adults with chronic kidney disease: A scoping review

**Authorship:** Maoliosa Donald MSc<sup>1,2,3</sup>, Bhavneet Kaur Kahlon MD<sup>3</sup>, Heather Beanlands PhD<sup>4</sup>, Sharon Straus MSc, MD<sup>5,6</sup>, Paul Ronksley PhD<sup>2,3</sup>, Gwen Herrington<sup>7</sup>, Allison Tong PhD<sup>8</sup>, Allan Grill MD<sup>9</sup>, Blair Waldvogel<sup>7</sup>, Chantel A. Large<sup>7</sup>, Claire L. Large<sup>7</sup>, Lori Harwood PhD<sup>10</sup>, Marta Novak PhD, MD<sup>11</sup>, Matthew T. James PhD, MD<sup>1,2,3</sup>, Meghan Elliott MD<sup>6</sup>, Nicolas Fernandez PhD<sup>7</sup>, Scott Brimble MSc, MD<sup>12</sup>, Susan Samuel MSc, MD<sup>13</sup>, Brenda R. Hemmelgarn PhD, MD<sup>1,2,3</sup>

### Affiliations:

<sup>1</sup> Department of Medicine, University of Calgary, Calgary, Alberta, Canada

<sup>2</sup> Interdisciplinary Chronic Disease Collaboration, Calgary, Alberta, Canada

<sup>3</sup> Department of Community Health Sciences, University of Calgary, Calgary, Alberta, Canada

<sup>4</sup> Daphne Cockwell School of Nursing, Ryerson University, Toronto, Ontario, Canada

<sup>5</sup> Institute of Health Policy, Management and Evaluation, University of Toronto, Toronto, Ontario, Canada

<sup>6</sup> Li Ka Shing Knowledge Institute, St. Michael's Hospital, Toronto, Ontario, Canada

<sup>7</sup> Can-SOLVE CKD Network, Patient Partner

<sup>8</sup> Sydney School of Public Health, The University of Sydney, Sydney, New South Wales, Australia

<sup>9</sup> Department of Family & Community Medicine, University of Toronto, Ontario, Canada

<sup>10</sup> Lawson Health Research Institute, London, Ontario, Canada

<sup>11</sup> Centre for Mental Health, University Health Network and Department of Psychiatry, University of Toronto, Toronto, Ontario, Canada

<sup>12</sup> Department of Medicine, McMaster University, Hamilton, Ontario, Canada

<sup>13</sup> Department of Pediatrics, University of Calgary, Calgary, Alberta, Canada

### Corresponding author's address:

Dr. Brenda R Hemmelgarn, MD, PhD, FRCPC

Cumming School of Medicine, University of Calgary

TRW Building, 3rd Floor

3280 Hospital Drive NW

Calgary, AB Canada T2N 4Z6

Phone: 403-210-7065

Fax: (403) 210-9286

Email: [Brenda.Hemmelgarn@albertahealthservices.ca](mailto:Brenda.Hemmelgarn@albertahealthservices.ca)



## CKD self-management interventions

**ABSTRACT**

**Objective:** To systematically identify and describe self-management interventions for adult patients with CKD.

**Setting:** Community-based

**Participants:** Adults with CKD Stages 1 – 5 (not requiring kidney replacement therapy).

**Interventions:** Self-management strategies for adults with CKD.

**Primary and secondary outcome measures:** Using a scoping review, electronic databases and grey literature were searched in October 2016 to identify self-management interventions for adults with CKD Stages 1 – 5 (not requiring kidney replacement therapy). Randomized controlled trials (RCTs), non-RCTs, qualitative and mixed method studies were included and study selection and data extraction were independently performed by two reviewers. Outcomes included behaviors, cognitions, physiological measures, symptoms, health status and health care.

**Results:** Fifty studies (19 RCTs, seven quasi-experimental, five observational, 13 pre-post intervention, one mixed methods and five qualitative) reporting 45 interventions were included. The most common intervention topic was diet/nutrition and interventions were regularly delivered face to face. Interventions were administered by a variety of providers, with nursing professionals the most common health professional group. Cognitions (i.e. changes in general CKD knowledge, perceived self-management, and motivation) was the most frequently reported outcome domain that showed improvement. Less than 1% of the interventions were co-developed with patients and 20% were based on a theory or framework.

1  
2  
3 **Conclusions:** There was a wide range of self-management interventions with considerable  
4  
5  
6  
7  
8  
9  
10  
11  
12  
13  
14  
15  
16  
17  
18  
19  
20  
21  
22  
23  
24  
25  
26  
27  
28  
29  
30  
31  
32  
33  
34  
35  
36  
37  
38  
39  
40  
41  
42  
43  
44  
45  
46  
47  
48  
49  
50  
51  
52  
53  
54  
55  
56  
57  
58  
59  
60  
variability in outcomes for adults with CKD. Major gaps in the literature include lack of patient engagement in the design of the interventions, with the majority of interventions not applying a behavioral change theory to inform their development. This work highlights the need to involve patients to co-develop and evaluate a self-management intervention based on sound theories and clinical evidence.

**Key words:** Chronic kidney disease, scoping review, self-management, person centered-care

**Strengths and limitations of this study:**

- A strength of our study is that it is the first scoping review to apply the principles of patient-oriented research, where patient partners were engaged in determining the research question, advising us on search terms and reviewing the results to ensure we captured and reported the data meaningfully.
- Our scoping review is comprehensive in nature, inclusion of all study designs and consideration of self-management features that have not been investigated previously.
- Due to the heterogeneous nature of the literature, it was challenging to synthesize the data. To address this challenge the two reviewers used two standardized tools to independently extract data, and independently coded the outcomes into categories using the Self-and Family Management Framework.
- A limitation of our scoping review is that we were unable to assess the self-management outcomes in terms of sustained changes in behavior, physiological, and health status.

## CKD self-management interventions

- We were unable to draw conclusions regarding the most effective self-management intervention for adult patients with CKD, keeping in mind our aim was to review the breadth of the current literature and present the gaps that exist.

For peer review only

## INTRODUCTION

Chronic kidney disease (CKD) is associated with adverse health outcomes, poor quality of life and high health care costs (1). Patients with CKD often experience a number of comorbidities including diabetes, cardiovascular disease and depression (2). They must balance the medical management of their kidney disease and other chronic conditions with demands of their daily lives, including managing the emotional and psychosocial consequences of living with chronic disease. In a recent CKD research priority setting study, individuals with non-dialysis CKD, their caregivers, clinicians and policy makers identified the need to develop optimal strategies to enable patients to manage their CKD and related comorbidities to slow or prevent the progression to end-stage kidney disease (ESKD) (3). International data in research priority setting for kidney disease also highlights self-management as a top priority to prevent progression (4).

Self-management interventions aim to facilitate an individual's ability to make lifestyle changes and manage symptoms, treatment, and the physical and psychosocial consequences inherent in living with CKD and associated comorbidities (5). Self-management of CKD involves focusing on illness needs (developing knowledge, skills and confidence to manage medical aspects), activating resources (identifying and accessing resources and supports) and living with the condition (learning to cope with the condition and its impact on their lives as well as the emotional consequences of the illness) (6). Self-management requires patient engagement, however, the degree to which patients are able or willing to participate in self-management can vary, and individual and health system factors may serve as facilitators or barriers to self-management processes (7).

## CKD self-management interventions

1  
2  
3 Despite the high prevalence of CKD and its impact on patient outcomes, there is limited  
4  
5 evidence on the effectiveness of self-management interventions. Prior systematic reviews (8 -  
6  
7 11) and three integrative reviews (12-14) found that self-management interventions were  
8  
9 variable in their effectiveness for managing and preventing progression of CKD. While these  
10  
11 reviews add to the knowledge base, they have restricted inclusion criteria (e.g. study type, patient  
12  
13 population) and unclear reporting strategies (i.e. describing complex self-management  
14  
15 interventions in detail and providing structured accounts of the interventions and outcomes). In  
16  
17 particular, features of self-management interventions such as person centeredness, applicability  
18  
19 to co-morbidities associated with CKD, physiological and non-physiological outcomes, and  
20  
21 application of any behavioral change theories are often lacking. Self-management interventions  
22  
23 need to be tailored to suit diverse patient needs and preferences, as well as the local health care  
24  
25 context (7). Therefore, investigating the “who”, “what” and the “how” of self-management  
26  
27 interventions is crucial. We used recognized literature synthesis and reporting guidelines, along  
28  
29 with engagement of our patient partners in determining the research question and search terms,  
30  
31 as well as reviewing the results to ensure we captured and reported the data meaningfully.  
32  
33

34  
35  
36  
37  
38 To our knowledge there is no literature synthesis that systematically and comprehensively  
39  
40 summarizes the breadth of evidence found in primary quantitative, qualitative and mixed  
41  
42 methods research regarding self-management interventions for adult patients with CKD. We  
43  
44 used a scoping review methodology to understand the range and types of interventions including  
45  
46 both educational and support interventions for CKD to inform the future design of a self-  
47  
48 management intervention. Specifically, we conducted a scoping review to identify and describe  
49  
50 self-management interventions for adult patients with CKD (stages 1 – 5; non-dialysis, non-  
51  
52 transplant).  
53  
54  
55  
56  
57  
58  
59  
60

## MATERIALS AND METHODS

We used a scoping review methodology to enable us to incorporate a broad range of studies and to summarize the knowledge from a variety of sources and types of evidence (15). Our aim was to identify gaps in literature related to CKD self-management interventions and inform future research. A unique and important aspect was the involvement of “patient partners”. Through a national initiative, Canadians Seeking Solutions and Innovations to Overcome CKD (Can-SOLVE CKD), patients work side by side with researchers, clinicians and decision makers to address patient-oriented research priorities (16). Our research team includes Can-SOLVE CKD patient partners with CKD and caregivers (16). Using the Joanna Briggs Institute framework for scoping reviews we undertook the following steps: (1) identified the research question, (2) identified relevant studies, (3) completed study selection, (4) charted, collated, summarized and reported the results, and (5) consulted with our patient partners (15, 17). These steps were iterative to ensure comprehensive inclusion of the literature and continued meaningful engagement with our patient partners. This work involves identifying, reviewing and categorizing data from primary articles and does not involve human participants and is exempt from ethics approval.

### Research aim

Our scoping review aimed to determine the available self-management interventions for adults aged 18 years and over and diagnosed with CKD Stages 1 – 5 (not requiring dialysis or transplant).

## Search and selection of studies

We worked with an information specialist (DL) to identify key words that represented the population (CKD) and the intervention (self-management). We searched a broad range of information sources including the following online databases: MEDLINE (OVID), EMBASE, PsycINFO, Cochrane Central Register of Controlled Trials, CINAHL Plus and Cochrane Database of Systematic Reviews for published studies, with no limits on date (inception to October 2016), language, age or study design. We also searched Web of Science from 2006 – October 2016 to capture recently published meeting abstracts and summaries. Using the Canadian Agency for Drugs and Technology (CADTH) Grey Matters approach, (18) we searched Google Canada, Health Technology Assessment (HTA) agencies (Canada, Australia, Ireland, UK and US), and Clinical Trials databases (Biomed Central – ISRCTN Registry, US National Institutes of Health, ClinicalTrials.gov) during October 2016 with no language restrictions (Table S1). Our search strategy for grey literature was guided by the specific database (i.e. Google search operators, website search filters) and was completed within a single session for each search strategy to ensure consistency due to the dynamic nature of the Internet (Table S2). Two reviewers (BK and MD) also reviewed the reference lists of included studies, along with those identified in past systematic and integrative reviews of our research topic. We contacted authors of relevant protocols and conference abstracts to ascertain if their work and findings were published.

A study was included if the population involved adults with CKD (stages 1 – 5, non-dialysis, non-transplant). Self-management interventions included strategies, tools, or resources in any delivery format (print, electronic, face to face, etc.) that facilitated an individual's ability to make

1  
2  
3 lifestyle changes or to manage symptoms, treatment, or the physical and psychosocial  
4 consequences inherent in living with CKD and other associated comorbidities. Interventions  
5 targeted only at selection of treatment for ESKD (i.e. dialysis, kidney transplant) were excluded.  
6  
7 Other self-management interventions or standard care were considered as a comparison. We  
8 included primary studies that used quantitative, qualitative or mixed methods. Systematic and  
9 integrative reviews were identified for the purpose of reviewing their included studies for  
10 potential relevant studies. We excluded case series, case studies, case reports, clinical practice  
11 guidelines, theses and opinion-driven reports (editorials, non-systematic or literature/narrative  
12 reviews).

13  
14 Three reviewers (BK, MD, and BH) performed an initial screen of titles and abstracts using a  
15 citation screening tool. To determine inter-rater reliability, a calibration exercise was performed  
16 by the three reviewers. Pilot testing a random sample of 50 citations achieved good agreement  
17 (kappa = 0.79) at which point the three reviewers screened the remaining titles and abstracts.  
18  
19 Two reviewers (BK and MD) followed a similar procedure for identifying relevant full text  
20 studies, with good agreement between the two reviewers (kappa = 0.78). Disagreements were  
21 resolved by discussion and obtaining consensus between the three reviewers.  
22  
23

### 24 **Charting, collating and summarizing the data**

25  
26 We developed a data extraction form based on the Template for Intervention Description and  
27 Replication (TIDierR) checklist (19). This checklist provides a template to structure accounts of  
28 an intervention (e.g. goal of intervention, materials used, who delivered the intervention and  
29 how, where, when and how much, and how well the intervention was delivered). We also used  
30 the Effective Practice and Organization of Care (EPOC) data collection form (20) to ensure we  
31 were comprehensive in extracting relevant study characteristics as outlined by Cochrane EPOC  
32  
33  
34  
35  
36  
37  
38  
39  
40  
41  
42  
43  
44  
45  
46  
47  
48  
49  
50  
51  
52  
53  
54  
55  
56  
57  
58  
59  
60



## CKD self-management interventions

1  
2  
3 group. Study characteristics (e.g. study design, country of origin, publication year), population  
4 characteristics (e.g. CKD stage, comorbidities), and self-management intervention characteristics  
5 (e.g. topics, format, target audience, providers, location, dose, duration, etc.) were documented.  
6  
7  
8 For the study outcomes, the two reviewers (BK and MD) independently coded each outcome into  
9 categories identified by Grey et al (e.g. behaviors, cognitions, physiological measures,  
10 symptoms, health status, health care and other) (6). We pilot tested the form on a random sample  
11 of 10 eligible studies and once consensus between the two reviewers was reached, we  
12 independently abstracted data from the remaining eligible studies. Data was categorized and  
13 reported descriptively (i.e. counts and frequencies). For qualitative studies we identified the  
14 methodology and key concepts presented by the authors.  
15  
16  
17  
18  
19  
20  
21  
22  
23  
24  
25

**Consultation with patient partners**

26  
27 Patient partners were engaged throughout this work, specifically to provide input on the research  
28 question, search strategies (e.g. grey literature sources) and reviewing the final results. The  
29 results were presented and discussed at the national Can-SOLVE CKD meeting.  
30  
31  
32  
33  
34  
35  
36

**RESULTS****Search results**

37  
38 From 12,583 unique citations (Figure 1) we included 50 full text studies (21-70).  
39  
40  
41  
42

**Description of studies**

43  
44 A summary of the 50 studies included in this review is provided in Table 1.  
45  
46  
47  
48  
49  
50  
51  
52  
53  
54  
55  
56  
57  
58  
59  
60

1  
2  
3  
4  
5  
6  
7  
8  
9  
10  
11  
12  
13  
14  
15  
16  
17  
18  
19  
20  
21  
22  
23  
24  
25  
26  
27  
28  
29  
30  
31  
32  
33  
34  
35  
36  
37  
38  
39  
40  
41  
42  
43  
44  
45  
46  
47  
48  
49  
50  
51  
52  
53  
54  
55  
56  
57  
58  
59  
60

For peer review only

## CKD self-management interventions

**Table 1** Characteristics of the studies included in scoping review

| Characteristic                             | Studies (N = 50) |
|--------------------------------------------|------------------|
| <b>Study design</b>                        |                  |
| Randomized controlled trial                | 19               |
| Pre-post test                              | 13               |
| Quasi-experimental (controlled/non-random) | 7                |
| Observational                              | 5                |
| Qualitative                                | 5                |
| Mixed methods                              | 1                |
| <b>Origin of study</b>                     |                  |
| United States                              | 10               |
| United Kingdom                             | 7                |
| Australia                                  | 6                |
| Canada                                     | 5                |
| Taiwan                                     | 5                |
| Netherlands                                | 3                |
| Spain                                      | 3                |
| Italy                                      | 2                |
| Japan                                      | 2                |
| New Zealand                                | 2                |
| Sweden                                     | 2                |
| Brazil                                     | 1                |
| Denmark                                    | 1                |
| Korea                                      | 1                |
| <b>Year of publication</b>                 |                  |
| 2012 – 2016                                | 32               |
| 2007 – 2011                                | 11               |
| Prior                                      | 7                |

The most common study designs were randomized controlled trials (RCTs) (38%). Non-RCTs consisted of quasi-experimental (14%), observational (10%), pre-post intervention (26%), qualitative (10%) and mixed methods (2%). The studies were conducted in 14 countries, including the United States (20%), United Kingdom (14%) and Australia (12%). Most studies were published in the last five years (64%).

### **Patient population characteristics**

The target population in most studies was CKD (72%) and 15 studies mentioned CKD plus one or more associated comorbidities. The average ages of participants reported across studies were 50.2 to 74.3 years.

### **Description of self-management interventions**

Table 2 summarizes the characteristics of the self-management interventions. Five studies reported the same self-management intervention (21-25), therefore 45 interventions were summarized. The most common intervention topic was diet/nutrition (64%) and the least common were symptom management and lifestyle (13% and 11% respectively). The most frequent modes of delivering the intervention were face to face (80%), multiple (i.e. more than one mode) (71%) and print (64%). Electronic was the least common delivery mode (16%). Interventions were administered by a variety of providers. The most common category of providers was “other” (56%), which was made up of various types of health professionals and lay people. However, the most common identifiable group of providers were nursing professionals (49%). Patient volunteer/mentor was the least common (9%). The outpatient setting was the most common location for providing the self-management intervention (51%), and the inpatient setting was the least popular (2%). Many studies did not report the intervention language (53%), but 12 languages were represented and seven studies reported that they provided the intervention in multiple languages.

In terms of intervention development, only 20% of studies mentioned the use of evidence such as theories or frameworks. These included the transtheoretical model of behavior change, social cognitive theory and chronic care model (26-30). Less than 1% of the studies involved patients in

## CKD self-management interventions

the design of the intervention, where patients were interviewed regarding intervention content (26, 31-33).

**Table 2** Overall characteristics of self-management interventions

| Variable                                        | Intervention count (N = 45) |
|-------------------------------------------------|-----------------------------|
| <b>Intervention topics</b>                      |                             |
| Diet/nutrition                                  | 29                          |
| General CKD knowledge                           | 18                          |
| Other (i.e. advanced care planning, meditation) | 18                          |
| Medication                                      | 17                          |
| Modalities                                      | 13                          |
| Physical activity                               | 13                          |
| Comorbidities                                   | 11                          |
| Symptom management                              | 6                           |
| Lifestyle                                       | 5                           |
| <b>Mode of Delivery</b>                         |                             |
| Face to face (i.e. group, one-on-one)           | 36                          |
| Multiple modes                                  | 32                          |
| Print                                           | 29                          |
| Distance (i.e. telephone, email)                | 13                          |
| Digital (i.e. DVD, PowerPoint, audio recording) | 8                           |
| Electronic (i.e. website, mobile application)   | 7                           |
| <b>Type of providers</b>                        |                             |
| Other*                                          | 25                          |
| Nurse/nurse practitioner                        | 22                          |
| Dietitian                                       | 14                          |
| Multiple providers                              | 13                          |
| Social worker                                   | 6                           |
| Physician/primary care physician                | 6                           |
| Nephrologist/nephrology fellows                 | 5                           |
| Patient volunteer/mentor                        | 4                           |
| Pharmacist                                      | 1                           |
| <b>Location of intervention</b>                 |                             |
| Outpatient                                      | 23                          |
| Not specified                                   | 12                          |
| Community (non-clinic)**                        | 10                          |
| Patient home                                    | 10                          |
| Multiple locations                              | 7                           |
| Inpatient                                       | 1                           |
| <b>Intervention languages</b>                   |                             |
| Not Specified                                   | 24                          |

## CKD self-management interventions

|                                 |    |
|---------------------------------|----|
| English                         | 10 |
| Multiple languages              | 7  |
| Mandarin                        | 4  |
| Spanish                         | 3  |
| Taiwanese                       | 3  |
| Dutch                           | 2  |
| Cantonese                       | 1  |
| French                          | 1  |
| Greek                           | 1  |
| Italian                         | 1  |
| Japanese                        | 1  |
| Swedish                         | 1  |
| Vietnamese                      | 1  |
| <b>Intervention development</b> |    |
| Use of framework or theory      | 9  |
| Co-designed with patients       | 4  |

## CKD self-management interventions

**Description of quantitative study outcomes and results**

Characteristics of the quantitative study outcomes are presented in Table 3. Twenty-three (46%) studies measured physiological outcomes (i.e. laboratory tests, body composition, etc.). The least common outcomes reported by studies were health status and health care (each 10%) and symptoms (i.e. fatigue) (4%). Table 4 summarizes the details of the quantitative studies. We categorized the overall study results descriptively as improved, unchanged, or worse. Many studies had more than one outcome measure (e.g. one measure improved, another had no change) and they were reported as mixed results. Based on this method of categorization, 89 outcomes were reported, of which 61% improved, 20% had no change, 1% worsened, and 13% had mixed results. Four of the results were reported as not applicable as the outcomes were not relevant. Of the 54 outcome categories that improved, 15 were cognition, nine were physiological measures, eight were behaviors, eight were individual outcomes, five were health status, four were health care, four were intervention specific, and one was symptom management.

**Table 3** Summary of quantitative study outcomes\*

| <b>Common outcomes</b> | <b>Description</b>                                                                                                   | <b>Number of studies</b> | <b>Number of studies in which outcome improved</b> |
|------------------------|----------------------------------------------------------------------------------------------------------------------|--------------------------|----------------------------------------------------|
| Physiologic measures   | Changes in laboratory tests, blood pressure, body composition, functional/performance tests and cardiovascular risk. | 23                       | 9                                                  |
| Cognitions             | Changes in general CKD knowledge, self-efficacy, self-management, motivation, perceived stress, anxiety and fear.    | 21                       | 15                                                 |
| Behaviors              | Adherence to diet, medication, physical activity, sleep, blood pressure control.                                     | 13                       | 8                                                  |
| Individual outcomes    | QOL, well-being and general satisfaction.                                                                            | 11                       | 8                                                  |
| Intervention specific  | Reporting of general concepts regarding feasibility of intervention, enjoyment and interest in intervention.         | 9                        | 4                                                  |
| Health care            | Measurements of cost effectiveness, health care utilization and access.                                              | 5                        | 4                                                  |
| Health status          | Measurements of morbidity and mortality (i.e. time to dialysis, survival, all-cause mortality).                      | 5                        | 5                                                  |
| Symptoms               | Changes in overall symptoms (i.e. pain, fatigue)                                                                     | 2                        | 1                                                  |

\* Based on primary and distal outcomes from Grey et al (6)

CKD – chronic kidney disease; QOL – quality of life



## CKD self-management interventions

Table 4 Summary of quantitative studies

| Study & Year (Reference) | Design | Target Population                                                                   | Study Size Age (years)                                     | Intervention Topic(s)                                                                                                                                       | Provider(s)                | Delivery Format                                                                                          | Description of Intervention                                                                                                                                                                                                                                                                                                                                                                               | Study Outcomes                                                                                                                                                                                      | Study Results |
|--------------------------|--------|-------------------------------------------------------------------------------------|------------------------------------------------------------|-------------------------------------------------------------------------------------------------------------------------------------------------------------|----------------------------|----------------------------------------------------------------------------------------------------------|-----------------------------------------------------------------------------------------------------------------------------------------------------------------------------------------------------------------------------------------------------------------------------------------------------------------------------------------------------------------------------------------------------------|-----------------------------------------------------------------------------------------------------------------------------------------------------------------------------------------------------|---------------|
| <b>RCT</b>               |        |                                                                                     |                                                            |                                                                                                                                                             |                            |                                                                                                          |                                                                                                                                                                                                                                                                                                                                                                                                           |                                                                                                                                                                                                     |               |
| Binik 1993 (34)          | RCT    | Pre-RRT CKD (creatinine $\geq 350$ $\mu\text{mol/L}$ and rising rapidly)            | 204 (E = 87, C = 92, not part of education = 25) Age: 50.2 | <ul style="list-style-type: none"> <li>General CKD knowledge</li> <li>Diet/nutrition</li> <li>Modalities</li> </ul>                                         | Trained research assistant | <ul style="list-style-type: none"> <li>Print</li> <li>Face to face</li> <li>PowerPoint slides</li> </ul> | <p>“Enhanced education”:</p> <ul style="list-style-type: none"> <li>22-page booklet</li> <li>Individual slide presentation (75 mins)</li> </ul> <p>Duration – one session<br/>Comparator: standard care</p>                                                                                                                                                                                               | <p>Health Status:</p> <ul style="list-style-type: none"> <li>Duration between session &amp; dialysis initiation – <i>patient in E group survived 4.6 months longer w/o requiring RRT</i></li> </ul> |               |
| Gillis 1995 (35)         | RCT    | CKD 3-5                                                                             | 840 (unclear) Age: NR                                      | <ul style="list-style-type: none"> <li>Diet/nutrition</li> </ul>                                                                                            | Dietician                  | <ul style="list-style-type: none"> <li>Print</li> <li>Face to face</li> </ul>                            | <p>“Modification of diet in renal disease”:</p> <ul style="list-style-type: none"> <li>“Keeping Track” booklet</li> <li>Monthly meeting with dietician</li> <li>Protein Wise Counter (lists protein content of foods)</li> <li>“Shopping Wise”: a guide to convenience and fast foods</li> <li>Visited restaurants and shops</li> </ul> <p>Duration – 26 months<br/>Comparator: standard protein diet</p> | <p>Cognitions:</p> <ul style="list-style-type: none"> <li>Patient reliance on dietician’s feedback, support and modeling strategies - <i>decreased over time in E group</i></li> </ul>              |               |
|                          |        |                                                                                     |                                                            |                                                                                                                                                             |                            |                                                                                                          |                                                                                                                                                                                                                                                                                                                                                                                                           | <p>Individual Outcomes:</p> <ul style="list-style-type: none"> <li>Top rated interventions by patients - <i>counseling, self-monitoring, protein counter</i></li> </ul>                             |               |
| Devins 2003 (36)         | RCT    | CKD (creatinine $\leq 300$ $\mu\text{mol/L}$ and deemed to need RRT in 6-18 months) | 297 (E = 149, C = 148) Age: 58.6                           | <ul style="list-style-type: none"> <li>General CKD knowledge</li> <li>Diet/nutrition</li> <li>Medication</li> <li>Modalities</li> <li>Lifestyles</li> </ul> | Social worker              | <ul style="list-style-type: none"> <li>Print</li> <li>Face to face</li> <li>Telephone</li> </ul>         | <p>“Psychoeducation”:</p> <ul style="list-style-type: none"> <li>60-page booklet</li> <li>90 min interactive educational intervention personalized for each patient</li> <li>Supportive (10 min max) phone calls Q3 weeks</li> </ul> <p>Duration – 18 months or initiation of RRT</p>                                                                                                                     | <p>Health Status:</p> <ul style="list-style-type: none"> <li>Time to dialysis – <i>E group had 3 month delay in dialysis compared to C group</i></li> </ul>                                         |               |

## CKD self-management interventions

|    |                          |     |                                                               |                                                    |                                                                                                                                                                                             |                                                                 |                                                                                                                |                                                                                                                                                                                                                                                                                                                              |                         |                                                                                                                                                                                                                                                                                                               |  |
|----|--------------------------|-----|---------------------------------------------------------------|----------------------------------------------------|---------------------------------------------------------------------------------------------------------------------------------------------------------------------------------------------|-----------------------------------------------------------------|----------------------------------------------------------------------------------------------------------------|------------------------------------------------------------------------------------------------------------------------------------------------------------------------------------------------------------------------------------------------------------------------------------------------------------------------------|-------------------------|---------------------------------------------------------------------------------------------------------------------------------------------------------------------------------------------------------------------------------------------------------------------------------------------------------------|--|
| 1  |                          |     |                                                               |                                                    |                                                                                                                                                                                             |                                                                 |                                                                                                                |                                                                                                                                                                                                                                                                                                                              |                         |                                                                                                                                                                                                                                                                                                               |  |
| 2  |                          |     |                                                               |                                                    |                                                                                                                                                                                             |                                                                 |                                                                                                                |                                                                                                                                                                                                                                                                                                                              |                         |                                                                                                                                                                                                                                                                                                               |  |
| 3  |                          |     |                                                               |                                                    |                                                                                                                                                                                             |                                                                 |                                                                                                                |                                                                                                                                                                                                                                                                                                                              |                         |                                                                                                                                                                                                                                                                                                               |  |
| 4  | Devins<br>2005<br>(37)   | RCT | CKD with<br>progressive<br>reduction in<br>kidney<br>function | 335<br>(E = 172,<br>C = 163)<br>Age: 47.4-<br>53.9 | <ul style="list-style-type: none"> <li>• General CKD Knowledge</li> <li>• Diet/nutrition</li> <li>• Modalities</li> </ul>                                                                   | Health educator                                                 | <ul style="list-style-type: none"> <li>• Print</li> <li>• Face to face</li> <li>• PowerPoint slides</li> </ul> | <p>“Psychoeducation session”:</p> <ul style="list-style-type: none"> <li>• 22-page booklet</li> <li>• Individual slide presentation (60-75 min long)</li> </ul> <p>Duration – one visit</p> <p>Comparator: standard care</p>                                                                                                 | Health Status:          | <ul style="list-style-type: none"> <li>• Survival pre-dialysis and after dialysis initiation – <i>significantly longer in the E group (2.25 years and 8 months respectively)</i></li> </ul>                                                                                                                   |  |
| 9  | Campbell<br>2008<br>(38) | RCT | CKD 4-5                                                       | 47<br>(E = 24,<br>C = 23)<br>Age: 68.5-<br>72.6    | <ul style="list-style-type: none"> <li>• Diet/nutrition</li> <li>• Other (i.e. self-management principles)</li> </ul>                                                                       | Dietician                                                       | <ul style="list-style-type: none"> <li>• Face to face</li> <li>• Telephone</li> </ul>                          | <p>“Individual nutritional counseling”:</p> <ul style="list-style-type: none"> <li>• Initial individual consultation with dietician</li> <li>• Then phone follow-up Q2 weeks x 1 month then Q1 month</li> </ul> <p>Duration: 12 weeks</p> <p>Comparator: standard care</p>                                                   | Individual outcomes:    | <ul style="list-style-type: none"> <li>• QOL – <i>many components of KDQOLSF v1.3 improved: □CKD symptoms, □cognitive function, vitality*</i></li> </ul>                                                                                                                                                      |  |
| 15 |                          |     |                                                               |                                                    |                                                                                                                                                                                             |                                                                 |                                                                                                                |                                                                                                                                                                                                                                                                                                                              |                         |                                                                                                                                                                                                                                                                                                               |  |
| 16 |                          |     |                                                               |                                                    |                                                                                                                                                                                             |                                                                 |                                                                                                                |                                                                                                                                                                                                                                                                                                                              |                         |                                                                                                                                                                                                                                                                                                               |  |
| 17 |                          |     |                                                               |                                                    |                                                                                                                                                                                             |                                                                 |                                                                                                                |                                                                                                                                                                                                                                                                                                                              |                         |                                                                                                                                                                                                                                                                                                               |  |
| 18 |                          |     |                                                               |                                                    |                                                                                                                                                                                             |                                                                 |                                                                                                                |                                                                                                                                                                                                                                                                                                                              |                         |                                                                                                                                                                                                                                                                                                               |  |
| 19 |                          |     |                                                               |                                                    |                                                                                                                                                                                             |                                                                 |                                                                                                                |                                                                                                                                                                                                                                                                                                                              |                         |                                                                                                                                                                                                                                                                                                               |  |
| 20 | Byrne 2011<br>(26)       | RCT | CKD 1-4 +<br>HTN                                              | 81<br>(E = 40,<br>C = 41)<br>Age: 62.8-<br>65.4    | <ul style="list-style-type: none"> <li>• Comorbidities (i.e. HTN management)</li> </ul>                                                                                                     | Nurse                                                           | <ul style="list-style-type: none"> <li>• Print</li> <li>• Face to face</li> <li>• Telephone</li> </ul>         | <p>“Structured education session”:</p> <ul style="list-style-type: none"> <li>• Leaflet on HTN management</li> <li>• CHEERS patient education intervention, and standard care</li> <li>• 2.5 hour group session</li> <li>• Phone support from nurse</li> </ul> <p>Duration: one session</p> <p>Comparator: standard care</p> | Intervention specific:  | <ul style="list-style-type: none"> <li>• Feasibility (recruitment, retention, patient satisfaction, patient access of additional support) - <i>findings suggest delivering/evaluating an effective structured group educational intervention to promote better BP control would be challenging</i></li> </ul> |  |
| 28 | Chen<br>2011<br>(39)     | RCT | CKD 3-5                                                       | 54<br>(E = 27,<br>C = 27)<br>Age: 68.2             | <ul style="list-style-type: none"> <li>• General CKD knowledge</li> <li>• Diet/nutrition</li> <li>• Medication</li> <li>• Lifestyle</li> <li>• Modality information for stage IV</li> </ul> | Nurse, dietician,<br>nephrologist,<br>peers, volunteers         | <ul style="list-style-type: none"> <li>• Print</li> <li>• Face to face</li> <li>• Telephone</li> </ul>         | <p>“Self-management Support”:</p> <ul style="list-style-type: none"> <li>• Individual monthly health education</li> <li>• Weekly telephone based support</li> <li>• Aid of support group twice monthly (5 – 10 patients)</li> </ul> <p>Duration: 12 months</p> <p>Comparator: standard care</p>                              | Physiological measures: | <ul style="list-style-type: none"> <li>• eGFR change – <i>higher in E group</i></li> <li>• eGFR reduction of &gt;50% - <i>less in E group</i></li> <li>• ESRD requiring RRT and all-cause mortality – <i>no significant difference between groups</i></li> </ul>                                              |  |
| 35 |                          |     |                                                               |                                                    |                                                                                                                                                                                             |                                                                 |                                                                                                                |                                                                                                                                                                                                                                                                                                                              |                         |                                                                                                                                                                                                                                                                                                               |  |
| 36 |                          |     |                                                               |                                                    |                                                                                                                                                                                             |                                                                 |                                                                                                                |                                                                                                                                                                                                                                                                                                                              |                         |                                                                                                                                                                                                                                                                                                               |  |
| 37 |                          |     |                                                               |                                                    |                                                                                                                                                                                             |                                                                 |                                                                                                                |                                                                                                                                                                                                                                                                                                                              |                         |                                                                                                                                                                                                                                                                                                               |  |
| 38 | Flesher<br>2011<br>(40)  | RCT | CKD 3-4 +<br>HTN                                              | 40<br>(E = 23,<br>C = 17)<br>Age: 63.4             | <ul style="list-style-type: none"> <li>• Diet/nutrition</li> <li>• Physical activity</li> </ul>                                                                                             | Nurse, exercise<br>physiologist,<br>dietician, cook<br>educator | <ul style="list-style-type: none"> <li>• Print</li> <li>• Face to face</li> </ul>                              | <p>“Cooking and exercise class”:</p> <ul style="list-style-type: none"> <li>• Standard care and:</li> <li>• Group CKD nutrition class (with dietician and cook educator: 2 hour</li> </ul>                                                                                                                                   | Physiological measures: | <ul style="list-style-type: none"> <li>• Improvement in 4/5 of the following: urinary protein, total cholesterol, eGFR decline, BP, urinary sodium – <i>was considered a</i></li> </ul>                                                                                                                       |  |

CKD self-management interventions

|                    |     |                                              |                                |                                                                                                                               |                    |                                                                                                                                     |                                                                                                                                                                                                                                                                                                                                                                                                                   |                                                                                                                                                                                                                                                                                                                                                                                                            |                                     |
|--------------------|-----|----------------------------------------------|--------------------------------|-------------------------------------------------------------------------------------------------------------------------------|--------------------|-------------------------------------------------------------------------------------------------------------------------------------|-------------------------------------------------------------------------------------------------------------------------------------------------------------------------------------------------------------------------------------------------------------------------------------------------------------------------------------------------------------------------------------------------------------------|------------------------------------------------------------------------------------------------------------------------------------------------------------------------------------------------------------------------------------------------------------------------------------------------------------------------------------------------------------------------------------------------------------|-------------------------------------|
|                    |     |                                              |                                |                                                                                                                               |                    |                                                                                                                                     | <p>sessions over 4 weeks) plus 1 shopping tour led by a dietician</p> <ul style="list-style-type: none"> <li>• CKD cookbook</li> <li>• 12 week exercise program (3 X 1 hour sessions/week) led by a certified exercise physiologist &amp; nurse</li> </ul> <p><i>Duration: 12 weeks</i><br/><i>Comparator: standard care</i></p>                                                                                  | <p>success – 61% in E group vs. 12% in C group</p> <p>Behaviors:</p> <ul style="list-style-type: none"> <li>• SM score – some changes in some components in both groups</li> </ul>                                                                                                                                                                                                                         |                                     |
| Joboshi 2012 (41)  | RCT | CKD                                          | 31 (E = 19, C = 12) Age: 69.8  | <ul style="list-style-type: none"> <li>• Other</li> </ul>                                                                     | Nurse              | <ul style="list-style-type: none"> <li>• Face to face</li> <li>• Telephone</li> <li>• Email</li> </ul>                              | <p>“EASE (encourage autonomous self-enrichment) program”:</p> <ul style="list-style-type: none"> <li>• Nurses listen to what patients have difficulties and discuss how they will try to improve</li> <li>• Face to face interview monthly</li> <li>• Telephone or email contact every 2 weeks</li> </ul> <p><i>Duration: 12 weeks</i><br/><i>Comparator: standard care</i></p>                                   | <p>Cognitions:</p> <ul style="list-style-type: none"> <li>• Self-efficacy</li> </ul> <p>Behaviors:</p> <ul style="list-style-type: none"> <li>• Medication adherence</li> <li>• Adherence to BP and weight measurements</li> <li>• Limiting salt intake</li> <li>• Alcohol consumption</li> <li>• Smoking</li> </ul> <p>Physiological measures:</p> <ul style="list-style-type: none"> <li>• BP</li> </ul> | <p>●</p> <p>●</p> <p>●</p> <p>●</p> |
| Williams 2012 (42) | RCT | CKD 2-4 (diabetic kidney disease) + DM + HTN | 75 (E = 39, C = 41) Age: 67    | <ul style="list-style-type: none"> <li>• Medication</li> <li>• Comorbidities</li> </ul>                                       | Nurse              | <ul style="list-style-type: none"> <li>• Print</li> <li>• Face to face</li> <li>• Telephone</li> <li>• DVD</li> </ul>               | <p>“Multifactorial intervention”:</p> <ul style="list-style-type: none"> <li>• Individual medication review (draw chart)</li> <li>• Daily self-monitoring of BP x 3 months</li> <li>• 20 min DVD</li> <li>• Q2 week motivational interviewing follow up via phone x 12 weeks to support BP management and optimize medication SM</li> </ul> <p><i>Duration: 12 weeks</i><br/><i>Comparator: standard care</i></p> | <p>Physiological measures:</p> <ul style="list-style-type: none"> <li>• BP – no difference between groups</li> </ul> <p>Behaviors:</p> <ul style="list-style-type: none"> <li>• Medication adherence – no difference between groups</li> </ul>                                                                                                                                                             | <p>●</p> <p>●</p>                   |
| Williams 2012 (43) | RCT | CKD 2-4 + DM + cardiovascular disease        | 78 (E = 40, C = 38) Age: 74.31 | <ul style="list-style-type: none"> <li>• Medication</li> <li>• Comorbidities</li> <li>• Other (i.e. self-efficacy)</li> </ul> | Nurse, interpreter | <ul style="list-style-type: none"> <li>• Print</li> <li>• Face to face</li> <li>• Telephone</li> <li>• PowerPoint slides</li> </ul> | <p>“Self-efficacy Medication Intervention (SEM)”:</p> <ul style="list-style-type: none"> <li>• Individual medication review – chart in English but interpreter wrote on medication boxes in patients language or used symbols</li> </ul>                                                                                                                                                                          | <p>Intervention specific:</p> <ul style="list-style-type: none"> <li>• Attrition rate to assess feasibility of study – high attrition</li> </ul> <p>Cognitions:</p> <ul style="list-style-type: none"> <li>• Medication self-efficacy – no difference between groups</li> </ul>                                                                                                                            | <p>●</p> <p>●</p>                   |

## CKD self-management interventions

|                        |     |                                                |                                    |                                                                                                |                              |                                                                                                  |                                                                                                                                                                                                                                                                                                                                                                                                                                                                                                                                                                       |                                                                                                                                                                                                                                                                                                                                                                                                                                                                                                                            |                                                                                                                                                                                                                                                                                                                                                          |
|------------------------|-----|------------------------------------------------|------------------------------------|------------------------------------------------------------------------------------------------|------------------------------|--------------------------------------------------------------------------------------------------|-----------------------------------------------------------------------------------------------------------------------------------------------------------------------------------------------------------------------------------------------------------------------------------------------------------------------------------------------------------------------------------------------------------------------------------------------------------------------------------------------------------------------------------------------------------------------|----------------------------------------------------------------------------------------------------------------------------------------------------------------------------------------------------------------------------------------------------------------------------------------------------------------------------------------------------------------------------------------------------------------------------------------------------------------------------------------------------------------------------|----------------------------------------------------------------------------------------------------------------------------------------------------------------------------------------------------------------------------------------------------------------------------------------------------------------------------------------------------------|
|                        |     |                                                |                                    |                                                                                                |                              |                                                                                                  | <ul style="list-style-type: none"> <li>Individual slide presentation (20 minutes) via interpreter (Greek, Italian, Vietnamese)</li> <li>Q2 week motivational interviewing follow-up via phone x 12 weeks</li> </ul> <i>Duration: 12 weeks</i><br><i>Comparator: standard care</i>                                                                                                                                                                                                                                                                                     | <p>Health care:</p> <ul style="list-style-type: none"> <li>Health care utilization – <i>no difference between groups</i></li> </ul> <p>Physiological measures:</p> <ul style="list-style-type: none"> <li>Routine clinical lab surrogate measures – <i>no difference</i></li> </ul> <p>Behaviors:</p> <ul style="list-style-type: none"> <li>Medication adherence – <i>no difference</i></li> </ul> <p>Individual outcomes:</p> <ul style="list-style-type: none"> <li>General wellbeing – <i>no difference</i></li> </ul> | <br><br><br> |
| De Brito 2013 (44)     | RCT | CKD 3-5 + HTN (BP>130/80) + Bengali population | 56 (E = 28, C = 28) Age: 55.7-60.7 | <ul style="list-style-type: none"> <li>Diet/nutrition</li> </ul>                               | Dietician and Bengali worker | <ul style="list-style-type: none"> <li>Face to face</li> <li>Telephone</li> </ul>                | <p>“Diet advice “:</p> <ul style="list-style-type: none"> <li>Practical cooking &amp; education sessions in the community facilitated by a Bengali worker</li> <li>Followed by Q2 week phone calls to reinforce advice and set new targets</li> </ul> <i>Duration: 6 months</i><br><i>Comparator: Standard care</i>                                                                                                                                                                                                                                                   | <p>Physiological measures:</p> <ul style="list-style-type: none"> <li>BP – <i>decreased by 8mmHg in E group</i></li> <li>24 hour urinary salt excretion – <i>decrease in E group</i></li> <li>eGFR – <i>no difference between groups</i></li> </ul>                                                                                                                                                                                                                                                                        |                                                                                                                                                                                                                                                                       |
| Paes-Barreto 2013 (45) | RCT | CKD 3-5                                        | 89 (E = 43, C = 46) Age: 63.4      | <ul style="list-style-type: none"> <li>Diet/nutrition</li> </ul>                               | Dietician                    | <ul style="list-style-type: none"> <li>Print</li> <li>Face to face</li> <li>Telephone</li> </ul> | <p>“Nutrition Education Program”:</p> <ul style="list-style-type: none"> <li>Standard dietary counseling AND</li> <li>Education folder with recipes to replace salt with sodium free seasoning blends</li> <li>Individual 15-20 minute class</li> <li>Hands on session about protein rich food</li> <li>Hands on session using test tubes with the amount of salt in different foods</li> <li>4 monthly follow up visits</li> <li>Telephone call to address any doubts with dietary plan</li> </ul> <i>Duration: 4 – 7 months</i><br><i>Comparator: standard care</i> | <p>Behaviors:</p> <ul style="list-style-type: none"> <li>Reduction in protein intake – <i>decreased</i></li> <li>Adherence to low protein diet – <i>effective</i></li> </ul> <p>Physiological measures:</p> <ul style="list-style-type: none"> <li>Body composition: waist circumference, body fat, BMI, mid-arm muscle circumference – <i>no change</i></li> <li>Serum albumin – <i>no change</i></li> </ul>                                                                                                              | <br>                                                                                                                                                                             |
| Blakeman 2014 (46)     | RCT | CKD 3                                          | 436 (E = 215, C = 221) Age: 72.1   | <ul style="list-style-type: none"> <li>General CKD knowledge</li> <li>Comorbidities</li> </ul> | Lay health worker            | <ul style="list-style-type: none"> <li>Print</li> <li>Website</li> <li>Telephone</li> </ul>      | <p>“Information and telephone-guided access to community services”:</p> <ul style="list-style-type: none"> <li>Kidney Information Guidebook</li> </ul>                                                                                                                                                                                                                                                                                                                                                                                                                | <p>Cognitions:</p> <ul style="list-style-type: none"> <li>Positive &amp; active engagement in life (heiQ) – <i>no difference between groups</i></li> </ul>                                                                                                                                                                                                                                                                                                                                                                 |                                                                                                                                                                                                                                                                     |

CKD self-management interventions

|                   |     |                                                       |                                       |                                                                                         |                                                                                                      |                                                                                             |                                                                                                                                                                                                                                                                                                                                                                                                                                                                                                            |                                                                                                                                                                                                   |  |
|-------------------|-----|-------------------------------------------------------|---------------------------------------|-----------------------------------------------------------------------------------------|------------------------------------------------------------------------------------------------------|---------------------------------------------------------------------------------------------|------------------------------------------------------------------------------------------------------------------------------------------------------------------------------------------------------------------------------------------------------------------------------------------------------------------------------------------------------------------------------------------------------------------------------------------------------------------------------------------------------------|---------------------------------------------------------------------------------------------------------------------------------------------------------------------------------------------------|--|
|                   |     |                                                       |                                       | <ul style="list-style-type: none"> <li>• Other (i.e. community resources)</li> </ul>    |                                                                                                      |                                                                                             | <ul style="list-style-type: none"> <li>• Patient-Led Assessment for Network Support “PLANS” booklet and interactive website – tailored access to community resources</li> <li>• Telephone guided help from a lay health worker</li> </ul> <p><i>Duration: 6 months</i><br/><i>Comparator: standard care</i></p>                                                                                                                                                                                            | <p>Physiological measures:</p> <ul style="list-style-type: none"> <li>• BP control – <i>better BP maintenance in E group</i></li> </ul>                                                           |  |
|                   |     |                                                       |                                       |                                                                                         |                                                                                                      |                                                                                             |                                                                                                                                                                                                                                                                                                                                                                                                                                                                                                            | <p>Individual outcomes:</p> <ul style="list-style-type: none"> <li>• Health related QOL (EuroQoL EQ-5D index) – <i>higher in E group</i></li> </ul>                                               |  |
| McManus 2014 (47) | RCT | HTN (BP>130/80) + CKD3 or DM or CHD                   | 555 (E = 277, C = 278) Age: 69.3-69.6 | <ul style="list-style-type: none"> <li>• Medication</li> <li>• Comorbidities</li> </ul> | General practitioner, patient                                                                        | <ul style="list-style-type: none"> <li>• Print</li> <li>• Face to face</li> </ul>           | <p>“Self-monitoring of BP and self-titration of medications”:</p> <ul style="list-style-type: none"> <li>• Self-monitoring of BP</li> <li>• Self-titration of medications following a 3-step plan designed by general practitioner and patient</li> </ul> <p><i>Duration: 12 months</i><br/><i>Comparator: standard care</i></p>                                                                                                                                                                           | <p>Physiological measures:</p> <ul style="list-style-type: none"> <li>• SBP at 12months – <i>no difference</i></li> </ul>                                                                         |  |
|                   |     |                                                       |                                       |                                                                                         |                                                                                                      |                                                                                             |                                                                                                                                                                                                                                                                                                                                                                                                                                                                                                            | <p>Health care:</p> <ul style="list-style-type: none"> <li>• Prescription of anti-hypertensive medications – <i>increased in both groups but greater significance in E group</i></li> </ul>       |  |
|                   |     |                                                       |                                       |                                                                                         |                                                                                                      |                                                                                             |                                                                                                                                                                                                                                                                                                                                                                                                                                                                                                            | <p>Symptom mgmt.:</p> <ul style="list-style-type: none"> <li>• Adverse effects – <i>no significant difference between groups</i></li> </ul>                                                       |  |
|                   |     |                                                       |                                       |                                                                                         |                                                                                                      |                                                                                             |                                                                                                                                                                                                                                                                                                                                                                                                                                                                                                            | <ul style="list-style-type: none"> <li>• Individual outcomes:</li> <li>• QOL - <i>no significant difference between groups</i></li> </ul>                                                         |  |
| Park 2014 (48)    | RCT | CKD3 + HTN + African American                         | 15 Age: 58.7                          | <ul style="list-style-type: none"> <li>• Other (i.e. meditation)</li> </ul>             | Principle investigator, patient                                                                      | <ul style="list-style-type: none"> <li>• Face to face</li> <li>• Audio recording</li> </ul> | <p>“Mindfulness meditation (MM)”</p> <ul style="list-style-type: none"> <li>• 14 min of pre-recorded guided MM using MP3 player &amp; headphones</li> </ul> <p><i>Duration: one session</i><br/><i>Comparator: BP education</i></p>                                                                                                                                                                                                                                                                        | <p>Physiological measures:</p> <ul style="list-style-type: none"> <li>• BP – <i>decrease in SBP/ DBP/ HR/ MAP</i></li> <li>• Muscle sympathetic nerve activity – <i>decreased</i></li> </ul>      |  |
| Howden 2015 (49)  | RCT | CKD 3-4 & >1 uncontrolled cardio-vascular risk factor | 72 (E = 36, C = 36) Age 60.2-62.0     | <ul style="list-style-type: none"> <li>• Physical activity</li> </ul>                   | Nurse practitioner, social worker, exercise physiologist, dietician, psychologist, diabetes educator | <ul style="list-style-type: none"> <li>• Print</li> <li>• Face to face</li> </ul>           | <p>“Exercise training and lifestyle intervention”:</p> <ul style="list-style-type: none"> <li>• Standard care AND</li> <li>• Detailed medical/ surgical history taken by nurse practitioner</li> <li>• Education about exercising safely: maintaining hydration, signs/ symptoms of abnormal response to exercise</li> <li>• If diabetic – education on hypoglycemia</li> <li>• Exercise prescription individualized on patient’s comorbid conditions</li> <li>• Goal = 150min/week of moderate</li> </ul> | <p>Physiological measures:</p> <ul style="list-style-type: none"> <li>• METS – <i>improved*</i></li> <li>• 6 minute walk distance – <i>improved*</i></li> <li>• BMI – <i>improved*</i></li> </ul> |  |

## CKD self-management interventions

|                   |     |                                                 |                                              |                                                                                                                                                                                                  |                                                            |                                                                                                                |                                                                                                                                                                                                                                                                                                                                                                                                                                                                                                                                                                                                                                                 |                                                                                                                                                                                                                                                                                                                                                                                                                                                                                                                                                    |  |
|-------------------|-----|-------------------------------------------------|----------------------------------------------|--------------------------------------------------------------------------------------------------------------------------------------------------------------------------------------------------|------------------------------------------------------------|----------------------------------------------------------------------------------------------------------------|-------------------------------------------------------------------------------------------------------------------------------------------------------------------------------------------------------------------------------------------------------------------------------------------------------------------------------------------------------------------------------------------------------------------------------------------------------------------------------------------------------------------------------------------------------------------------------------------------------------------------------------------------|----------------------------------------------------------------------------------------------------------------------------------------------------------------------------------------------------------------------------------------------------------------------------------------------------------------------------------------------------------------------------------------------------------------------------------------------------------------------------------------------------------------------------------------------------|--|
|                   |     |                                                 |                                              |                                                                                                                                                                                                  |                                                            |                                                                                                                | intensity exercise plus resistance training<br><ul style="list-style-type: none"> <li>• 8 weeks supervised, then 10 month home based</li> <li>• Patients got: exercise ball, resistance training booklet</li> <li>• Patients contacted regularly to monitor adherence to training</li> </ul> <i>Duration: 12 months</i><br><i>Comparator: standard care</i>                                                                                                                                                                                                                                                                                     |                                                                                                                                                                                                                                                                                                                                                                                                                                                                                                                                                    |  |
| Leehey 2016 (50)  | RCT | CKD 2-4 + DM2 + BMI>30 + persistent proteinuria | 36 (Exercise + diet = 18, Diet = 18) Age: 66 | <ul style="list-style-type: none"> <li>• Diet/nutrition</li> <li>• Physical activity</li> </ul>                                                                                                  | Personal trainer                                           | <ul style="list-style-type: none"> <li>• Face to face</li> <li>• Telephone</li> </ul>                          | <p>“Structured exercise program”:</p> <ul style="list-style-type: none"> <li>• Dietary counseling = baseline nutritional counseling with 9 follow-up phone calls (both groups) AND</li> <li>• Supervised exercise program 3x.week (60 min cardio plus 25-30 min resistance training)</li> <li>• Followed by home exercise phase: 3x/week x 60 min with weekly follow-up phone calls &amp; patient encouraged to meet trainer Q1 month</li> </ul> <i>Duration: 12 months</i><br><i>Comparator: diet counseling only</i>                                                                                                                          | <p>Physiological measures:</p> <ul style="list-style-type: none"> <li>• Urine protein to creatinine ratio – <i>no change at 52 weeks</i></li> <li>• Symptom limited and constant work rate treadmill time – <i>significant increase in diet + exercise group at 12 but not 52 weeks</i></li> <li>• Urine albumin to creatinine ratio – <i>no change</i></li> <li>• eGFR – <i>no change</i></li> <li>• Inflammation – <i>no change</i></li> <li>• Endothelial function – <i>no change</i></li> <li>• Body composition – <i>no change</i></li> </ul> |  |
| Montoya 2016 (30) | RCT | CKD 4                                           | 30 (E = 16, C = 14) Age: 67.9-68.3           | <ul style="list-style-type: none"> <li>• General CKD knowledge</li> <li>• Diet/nutrition</li> <li>• Medication</li> <li>• Modalities</li> <li>• Other (i.e. putting affairs in order)</li> </ul> | Nephrologist, nurse practitioner, dietician, social worker | <ul style="list-style-type: none"> <li>• Print</li> <li>• Face to face</li> <li>• PowerPoint slides</li> </ul> | <p>“Nurse practitioner facilitated CKD group visit”:</p> <ul style="list-style-type: none"> <li>• Binder with section on individual labs, another section for topics of groups visits</li> <li>• Six 1.5-2 hour long monthly group visits of 8 patients (~1/2 had family members with them)</li> <li>• 3 visits done in conjunction with nephrologist’s examinations (1<sup>st</sup> half = apt, 2<sup>nd</sup> half = education)</li> <li>• 3 visits = education only</li> <li>• Interactive discussion at each visit</li> <li>• Slide presentation (30 – 45 minutes)</li> </ul> <i>Duration: 9 months</i><br><i>Comparator: standard care</i> | <p>Cognitions:</p> <ul style="list-style-type: none"> <li>• CKD knowledge – <i>improved in both groups</i></li> <li>• Self-efficacy/disease SM – <i>upward trend in E group</i></li> </ul>                                                                                                                                                                                                                                                                                                                                                         |  |
| <b>Non-RCT</b>    |     |                                                 |                                              |                                                                                                                                                                                                  |                                                            |                                                                                                                |                                                                                                                                                                                                                                                                                                                                                                                                                                                                                                                                                                                                                                                 |                                                                                                                                                                                                                                                                                                                                                                                                                                                                                                                                                    |  |

CKD self-management interventions

|                                                                            |                                        |     |          |                                         |                                                                                                                                                                                                                                                 |                                                              |                                                                                                                |                                                                                                                                                                                                                                                                                                                                         |                                                                                                                                                                                                              |  |
|----------------------------------------------------------------------------|----------------------------------------|-----|----------|-----------------------------------------|-------------------------------------------------------------------------------------------------------------------------------------------------------------------------------------------------------------------------------------------------|--------------------------------------------------------------|----------------------------------------------------------------------------------------------------------------|-----------------------------------------------------------------------------------------------------------------------------------------------------------------------------------------------------------------------------------------------------------------------------------------------------------------------------------------|--------------------------------------------------------------------------------------------------------------------------------------------------------------------------------------------------------------|--|
| 1<br>2<br>3<br>4<br>5<br>6<br>7<br>8<br>9<br>10<br>11<br>12<br>13<br>14    | Robinson<br>1988<br>(51)               | Obs | CKD      | 25<br>Age: NR                           | <ul style="list-style-type: none"> <li>• General CKD knowledge</li> <li>• Diet/nutrition</li> <li>• Medication</li> <li>• Other (i.e. self-care activities)</li> <li>• Modalities</li> </ul>                                                    | NR                                                           | <ul style="list-style-type: none"> <li>• Face to face</li> </ul>                                               | <p>“Renal Bingo”:</p> <ul style="list-style-type: none"> <li>• Bingo game format/ group gaming technique</li> <li>• Provision of refreshments &amp; prizes for motivation</li> <li>• Refreshments made with dietician consultation, reinforced dietary regimen</li> </ul> <p>Duration: one session<br/>Comparator: none</p>             | <p>Cognitions:</p> <ul style="list-style-type: none"> <li>• Information was gained or reinforced – <i>desirable outcome</i></li> <li>• Met a variety of learning needs – <i>desirable outcome</i></li> </ul> |  |
| 15<br>16<br>17<br>18<br>19<br>20<br>21<br>22<br>23<br>24                   | Klang<br>1998<br>(52)                  | QE  | CKD 4-5  | 56<br>(E = 28,<br>C = 28)<br>Age: 54-58 | <ul style="list-style-type: none"> <li>• General CKD knowledge</li> <li>• Diet/nutrition</li> <li>• Physical activity</li> <li>• Modalities</li> <li>• Other (i.e. psychosocial - impact of CKD on economy, family, and social life)</li> </ul> | Nurse, physician, social worker, dietician, physio-therapist | <ul style="list-style-type: none"> <li>• Face to face</li> </ul>                                               | <p>“Pre-dialysis patient education”:</p> <ul style="list-style-type: none"> <li>• Four 2-hour sessions of group teaching with a classroom approach</li> <li>• Individual support follow-up by nephrology team member</li> </ul> <p>Duration: 4 sessions<br/>Comparator: standard care</p>                                               | <p>Individual outcomes:</p> <ul style="list-style-type: none"> <li>• Functional and emotional wellbeing – <i>better in E group*</i></li> </ul>                                                               |  |
| 25<br>26<br>27<br>28<br>29<br>30<br>31<br>32<br>33<br>34<br>35<br>36<br>37 | Cupisiti<br>2002<br>(53)               | PP  | CKD 3b-5 | 20<br>Age: NR                           | <ul style="list-style-type: none"> <li>• Diet/nutrition</li> </ul>                                                                                                                                                                              | NR                                                           | <ul style="list-style-type: none"> <li>• Print</li> </ul>                                                      | <p>“Vegetarian diet”:</p> <ul style="list-style-type: none"> <li>• Alternate between animal based conventional low protein diet &amp; a vegetable based low protein diet</li> <li>• Booklets explaining general guidelines &amp; features of the diet</li> </ul> <p>Duration: one session<br/>Comparator: conventional protein diet</p> | <p>Individual outcomes:</p> <ul style="list-style-type: none"> <li>• Opinions on diet – <i>90% enjoyed</i></li> </ul>                                                                                        |  |
| 38<br>39<br>40<br>41<br>42                                                 | Gutierrez<br>Vilaplana<br>2007<br>(57) | PP  | CKD      | 24<br>Age: 64.5                         | <ul style="list-style-type: none"> <li>• General CKD knowledge</li> <li>• Diet/nutrition</li> <li>• Modalities</li> </ul>                                                                                                                       | Nurse, patient volunteers                                    | <ul style="list-style-type: none"> <li>• Print</li> <li>• Face to face</li> <li>• PowerPoint slides</li> </ul> | <p>“Education Intervention”</p> <ul style="list-style-type: none"> <li>• 8 2-hour classes</li> <li>• Didactic and discussion</li> </ul> <p>Duration: 6 months</p>                                                                                                                                                                       | <p>Cognitions:</p> <ul style="list-style-type: none"> <li>• Improvement in knowledge of CKD</li> </ul>                                                                                                       |  |

## CKD self-management interventions

|                  |     |       |                 |                                                                                    |                                               |                                          |                                                                                                                                                                                                                                                                                                                                                                                              |                                                                                                               |   |
|------------------|-----|-------|-----------------|------------------------------------------------------------------------------------|-----------------------------------------------|------------------------------------------|----------------------------------------------------------------------------------------------------------------------------------------------------------------------------------------------------------------------------------------------------------------------------------------------------------------------------------------------------------------------------------------------|---------------------------------------------------------------------------------------------------------------|---|
|                  |     |       |                 | • Other                                                                            |                                               |                                          | <i>Comparator: none</i>                                                                                                                                                                                                                                                                                                                                                                      |                                                                                                               |   |
|                  |     |       |                 |                                                                                    |                                               |                                          |                                                                                                                                                                                                                                                                                                                                                                                              | Behaviors:                                                                                                    |   |
|                  |     |       |                 |                                                                                    |                                               |                                          |                                                                                                                                                                                                                                                                                                                                                                                              | • Modified lifestyle, diet                                                                                    | ● |
|                  |     |       |                 |                                                                                    |                                               |                                          |                                                                                                                                                                                                                                                                                                                                                                                              | Intervention specific:                                                                                        |   |
|                  |     |       |                 |                                                                                    |                                               |                                          |                                                                                                                                                                                                                                                                                                                                                                                              | • Reduction of stress, fear                                                                                   | ● |
|                  |     |       |                 |                                                                                    |                                               |                                          |                                                                                                                                                                                                                                                                                                                                                                                              | • Improvement in therapeutic relationships with healthcare providers, companions and multi-disciplinary team. | ● |
| Pagels 2008 (55) | Obs | CKD   | 58<br>Age: 65   | • General CKD knowledge                                                            | Nurse                                         | • Print                                  | • A diary to promote disease related knowledge, involvement and self-care ability and to promote cooperation between patient and nurse<br><i>Duration: 12 months</i><br><i>Comparator: none</i>                                                                                                                                                                                              | Cognitions:                                                                                                   | ● |
|                  |     |       |                 |                                                                                    |                                               |                                          |                                                                                                                                                                                                                                                                                                                                                                                              | • Participation, self-care, and disease related knowledge                                                     | ● |
|                  |     |       |                 |                                                                                    |                                               |                                          |                                                                                                                                                                                                                                                                                                                                                                                              | Intervention specific:                                                                                        |   |
|                  |     |       |                 |                                                                                    |                                               |                                          |                                                                                                                                                                                                                                                                                                                                                                                              | • Use of diary                                                                                                | ● |
|                  |     |       |                 |                                                                                    |                                               |                                          |                                                                                                                                                                                                                                                                                                                                                                                              | • Suitability for teaching purposes                                                                           | ● |
| Yen 2008 (61)    | PP  | CKD 3 | 66<br>Age: 67.4 | • General CKD knowledge<br>• Diet/nutrition<br>• Physical activity<br>• Medication | Nephrologist, nurse, dietician, social worker | • Print<br>• Face to face<br>• Telephone | “Educational intervention”:<br>• Handouts<br>• One 150 min workshop<br>• Individual consults Q6 month with nurse<br>• Phone number provided to participants for questions<br>• Desserts recommended by dietician given at workshop for educational purposes, lunch boxes designed by dietician given out at the end of the workshop<br><i>Duration: 12 months</i><br><i>Comparator: None</i> | Cognitions:                                                                                                   | ● |
|                  |     |       |                 |                                                                                    |                                               |                                          |                                                                                                                                                                                                                                                                                                                                                                                              | • QOL (WHOQOL-BREF Taiwan version) – <i>global increase</i>                                                   | ● |
|                  |     |       |                 |                                                                                    |                                               |                                          |                                                                                                                                                                                                                                                                                                                                                                                              | • Knowledge of renal function protection (checklist made by investigators) – <i>no change</i>                 | ● |
|                  |     |       |                 |                                                                                    |                                               |                                          |                                                                                                                                                                                                                                                                                                                                                                                              | Physiological measures:                                                                                       | ● |
|                  |     |       |                 |                                                                                    |                                               |                                          |                                                                                                                                                                                                                                                                                                                                                                                              | • Creatinine – <i>no change</i>                                                                               | ● |
|                  |     |       |                 |                                                                                    |                                               |                                          |                                                                                                                                                                                                                                                                                                                                                                                              | • BUN – <i>no change</i>                                                                                      | ● |
|                  |     |       |                 |                                                                                    |                                               |                                          |                                                                                                                                                                                                                                                                                                                                                                                              | • GFR – <i>no change</i>                                                                                      | ● |
|                  |     |       |                 |                                                                                    |                                               |                                          |                                                                                                                                                                                                                                                                                                                                                                                              | • Body weight – <i>no change</i>                                                                              | ● |
|                  |     |       |                 |                                                                                    |                                               |                                          |                                                                                                                                                                                                                                                                                                                                                                                              | • Muscle weight – <i>no change</i>                                                                            | ● |
|                  |     |       |                 |                                                                                    |                                               |                                          |                                                                                                                                                                                                                                                                                                                                                                                              | • % Body fat – <i>no change</i>                                                                               | ● |
|                  |     |       |                 |                                                                                    |                                               |                                          |                                                                                                                                                                                                                                                                                                                                                                                              | • Waist to hip ratio – <i>significant decrease in E group</i>                                                 | ● |
|                  |     |       |                 |                                                                                    |                                               |                                          |                                                                                                                                                                                                                                                                                                                                                                                              | • BMI – <i>significant decrease in E group</i>                                                                | ● |
|                  |     |       |                 |                                                                                    |                                               |                                          |                                                                                                                                                                                                                                                                                                                                                                                              | • BP – <i>no change</i>                                                                                       | ● |



CKD self-management interventions

|                                                                   |                               |     |         |                                             |                                                                                                                                                                                                                                           |                                                                                                           |                                                                                   |                                                                                                                                                                                                                                                                                                                                                                                                                                                                                             |                                                                                                                                                                                                                       |                                                                                       |
|-------------------------------------------------------------------|-------------------------------|-----|---------|---------------------------------------------|-------------------------------------------------------------------------------------------------------------------------------------------------------------------------------------------------------------------------------------------|-----------------------------------------------------------------------------------------------------------|-----------------------------------------------------------------------------------|---------------------------------------------------------------------------------------------------------------------------------------------------------------------------------------------------------------------------------------------------------------------------------------------------------------------------------------------------------------------------------------------------------------------------------------------------------------------------------------------|-----------------------------------------------------------------------------------------------------------------------------------------------------------------------------------------------------------------------|---------------------------------------------------------------------------------------|
| 1<br>2<br>3<br>4<br>5<br>6<br>7<br>8<br>9<br>10<br>11<br>12<br>13 | Gutierrez Vilaplana 2009 (54) | PP  | CKD 4-5 | 41<br>Age: 60.56                            | <ul style="list-style-type: none"> <li>• General CKD knowledge</li> <li>• Diet/nutrition</li> <li>• Physical activity</li> <li>• Modalities</li> <li>• Other (i.e. psychosocial - impact of CKD family, finances, social life)</li> </ul> | Nurse, physician, technician, 3 expert patients                                                           | <ul style="list-style-type: none"> <li>• Print</li> <li>• Face to face</li> </ul> | <p>“Teaching group”:</p> <ul style="list-style-type: none"> <li>• Six 2-hour monthly group education sessions</li> <li>• Booklet for future reference</li> </ul> <p><i>Duration:</i> 6 months<br/><i>Comparator:</i> None</p>                                                                                                                                                                                                                                                               | <p>Cognitions:</p> <ul style="list-style-type: none"> <li>• Anxiety – <i>decreased</i></li> <li>• Fear – <i>more control of fear response</i></li> <li>• Stress – <i>decreased</i></li> </ul>                         |    |
| 14<br>15<br>16<br>17<br>18<br>19<br>20                            | Wu 2009 (58)                  | QE  | CKD 3-5 | 573<br>(E = 287, Cohort = 286)<br>Age: 63.4 | <ul style="list-style-type: none"> <li>• General CKD knowledge</li> <li>• Diet/nutrition</li> <li>• Medication</li> <li>• Lifestyle</li> </ul>                                                                                            | Nurse, social worker, dietician, HD/PD patient volunteers, physicians                                     | <ul style="list-style-type: none"> <li>• Face to face</li> </ul>                  | <p>“Multidisciplinary pre-dialysis education (MPE)”:</p> <ul style="list-style-type: none"> <li>• Individual lectures, content based on CKD stage</li> <li>• Dietary counseling biannually</li> </ul> <p><i>Duration:</i> 12 months<br/><i>Comparator:</i> standard care</p>                                                                                                                                                                                                                | <p>Health status:</p> <ul style="list-style-type: none"> <li>• ESRD warranting RRT – <i>13.9% in E group vs 43% in C group</i></li> <li>• All cause mortality – <i>1.7% in E group vs 10.1% in C group</i></li> </ul> |    |
| 21<br>22<br>23<br>24<br>25<br>26<br>27<br>28<br>29<br>30<br>31    | Wierdsma 2011 (59)            | QE  | CKD     | 54<br>(E = 28, C = 26)<br>Age: 55-59        | <ul style="list-style-type: none"> <li>• Medication</li> </ul>                                                                                                                                                                            | Nurse practitioner                                                                                        | <ul style="list-style-type: none"> <li>• Face to face</li> <li>• Print</li> </ul> | <p>“Motivational interviewing”:</p> <ul style="list-style-type: none"> <li>• Counseling by nurse practitioner (in addition to care by nephrologist) using motivational interviewing</li> <li>• Using the “Long-Term Medication Behavior Self-Efficacy Scale (LTMBSES)” – areas with score &lt;5 were identified and then up to 5 areas (picked by patient) were discussed and solutions and goals were set</li> </ul> <p><i>Duration:</i> 6 months<br/><i>Comparator:</i> standard care</p> | <p>Cognitions:</p> <ul style="list-style-type: none"> <li>• LTMBSES – <i>difference in mean self-efficacy score at post-test</i></li> </ul>                                                                           |    |
| 32<br>33<br>34<br>35<br>36<br>37<br>38<br>39<br>40                | Aguilera Florez 2012 (60)     | Obs | CKD     | 19<br>Age: 58                               | <ul style="list-style-type: none"> <li>• General CKD knowledge</li> <li>• Diet/nutrition</li> <li>• Medication</li> <li>• Symptom management</li> <li>• Physical activity</li> <li>• Modalities</li> <li>• Other</li> </ul>               | Nurse, physio-therapist, dietician, pharmacist, psychologist, coordinators, nephrologist, patient mentors | <ul style="list-style-type: none"> <li>• Face to face</li> </ul>                  | <p>“Escuela ERCA”:</p> <ul style="list-style-type: none"> <li>• 7 1.5-hour multi-disciplinary group education sessions held biweekly</li> <li>• Up to 10 patients per group with family members</li> <li>• Didactic plus discussion format</li> </ul> <p><i>Duration:</i> Not reported<br/><i>Comparator:</i> None</p>                                                                                                                                                                      | <p>Cognitions:</p> <ul style="list-style-type: none"> <li>• Knowledge</li> <li>• Anxiety - <i>increased</i></li> </ul>                                                                                                |  |
|                                                                   |                               |     |         |                                             |                                                                                                                                                                                                                                           |                                                                                                           |                                                                                   |                                                                                                                                                                                                                                                                                                                                                                                                                                                                                             | <p>Individual outcomes:</p> <ul style="list-style-type: none"> <li>• Satisfaction in group therapy</li> </ul>                                                                                                         |  |

CKD self-management interventions

|    |                             |    |         |                                                      |                                                                                                                                                                                        |                             |                                                                                                        |                                                                                                                                                                                                                                                                                                                                                                                                                                                                                                                                                                    |                                                                                                                                                                                                                                                                                            |  |
|----|-----------------------------|----|---------|------------------------------------------------------|----------------------------------------------------------------------------------------------------------------------------------------------------------------------------------------|-----------------------------|--------------------------------------------------------------------------------------------------------|--------------------------------------------------------------------------------------------------------------------------------------------------------------------------------------------------------------------------------------------------------------------------------------------------------------------------------------------------------------------------------------------------------------------------------------------------------------------------------------------------------------------------------------------------------------------|--------------------------------------------------------------------------------------------------------------------------------------------------------------------------------------------------------------------------------------------------------------------------------------------|--|
| 1  |                             |    |         |                                                      |                                                                                                                                                                                        |                             |                                                                                                        |                                                                                                                                                                                                                                                                                                                                                                                                                                                                                                                                                                    |                                                                                                                                                                                                                                                                                            |  |
| 2  |                             |    |         |                                                      |                                                                                                                                                                                        |                             |                                                                                                        |                                                                                                                                                                                                                                                                                                                                                                                                                                                                                                                                                                    |                                                                                                                                                                                                                                                                                            |  |
| 3  | Choi<br>2012<br>(61)        | QE | CKD 1-5 | 61<br>(E = 31,<br>C = 30)<br>Age:<br>53.93-<br>58.33 | <ul style="list-style-type: none"> <li>• General CKD knowledge</li> <li>• Diet/nutrition</li> <li>• Modalities</li> <li>• Other (i.e. understanding and compliance with SM)</li> </ul> | Physician, nurse, dietician | <ul style="list-style-type: none"> <li>• Face to face</li> <li>• PowerPoint slides</li> </ul>          | <p>“Face-to-face SM program”:</p> <ul style="list-style-type: none"> <li>• 90 minute lecture with slides (3 – 5 people/group)</li> <li>• 20 minute individual consult</li> <li>• 1 week later individual reinforcement education and consultation</li> </ul> <p>Duration: 2 sessions<br/>Comparator: general maintenance</p>                                                                                                                                                                                                                                       | <p>Cognitions:</p> <ul style="list-style-type: none"> <li>• Knowledge of CKD scale – increase &gt; in E group</li> </ul>                                                                                                                                                                   |  |
| 4  |                             |    |         |                                                      |                                                                                                                                                                                        |                             |                                                                                                        |                                                                                                                                                                                                                                                                                                                                                                                                                                                                                                                                                                    | Behaviors:                                                                                                                                                                                                                                                                                 |  |
| 5  |                             |    |         |                                                      |                                                                                                                                                                                        |                             |                                                                                                        |                                                                                                                                                                                                                                                                                                                                                                                                                                                                                                                                                                    | <ul style="list-style-type: none"> <li>• Self-care practice scale for CKD patients – no difference between E group and C group but did increase over time for both groups</li> </ul>                                                                                                       |  |
| 6  |                             |    |         |                                                      |                                                                                                                                                                                        |                             |                                                                                                        |                                                                                                                                                                                                                                                                                                                                                                                                                                                                                                                                                                    | Physiological measures:                                                                                                                                                                                                                                                                    |  |
| 7  |                             |    |         |                                                      |                                                                                                                                                                                        |                             |                                                                                                        |                                                                                                                                                                                                                                                                                                                                                                                                                                                                                                                                                                    | <ul style="list-style-type: none"> <li>• BUN/Creatinine – no change</li> <li>• Na/K – no change</li> <li>• Ca/PO4 – no change</li> <li>• Hemoglobin – no change</li> <li>• GFR – no change</li> </ul>                                                                                      |  |
| 8  |                             |    |         |                                                      |                                                                                                                                                                                        |                             |                                                                                                        |                                                                                                                                                                                                                                                                                                                                                                                                                                                                                                                                                                    |                                                                                                                                                                                                                                                                                            |  |
| 9  |                             |    |         |                                                      |                                                                                                                                                                                        |                             |                                                                                                        |                                                                                                                                                                                                                                                                                                                                                                                                                                                                                                                                                                    |                                                                                                                                                                                                                                                                                            |  |
| 10 |                             |    |         |                                                      |                                                                                                                                                                                        |                             |                                                                                                        |                                                                                                                                                                                                                                                                                                                                                                                                                                                                                                                                                                    |                                                                                                                                                                                                                                                                                            |  |
| 11 |                             |    |         |                                                      |                                                                                                                                                                                        |                             |                                                                                                        |                                                                                                                                                                                                                                                                                                                                                                                                                                                                                                                                                                    |                                                                                                                                                                                                                                                                                            |  |
| 12 |                             |    |         |                                                      |                                                                                                                                                                                        |                             |                                                                                                        |                                                                                                                                                                                                                                                                                                                                                                                                                                                                                                                                                                    |                                                                                                                                                                                                                                                                                            |  |
| 13 |                             |    |         |                                                      |                                                                                                                                                                                        |                             |                                                                                                        |                                                                                                                                                                                                                                                                                                                                                                                                                                                                                                                                                                    |                                                                                                                                                                                                                                                                                            |  |
| 14 |                             |    |         |                                                      |                                                                                                                                                                                        |                             |                                                                                                        |                                                                                                                                                                                                                                                                                                                                                                                                                                                                                                                                                                    |                                                                                                                                                                                                                                                                                            |  |
| 15 |                             |    |         |                                                      |                                                                                                                                                                                        |                             |                                                                                                        |                                                                                                                                                                                                                                                                                                                                                                                                                                                                                                                                                                    |                                                                                                                                                                                                                                                                                            |  |
| 16 | Kao<br>2012<br>(27)         | QE | CKD 1-4 | 94<br>(E = 45,<br>C = 49)<br>Age: 73.17              | <ul style="list-style-type: none"> <li>• General CKD knowledge</li> <li>• Physical activity</li> </ul>                                                                                 | Instructor                  | <ul style="list-style-type: none"> <li>• Print</li> <li>• Face to face</li> <li>• Telephone</li> </ul> | <p>“Exercise education intervention”:</p> <ul style="list-style-type: none"> <li>• Manual</li> <li>• 1.5 hour exercise/ health education course</li> <li>• Drafted exercise contract &amp; exercise programs</li> <li>• Follow up phone calls</li> <li>• 1x/month for patients in maintenance phase</li> <li>• 2x/month for patients in action/ prep stages</li> <li>• 4x/month for patients at pre-contemplation/ contemplation stages</li> <li>• Goal: workout 3-5x/week x 30min for 3 months</li> </ul> <p>Duration: 4 months<br/>Comparator: standard care</p> | Behaviors:                                                                                                                                                                                                                                                                                 |  |
| 17 |                             |    |         |                                                      |                                                                                                                                                                                        |                             |                                                                                                        |                                                                                                                                                                                                                                                                                                                                                                                                                                                                                                                                                                    | <ul style="list-style-type: none"> <li>• Exercise behavior – improved in E group</li> </ul>                                                                                                                                                                                                |  |
| 18 |                             |    |         |                                                      |                                                                                                                                                                                        |                             |                                                                                                        |                                                                                                                                                                                                                                                                                                                                                                                                                                                                                                                                                                    | Cognitions:                                                                                                                                                                                                                                                                                |  |
| 19 |                             |    |         |                                                      |                                                                                                                                                                                        |                             |                                                                                                        |                                                                                                                                                                                                                                                                                                                                                                                                                                                                                                                                                                    | <ul style="list-style-type: none"> <li>• Depression – score decreased (i.e. improved) in E group</li> </ul>                                                                                                                                                                                |  |
| 20 |                             |    |         |                                                      |                                                                                                                                                                                        |                             |                                                                                                        |                                                                                                                                                                                                                                                                                                                                                                                                                                                                                                                                                                    | Symptom management:                                                                                                                                                                                                                                                                        |  |
| 21 |                             |    |         |                                                      |                                                                                                                                                                                        |                             |                                                                                                        |                                                                                                                                                                                                                                                                                                                                                                                                                                                                                                                                                                    | <ul style="list-style-type: none"> <li>• Fatigue - score decreased in E group</li> </ul>                                                                                                                                                                                                   |  |
| 22 |                             |    |         |                                                      |                                                                                                                                                                                        |                             |                                                                                                        |                                                                                                                                                                                                                                                                                                                                                                                                                                                                                                                                                                    |                                                                                                                                                                                                                                                                                            |  |
| 23 |                             |    |         |                                                      |                                                                                                                                                                                        |                             |                                                                                                        |                                                                                                                                                                                                                                                                                                                                                                                                                                                                                                                                                                    |                                                                                                                                                                                                                                                                                            |  |
| 24 |                             |    |         |                                                      |                                                                                                                                                                                        |                             |                                                                                                        |                                                                                                                                                                                                                                                                                                                                                                                                                                                                                                                                                                    |                                                                                                                                                                                                                                                                                            |  |
| 25 |                             |    |         |                                                      |                                                                                                                                                                                        |                             |                                                                                                        |                                                                                                                                                                                                                                                                                                                                                                                                                                                                                                                                                                    |                                                                                                                                                                                                                                                                                            |  |
| 26 |                             |    |         |                                                      |                                                                                                                                                                                        |                             |                                                                                                        |                                                                                                                                                                                                                                                                                                                                                                                                                                                                                                                                                                    |                                                                                                                                                                                                                                                                                            |  |
| 27 |                             |    |         |                                                      |                                                                                                                                                                                        |                             |                                                                                                        |                                                                                                                                                                                                                                                                                                                                                                                                                                                                                                                                                                    |                                                                                                                                                                                                                                                                                            |  |
| 28 |                             |    |         |                                                      |                                                                                                                                                                                        |                             |                                                                                                        |                                                                                                                                                                                                                                                                                                                                                                                                                                                                                                                                                                    |                                                                                                                                                                                                                                                                                            |  |
| 29 |                             |    |         |                                                      |                                                                                                                                                                                        |                             |                                                                                                        |                                                                                                                                                                                                                                                                                                                                                                                                                                                                                                                                                                    |                                                                                                                                                                                                                                                                                            |  |
| 30 |                             |    |         |                                                      |                                                                                                                                                                                        |                             |                                                                                                        |                                                                                                                                                                                                                                                                                                                                                                                                                                                                                                                                                                    |                                                                                                                                                                                                                                                                                            |  |
| 31 |                             |    |         |                                                      |                                                                                                                                                                                        |                             |                                                                                                        |                                                                                                                                                                                                                                                                                                                                                                                                                                                                                                                                                                    |                                                                                                                                                                                                                                                                                            |  |
| 32 |                             |    |         |                                                      |                                                                                                                                                                                        |                             |                                                                                                        |                                                                                                                                                                                                                                                                                                                                                                                                                                                                                                                                                                    |                                                                                                                                                                                                                                                                                            |  |
| 33 |                             |    |         |                                                      |                                                                                                                                                                                        |                             |                                                                                                        |                                                                                                                                                                                                                                                                                                                                                                                                                                                                                                                                                                    |                                                                                                                                                                                                                                                                                            |  |
| 34 |                             |    |         |                                                      |                                                                                                                                                                                        |                             |                                                                                                        |                                                                                                                                                                                                                                                                                                                                                                                                                                                                                                                                                                    |                                                                                                                                                                                                                                                                                            |  |
| 35 | Diamantidis<br>2013<br>(62) | PP | CKD 3-5 | 108<br>Age: 64                                       | <ul style="list-style-type: none"> <li>• Diet/nutrition</li> <li>• Medication</li> </ul>                                                                                               | Online tool                 | <ul style="list-style-type: none"> <li>• Website</li> </ul>                                            | <p>“Disease-specific safety information”:</p> <ul style="list-style-type: none"> <li>• Safe kidney care website – patient/family member and provider portals</li> <li>• Education modules displayed in circular distribution to avoid prioritization of topics</li> </ul> <p>Duration: Not applicable</p>                                                                                                                                                                                                                                                          | Intervention specific:                                                                                                                                                                                                                                                                     |  |
| 36 |                             |    |         |                                                      |                                                                                                                                                                                        |                             |                                                                                                        |                                                                                                                                                                                                                                                                                                                                                                                                                                                                                                                                                                    | <ul style="list-style-type: none"> <li>• First entry into website - &lt;30% of participants entered within 365 days (total follow up period)</li> <li>• Average dwell time on the website – 7 minutes</li> <li>• Modules were ranked by frequency of selection - The three most</li> </ul> |  |
| 37 |                             |    |         |                                                      |                                                                                                                                                                                        |                             |                                                                                                        |                                                                                                                                                                                                                                                                                                                                                                                                                                                                                                                                                                    |                                                                                                                                                                                                                                                                                            |  |
| 38 |                             |    |         |                                                      |                                                                                                                                                                                        |                             |                                                                                                        |                                                                                                                                                                                                                                                                                                                                                                                                                                                                                                                                                                    |                                                                                                                                                                                                                                                                                            |  |
| 39 |                             |    |         |                                                      |                                                                                                                                                                                        |                             |                                                                                                        |                                                                                                                                                                                                                                                                                                                                                                                                                                                                                                                                                                    |                                                                                                                                                                                                                                                                                            |  |
| 40 |                             |    |         |                                                      |                                                                                                                                                                                        |                             |                                                                                                        |                                                                                                                                                                                                                                                                                                                                                                                                                                                                                                                                                                    |                                                                                                                                                                                                                                                                                            |  |
| 41 |                             |    |         |                                                      |                                                                                                                                                                                        |                             |                                                                                                        |                                                                                                                                                                                                                                                                                                                                                                                                                                                                                                                                                                    |                                                                                                                                                                                                                                                                                            |  |
| 42 |                             |    |         |                                                      |                                                                                                                                                                                        |                             |                                                                                                        |                                                                                                                                                                                                                                                                                                                                                                                                                                                                                                                                                                    |                                                                                                                                                                                                                                                                                            |  |
| 43 |                             |    |         |                                                      |                                                                                                                                                                                        |                             |                                                                                                        |                                                                                                                                                                                                                                                                                                                                                                                                                                                                                                                                                                    |                                                                                                                                                                                                                                                                                            |  |
| 44 |                             |    |         |                                                      |                                                                                                                                                                                        |                             |                                                                                                        |                                                                                                                                                                                                                                                                                                                                                                                                                                                                                                                                                                    |                                                                                                                                                                                                                                                                                            |  |
| 45 |                             |    |         |                                                      |                                                                                                                                                                                        |                             |                                                                                                        |                                                                                                                                                                                                                                                                                                                                                                                                                                                                                                                                                                    |                                                                                                                                                                                                                                                                                            |  |
| 46 |                             |    |         |                                                      |                                                                                                                                                                                        |                             |                                                                                                        |                                                                                                                                                                                                                                                                                                                                                                                                                                                                                                                                                                    |                                                                                                                                                                                                                                                                                            |  |
| 47 |                             |    |         |                                                      |                                                                                                                                                                                        |                             |                                                                                                        |                                                                                                                                                                                                                                                                                                                                                                                                                                                                                                                                                                    |                                                                                                                                                                                                                                                                                            |  |

CKD self-management interventions

|                  |    |                                |                 |                                                                                                                                                                                                                                                           |             |                                                                                                                 |                                                                                                                                                                                                                                                                                                                                                           |                                                                                                                                                                                                             |  |
|------------------|----|--------------------------------|-----------------|-----------------------------------------------------------------------------------------------------------------------------------------------------------------------------------------------------------------------------------------------------------|-------------|-----------------------------------------------------------------------------------------------------------------|-----------------------------------------------------------------------------------------------------------------------------------------------------------------------------------------------------------------------------------------------------------------------------------------------------------------------------------------------------------|-------------------------------------------------------------------------------------------------------------------------------------------------------------------------------------------------------------|--|
|                  |    |                                |                 |                                                                                                                                                                                                                                                           |             |                                                                                                                 | <i>Comparator: None</i>                                                                                                                                                                                                                                                                                                                                   | <i>frequently visited pages were “Renal function calculator”, “Pills to avoid”, and “Foods to avoid”</i>                                                                                                    |  |
| Kazawa 2013 (31) | PP | CKD 3-4 (diabetic nephropathy) | 30<br>Age: 67   | <ul style="list-style-type: none"> <li>Diet/nutrition</li> <li>Medications</li> <li>Physical activity</li> <li>Comorbidities</li> <li>Other (i.e. stress management, identify supporters (family) &amp; how they can contribute, goal setting)</li> </ul> | Nurse       | <ul style="list-style-type: none"> <li>Print</li> <li>Face to face</li> <li>Telephone</li> <li>Email</li> </ul> | <p>“SM skills program”:</p> <ul style="list-style-type: none"> <li>Textbook</li> <li>Daily journal</li> <li>Four 1-hour face-to-face sessions Q2 weeks at outpatient clinic or in home</li> <li>Two 30 minute phone or email sessions Q1 month</li> <li>Then Q1 month phone calls</li> </ul> <p><i>Duration: 6 months</i><br/><i>Comparator: None</i></p> | <p>Individual outcomes:</p> <ul style="list-style-type: none"> <li>QOL – <i>self-efficacy and SM behaviors improved</i></li> </ul>                                                                          |  |
|                  |    |                                |                 |                                                                                                                                                                                                                                                           |             |                                                                                                                 |                                                                                                                                                                                                                                                                                                                                                           | <p>Physiological measures:</p> <ul style="list-style-type: none"> <li>Renal function – <i>no change</i></li> <li>Hemoglobin A1c – <i>decreased post intervention</i></li> </ul>                             |  |
| Lin 2013 (63)    | PP | CKD 1-3a                       | 37<br>Age 67.42 | <ul style="list-style-type: none"> <li>Other (i.e. self-regulation/ self-management topics)</li> </ul>                                                                                                                                                    | Nurse       | <ul style="list-style-type: none"> <li>Print</li> <li>Face to face</li> <li>Video</li> </ul>                    | <p>“SM program”:</p> <ul style="list-style-type: none"> <li>Self-monitoring workbook</li> <li>5 week SM program</li> <li>Weekly 90 minute face- to-face group sessions (6-8 patients)</li> <li>CKD SM video about self-regulation</li> </ul> <p><i>Duration: 5 weeks</i><br/><i>Comparator: None</i></p>                                                  | <p>Cognitions:</p> <ul style="list-style-type: none"> <li>CKD self-efficacy – <i>increased</i></li> </ul>                                                                                                   |  |
|                  |    |                                |                 |                                                                                                                                                                                                                                                           |             |                                                                                                                 |                                                                                                                                                                                                                                                                                                                                                           | <p>Behaviors:</p> <ul style="list-style-type: none"> <li>CKD SM – <i>no change</i></li> </ul>                                                                                                               |  |
|                  |    |                                |                 |                                                                                                                                                                                                                                                           |             |                                                                                                                 |                                                                                                                                                                                                                                                                                                                                                           | <p>Physiological measures:</p> <ul style="list-style-type: none"> <li>Creatinine – <i>marginally significant decrease</i></li> <li>GFR – <i>remained stable</i></li> </ul>                                  |  |
| Murali 2013 (28) | PP | CKD 4                          | 12<br>Age: 68   | <ul style="list-style-type: none"> <li>Diet/nutrition</li> </ul>                                                                                                                                                                                          | Online tool | <ul style="list-style-type: none"> <li>Website</li> </ul>                                                       | <p>“Dietary assessment and evaluation tool”:</p> <ul style="list-style-type: none"> <li>Self-administered</li> <li>Obtains 24 hour food history</li> <li>Then evaluates diet based on KDOQI GL</li> <li>Then share general tips for success</li> </ul>                                                                                                    | <p>Cognitions:</p> <ul style="list-style-type: none"> <li>Change in patients’ self-efficacy to adhere to KDOQI GL after single exposure to the tool – <i>3 worsened, 3 improved, 6 no change</i></li> </ul> |  |

## CKD self-management interventions

|                        |    |                                                             |                                     |                                                                                                                                                                                        |                           |                                                                                   |                                                                                                                                                                                                                                                                                                                                                                                                                                                                               |                                                                                                                                                                                                                                                                                      |                                                                                       |
|------------------------|----|-------------------------------------------------------------|-------------------------------------|----------------------------------------------------------------------------------------------------------------------------------------------------------------------------------------|---------------------------|-----------------------------------------------------------------------------------|-------------------------------------------------------------------------------------------------------------------------------------------------------------------------------------------------------------------------------------------------------------------------------------------------------------------------------------------------------------------------------------------------------------------------------------------------------------------------------|--------------------------------------------------------------------------------------------------------------------------------------------------------------------------------------------------------------------------------------------------------------------------------------|---------------------------------------------------------------------------------------|
|                        |    |                                                             |                                     |                                                                                                                                                                                        |                           |                                                                                   | <ul style="list-style-type: none"> <li>• A report is generated for the nephrologist to guide discussion with patients</li> </ul> <p><i>Duration:</i> single exposure<br/><i>Comparator:</i> None</p>                                                                                                                                                                                                                                                                          | <p>Intervention specific:</p> <ul style="list-style-type: none"> <li>• Tool acceptability – <i>well accepted</i></li> <li>• Congruence of patient and provider attitudes – <i>incongruence in 4/10 cases where provider states used report but patient doesn't verify</i></li> </ul> |    |
| Nauta 2013 (32)        | PP | CKD                                                         | 22<br>Age: 55.2-59.8                | <ul style="list-style-type: none"> <li>• Diet/nutrition</li> <li>• Physical activity</li> <li>• Lifestyle</li> </ul>                                                                   | Online tool               | <ul style="list-style-type: none"> <li>• Print</li> <li>• Website</li> </ul>      | <p>“Lifestyle management tool”:</p> <ul style="list-style-type: none"> <li>• 33-page quick start guide provided</li> <li>• Patients had access to site for 4 months – patient choice to frequency of visits to website</li> <li>• <i>Duration:</i> 4 months</li> <li>• <i>Comparator:</i> None</li> </ul>                                                                                                                                                                     | <p>Cognitions:</p> <ul style="list-style-type: none"> <li>• Self-efficacy – <i>limited effectiveness</i></li> </ul>                                                                                                                                                                  |    |
|                        |    |                                                             |                                     |                                                                                                                                                                                        |                           |                                                                                   |                                                                                                                                                                                                                                                                                                                                                                                                                                                                               | <p>Behaviors:</p> <ul style="list-style-type: none"> <li>• SM – <i>limited effectiveness</i></li> </ul>                                                                                                                                                                              |    |
| Thomas 2013 (33)       | MM | Diabetic nephropathy (DM + micro-albuminuria)               | 176<br>(E = 116, C = 60)<br>Age: NR | <ul style="list-style-type: none"> <li>• General CKD knowledge</li> <li>• Comorbidities</li> <li>• Lifestyle</li> </ul>                                                                | NR                        | <ul style="list-style-type: none"> <li>• Print</li> <li>• DVD</li> </ul>          | <p>“SM package”:</p> <ul style="list-style-type: none"> <li>• Written materials</li> <li>• 20 minute DVD</li> <li>• Self-monitoring diary</li> <li>• Fridge magnet with key messages</li> <li>• BP monitor if needed</li> </ul> <p><i>Duration:</i> One session<br/><i>Comparator:</i> standard care</p>                                                                                                                                                                      | <p>Physiological measures:</p> <ul style="list-style-type: none"> <li>• BP – <i>no statistically sig difference</i></li> <li>• Hemoglobin A1c – <i>no change</i></li> <li>• BMI – <i>no change</i></li> </ul>                                                                        |    |
| Walker 2013 (64)       | PP | CKD with high risk of progression + DM2 + HTN + albuminuria | 52<br>Age: 57.5                     | <ul style="list-style-type: none"> <li>• Diet/nutrition</li> <li>• Medication</li> <li>• Symptom management</li> <li>• Physical activity</li> <li>• Other (i.e. compliance)</li> </ul> | Nurse, nurse practitioner | <ul style="list-style-type: none"> <li>• Print</li> <li>• Face to face</li> </ul> | <p>“Nurse practitioner intervention in primary care setting”:</p> <ul style="list-style-type: none"> <li>• SM booklet</li> <li>• Initial assessment of lifestyle behaviors, SM practice, health/medication knowledge</li> <li>• Individual education</li> <li>• Individualized patient management plan given at end of 12 weeks</li> <li>• Q2 week 30 minute long assessments &amp; review x 12 weeks</li> </ul> <p><i>Duration:</i> 12 weeks<br/><i>Comparator:</i> None</p> | <p>Behaviors:</p> <ul style="list-style-type: none"> <li>• SM (Partners in Health (PIH) instrument) – <i>had change in certain domains</i></li> </ul>                                                                                                                                |    |
| Wright Nunes 2013 (65) | QE | CKD 1-5                                                     | 556<br>(E = 155, Cohort = 401)      | <ul style="list-style-type: none"> <li>• General CKD knowledge</li> <li>• Diet/nutrition</li> <li>• Medication</li> </ul>                                                              | Nephrology fellows        | <ul style="list-style-type: none"> <li>• Print</li> <li>• Face to face</li> </ul> | <p>“Physician-delivered education too”</p> <ul style="list-style-type: none"> <li>• 1-page intervention worksheet delivered during clinic visits – take 1-2 minutes to administer</li> </ul>                                                                                                                                                                                                                                                                                  | <p>Cognitions:</p> <ul style="list-style-type: none"> <li>• Kidney specific knowledge – <i>associated with increase in knowledge</i></li> </ul>                                                                                                                                      |  |

CKD self-management interventions

|                   |    |                                                             |                                   |                                                                                                                                                                                                   |                                                                     |                                                                                                                     |                                                                                                                                                                                                                                                                                                                            |                                                                                                                                                                                                                                                                                                                             |  |
|-------------------|----|-------------------------------------------------------------|-----------------------------------|---------------------------------------------------------------------------------------------------------------------------------------------------------------------------------------------------|---------------------------------------------------------------------|---------------------------------------------------------------------------------------------------------------------|----------------------------------------------------------------------------------------------------------------------------------------------------------------------------------------------------------------------------------------------------------------------------------------------------------------------------|-----------------------------------------------------------------------------------------------------------------------------------------------------------------------------------------------------------------------------------------------------------------------------------------------------------------------------|--|
|                   |    |                                                             | Age: 57                           | <ul style="list-style-type: none"> <li>Physical activity</li> <li>Lifestyle</li> <li>Comorbidities</li> <li>Other (i.e. compliance)</li> </ul>                                                    |                                                                     |                                                                                                                     | <i>Duration:</i> one session<br><i>Comparator:</i> “historical group” – who developed sheet                                                                                                                                                                                                                                | Intervention specific: <ul style="list-style-type: none"> <li>Feasibility of intervention – <i>physicians found it useful and efficient but had concern regarding some of the talking points</i></li> </ul>                                                                                                                 |  |
| Walker 2014 (24)  | PP | CKD with high risk of progression + DM2 + HTN + albuminuria | 52<br>Age: 57.5                   | <ul style="list-style-type: none"> <li>See Walker (65)</li> </ul>                                                                                                                                 | Nurse, nurse practitioner                                           | <ul style="list-style-type: none"> <li>See Walker (65)</li> </ul>                                                   | <ul style="list-style-type: none"> <li>See Walker (65)</li> </ul>                                                                                                                                                                                                                                                          | Physiological measures: <ul style="list-style-type: none"> <li>Albuminuria – <i>improved</i></li> <li>GFR – <i>no change</i></li> <li>5 year absolute cardiovascular risk – <i>improved</i></li> <li>BP – <i>improved</i></li> <li>Total cholesterol – <i>improved</i></li> <li>Hemoglobin A1c – <i>improved</i></li> </ul> |  |
|                   |    |                                                             |                                   |                                                                                                                                                                                                   |                                                                     |                                                                                                                     |                                                                                                                                                                                                                                                                                                                            | Cognitions: <ul style="list-style-type: none"> <li>Knowledge of medications/ conditions – <i>improved</i></li> </ul>                                                                                                                                                                                                        |  |
|                   |    |                                                             |                                   |                                                                                                                                                                                                   |                                                                     |                                                                                                                     |                                                                                                                                                                                                                                                                                                                            | Behaviors: <ul style="list-style-type: none"> <li>Medication adherence, adherence to healthy lifestyle – <i>improved</i></li> </ul>                                                                                                                                                                                         |  |
| Enworom 2015 (66) | QE | CKD 1-4                                                     | 49<br>(E = 25, C = 24)<br>Age: 73 | <ul style="list-style-type: none"> <li>General CKD knowledge</li> <li>Symptoms management</li> <li>Modalities</li> <li>Comorbidities</li> <li>Other (i.e. advanced care planning)</li> </ul>      | Nurse practitioner, physician assistants, clinical nurse specialist | <ul style="list-style-type: none"> <li>Face to face</li> </ul>                                                      | “Kidney Disease Education (KDE)” <ul style="list-style-type: none"> <li>6 education classes on one on one or group basis</li> </ul> <i>Duration:</i> unclear<br><i>Comparator:</i> no KDE                                                                                                                                  | Physiological measures: <ul style="list-style-type: none"> <li>GFR decline – <i>slower in E group</i></li> <li>Hemoglobin – <i>E group maintained more stable level compared to non-KDE group who lost 1g/dL from baseline</i></li> </ul>                                                                                   |  |
|                   |    |                                                             |                                   |                                                                                                                                                                                                   |                                                                     |                                                                                                                     |                                                                                                                                                                                                                                                                                                                            | Cognitions: <ul style="list-style-type: none"> <li>Kidney disease knowledge (KiKS survey) – <i>no change</i></li> </ul>                                                                                                                                                                                                     |  |
| Vann 2015 (29)    | PP | CKD 3b-4                                                    | 9<br>Age: mean NR                 | <ul style="list-style-type: none"> <li>General CKD knowledge</li> <li>Diet/nutrition</li> <li>Symptom management</li> <li>Modalities</li> <li>Comorbidities</li> <li>Other (i.e. self-</li> </ul> | Nurse practitioner                                                  | <ul style="list-style-type: none"> <li>Print</li> <li>Website</li> <li>Face to face</li> <li>White board</li> </ul> | “CKD Education Program” <ul style="list-style-type: none"> <li>CKD education sessions</li> <li>Assessment of readiness to change</li> <li>CKD toolkit individualized for each participant</li> <li>Collaborative goal setting between nurse practitioner and patient</li> <li>Information booklet with websites</li> </ul> | Cognitions: <ul style="list-style-type: none"> <li>CKD related knowledge – <i>improved</i></li> </ul>                                                                                                                                                                                                                       |  |

CKD self-management interventions

|                          |     |                                                                         |                                   |                                                                                                 |                               |                           |                                                                                                                                                                                                                                                                                                                                                               |                                                                                                                                                                                                                                  |  |
|--------------------------|-----|-------------------------------------------------------------------------|-----------------------------------|-------------------------------------------------------------------------------------------------|-------------------------------|---------------------------|---------------------------------------------------------------------------------------------------------------------------------------------------------------------------------------------------------------------------------------------------------------------------------------------------------------------------------------------------------------|----------------------------------------------------------------------------------------------------------------------------------------------------------------------------------------------------------------------------------|--|
|                          |     |                                                                         |                                   | care management strategies and behaviors)                                                       |                               |                           | listed<br>• Patients met with nurse practitioner for 60 min<br><i>Duration:</i> over 6 visits<br><i>Comparator:</i> none                                                                                                                                                                                                                                      | Behaviors:<br>• Self reported behavior change - <i>improved</i>                                                                                                                                                                  |  |
| Cupisiti 2016 (67)       | Obs | CKD 3b-5                                                                | 823 (E = 305, C = 518) Age: 69-74 | • Diet/nutrition                                                                                | Dietician                     | • Face to face            | “Nutritional Treatment”<br>• Renal dietician assessed dietary habits using 3 day dietary recall & performed an intervention tailored to the needs/clinical features of the patient<br>• Progressed from “normal” diet → low protein diet → very low protein diet depending on needs<br><i>Duration:</i> at least 6 months<br><i>Comparator:</i> standard care | Physiological measures:<br>• Phosphaturia – <i>lower in E group</i>                                                                                                                                                              |  |
|                          |     |                                                                         |                                   |                                                                                                 |                               |                           |                                                                                                                                                                                                                                                                                                                                                               | Health care:<br>• Furosemide use – <i>lower in E group</i><br>• Calcium free phosphate bind use – <i>lower in E group</i><br>• ESA use – <i>lower in E group</i><br>• Active vitamin D preparation use – <i>lower in E group</i> |  |
|                          |     |                                                                         |                                   |                                                                                                 |                               |                           |                                                                                                                                                                                                                                                                                                                                                               | Individual outcomes:<br>• Dietary satisfaction questionnaire – <i>majority of E group patients were satisfied with their diet</i>                                                                                                |  |
| Ong 2016 (68)            | PP  | CKD 4-5                                                                 | 45 Age: 59.4                      | • Medications<br>• Symptom management<br>• Comorbidities<br>• Other (i.e. tracking lab results) | Mobile application            | • Smart phone application | “Smartphone based SM system”<br>• Application generated personalized patient messages based on pre-built algorithms<br><i>Duration:</i> 6 months<br><i>Comparator:</i> none                                                                                                                                                                                   | Physiological measures:<br>• BP – <i>change in home BP readings</i>                                                                                                                                                              |  |
|                          |     |                                                                         |                                   |                                                                                                 |                               |                           |                                                                                                                                                                                                                                                                                                                                                               | Intervention specific:<br>• Medications – <i>127 medication discrepancies identified</i>                                                                                                                                         |  |
| Penaloza-Ramos 2016 (25) | Obs | HTN (BP>130/80) + CKD stage 3 or CVA/TIA or DM or MI or angina, or CABG | NR Age: NA                        | • See McManus (48)                                                                              | General practitioner, patient | • See McManus (48)        | • See McManus (48)                                                                                                                                                                                                                                                                                                                                            | Health care:<br>• Cost effective – <i>yes</i>                                                                                                                                                                                    |  |

Abbreviations: BP – blood pressure; E – experimental; C – control; CHD – coronary heart disease; CHEERS – Controlling Hypertension: Education and Empowerment Renal Study; DM – diabetes mellitus; HTN – hypertension; NR – not reported; RRT – renal replacement therapy; TIA – transient ischemic attack; QOL – quality of life; RCT = randomized controlled trial; QE = quasi-experimental; PP = pre-post intervention; Obs = observational; MM = mixed methods; SM – self-management

CKD self-management interventions

1  
2  
3  
4  
5  
6  
7  
8  
9  
10  
11  
12  
13  
14  
15  
16  
17  
18  
19  
20  
21  
22  
23  
24  
25  
26  
27  
28  
29  
30  
31  
32  
33  
34  
35  
36  
37  
38  
39  
40  
41  
42  
43  
44  
45  
46  
47

Key:

-  Not applicable
-  Outcome improved post intervention
-  Outcome worsened post intervention
-  Outcome unchanged post intervention
-  Outcome had mixed results (some improved and/or some worsened and/or some did not change)

For peer review only

### Description of qualitative study outcomes and results

Table 5 summarizes the findings from six qualitative studies that explored patient perspectives, one of these being a mixed methods study. All studies used semi-structured interviews and one also used a questionnaire. The aims of all these studies were to examine patient perspectives' regarding the self-management interventions they were involved in. Due to the variety of interventions (e.g. intervention topics, delivery mode and providers of the intervention) it was difficult to summarize findings into meaningful categories. Overall, patients highlighted that interventions needed to be individualized and tailored to their specific situations and preferences (e.g. awareness of having CKD, stage of CKD, knowledge of the disease, access to resources, etc.).



## CKD self-management interventions

**Table 5** Summary of qualitative studies

| Study (Reference) | Target population                      | Number of participants | Aim/Intervention                                                                                                                                                                                                                                                    | Methods                                                           | Summary of findings                                                                                                                                                                                                                                                                                                                                                                                                                                                                                                                                                              |
|-------------------|----------------------------------------|------------------------|---------------------------------------------------------------------------------------------------------------------------------------------------------------------------------------------------------------------------------------------------------------------|-------------------------------------------------------------------|----------------------------------------------------------------------------------------------------------------------------------------------------------------------------------------------------------------------------------------------------------------------------------------------------------------------------------------------------------------------------------------------------------------------------------------------------------------------------------------------------------------------------------------------------------------------------------|
| Blickem (21)      | CKD Stage 3                            | 20                     | <p>“To explore the experience of patient-led assessment for network support (PLANS) from the perspectives of participants and telephone support workers.” (p.1)</p> <p>Intervention: see Table 4 Blakeman (47)</p>                                                  | Interviews and focus groups:<br>No analytic methodology discussed | <ul style="list-style-type: none"> <li>• Mixed reception from participants</li> <li>• Formulation of “health” in everyday life (i.e. participants unaware of having CKD or its significance - confused about relevance of PLANS)</li> <li>• Trajectories and tipping points (i.e. engagement in PLANS depended on participants’ stage of life – either could influence trying new things or disrupt routines)</li> <li>• Trust in networks (i.e. unwillingness to seek support, intrusive, others saw improved awareness/access to local resources; tailored support)</li> </ul> |
| Heiden (69)       | CKD pre-dialysis, dialysis, transplant | 5                      | <p>To identify participant’s perspective regarding a “web application prototype to help make decisions regarding diet restrictions and phosphate binder dosage.” (p.544)</p> <p>Intervention: Website tool for patients that included 3 components – diet/fluid</p> | Interviews: no analytic methodology discussed                     | <ul style="list-style-type: none"> <li>• Benefits: <ul style="list-style-type: none"> <li>○ Education tool increased insight and understanding</li> <li>○ Assisted in tracking and choosing best food alternative</li> <li>○ Decision support for binder dosage</li> </ul> </li> <li>• Limitations: <ul style="list-style-type: none"> <li>○ Targeted users familiar with using computers</li> <li>○ Users had different information needs</li> <li>○ One-way communication</li> <li>○ Need self-care resources in place to carry out recommendations</li> </ul> </li> </ul>     |

## CKD self-management interventions

|             |                                      |                               |                                                                                                                                                                                                                                                                                                                                                                                          |                                                                |                                                                                                                                                                                                                                                                                                                                                                                                                                                                                                                                               |
|-------------|--------------------------------------|-------------------------------|------------------------------------------------------------------------------------------------------------------------------------------------------------------------------------------------------------------------------------------------------------------------------------------------------------------------------------------------------------------------------------------|----------------------------------------------------------------|-----------------------------------------------------------------------------------------------------------------------------------------------------------------------------------------------------------------------------------------------------------------------------------------------------------------------------------------------------------------------------------------------------------------------------------------------------------------------------------------------------------------------------------------------|
|             |                                      |                               | education; diet registry; and phosphate binder decision support tool.                                                                                                                                                                                                                                                                                                                    |                                                                |                                                                                                                                                                                                                                                                                                                                                                                                                                                                                                                                               |
| Jansen (70) | CKD Stages 4 – 5                     | 7                             | <p>Feasibility of “a psychosocial intervention to assist ESRD patients and their partners in integrating renal disease and treatment into daily activities, primary work and thereby increasing autonomy.” (p.280)</p> <p>Intervention: Group teaching and handbook regarding coping strategies and goals based on self-regulation, social learning and self-determination theories.</p> | Interviews: no analytic methodology discussed                  | <ul style="list-style-type: none"> <li>• Benefits: <ul style="list-style-type: none"> <li>○ Group included pre-dialysis and dialysis patients</li> <li>○ Leaders addressed individual needs, situations and questions</li> </ul> </li> <li>• Limitations: <ul style="list-style-type: none"> <li>○ Patient preferences for information differed by stages of CKD</li> <li>○ Patient schedules need to be considered when intervention offered</li> <li>○ Consider offering intervention shortly after diagnosis of CKD</li> </ul> </li> </ul> |
| Thomas (33) | Type 1 or 2 DM with microalbuminuria | 5 (3 face-to-face interviews) | To evaluate “whether patients understood the content of the pack and whether they could make any recommendations.”                                                                                                                                                                                                                                                                       | Questionnaire and interview: no analytic methodology discussed | <ul style="list-style-type: none"> <li>• Mixed responses</li> <li>• DVD – content distressing and took effort to use</li> <li>• Written material useful, but need to elaborate on seriousness of disease</li> <li>• Package helped change behavior – stop smoking, monitoring DM</li> </ul>                                                                                                                                                                                                                                                   |

## CKD self-management interventions

|               |                                                             |    |                                                                                                                                                                                                                                                                     |                                                   |                                                                                                                                                                                                                                                                                                                                                                                                                                                                                                                                                                                                                               |
|---------------|-------------------------------------------------------------|----|---------------------------------------------------------------------------------------------------------------------------------------------------------------------------------------------------------------------------------------------------------------------|---------------------------------------------------|-------------------------------------------------------------------------------------------------------------------------------------------------------------------------------------------------------------------------------------------------------------------------------------------------------------------------------------------------------------------------------------------------------------------------------------------------------------------------------------------------------------------------------------------------------------------------------------------------------------------------------|
|               |                                                             |    | (p.275)<br>Intervention: See Table 4 Thomas (30)                                                                                                                                                                                                                    |                                                   |                                                                                                                                                                                                                                                                                                                                                                                                                                                                                                                                                                                                                               |
| Williams (22) | CKD Stages 2 – 4 with diabetes and cardiovascular disease   | 26 | “Examine the perceptions of a group of CALD participants with comorbid diabetes, chronic kidney disease and cardiovascular disease ... using an intervention to influence their medication self-efficacy.” (p. 1271)<br><br>Intervention: see Table 4 Williams (44) | Interviews: Ritchie and Spencer thematic approach | <ul style="list-style-type: none"> <li>• Attitudes towards taking medications (i.e. appreciate importance of taking; medication burden; concern with the number of medications, effectiveness and side effects of medications)</li> <li>• Having to take medications (i.e. behaviors and family support to assist taking medications; forgetting and non-adherent; motivation to take to prevent becoming worse)</li> <li>• Impediments to chronic illness medication self-efficacy (i.e. lack of knowledge regarding medication; strong faith in physician’s advice; multiple medications too overwhelming; cost)</li> </ul> |
| Williams (23) | CKD Stages 2 – 4, with coexisting diabetes and hypertension | 39 | Individual perceptions of a “telephone call using a motivational interviewing approach to improve medication adherence in participants with co-existing diabetes, CKD and hypertension.”                                                                            | Interviews: Ritchie and Spencer thematic approach | <ul style="list-style-type: none"> <li>• Importance of health (i.e. determined the degree of health behavior; altered medications or use of alternative medicine to control health)</li> <li>• Perceived seriousness of disease (i.e. thinking about mortality; comorbidities complicate care; acute illness with chronic conditions)</li> <li>• Perceived threat of disease (i.e. want to learn about disease control earlier; symptom management; looking for reasons to explain why ill)</li> </ul>                                                                                                                        |

1  
2  
3  
4  
5  
6  
7  
8  
9  
10  
11  
12  
13  
14  
15  
16  
17  
18  
19  
20  
21  
22  
23  
24  
25  
26  
27  
28  
29  
30  
31  
32  
33  
34  
35  
36  
37  
38  
39  
40  
41  
42  
43  
44  
45  
46  
47

|  |  |  |                                                          |  |  |
|--|--|--|----------------------------------------------------------|--|--|
|  |  |  | (p.472)<br>Intervention: see<br>Table 4 Williams<br>(43) |  |  |
|--|--|--|----------------------------------------------------------|--|--|

For peer review only

## DISCUSSION

To our knowledge, this is the first scoping review involving patients as research partners to identify and summarize self-management interventions for adults with CKD. The scoping review methodology enabled us to systematically summarize a broad range of self-management interventions, and describe their features. We identified 50 studies that investigated self-management interventions for adults with CKD, with considerable variation in interventions, outcomes assessed and results obtained (i.e. some improved and/or some worsened and/or some did not change). We found that self-management interventions for CKD is an emerging area with most studies published within the last five years, and may be related to the growing recognition of the importance of incorporating patients and their families in managing their disease to improve outcomes (7).

Our findings are similar to prior reviews reporting that the design of self-management interventions for CKD have not been theoretically driven and have been predominately designed by healthcare professionals without input from patients (13, 14). Person-centered care is changing how healthcare professionals deliver care to patients, but more importantly how patients and their families are actively involved in self-managing their chronic conditions (71). Engaging patients by having them co-design self-management interventions will ensure that patient preferences based on their values, culture, and psychosocial needs will be addressed in the self-management intervention (12-14). Through our current national partnership with patients, researchers and clinicians we have the opportunity to obtain patient perspectives, along with incorporating a behavior change theory to inform the future design of a self-management intervention for CKD.

## CKD self-management interventions

1  
2  
3 Only 28% of studies that we identified included patients with CKD plus other comorbidities,  
4 despite the common presence of comorbidities in this patient population. Less than one-quarter  
5 of included studies provided information on how to manage comorbid conditions such as  
6 tracking lab results and symptom management. This highlights the need to consider “whole  
7 person care”, where the self-management intervention needs to encompass the physical, mental  
8 and emotional needs of the patient (72, 73) that are important to them, as well as meeting the  
9 individuals desires by collaboration between relevant providers (71).

10  
11  
12  
13  
14  
15  
16  
17  
18  
19  
20 Forty-five different self-management interventions were identified, with one or more topics  
21 presented in a variety of formats and by a variety of providers. Symptom management and  
22 lifestyle topics were not included in many of the interventions. Based on prior work (3), non-  
23 dialysis patients with CKD have indicated that these were important topics for them in managing  
24 their CKD with an aim to slow the progression of CKD, and will be important to consider in the  
25 development of future interventions. Face to face was the most common delivery format while  
26 electronic (internet or mobile application) was least common, with many studies reporting  
27 multiple formats (i.e. face to face and printed materials). With the expansion of electronic  
28 platforms for supporting patients and providers in the uptake of evidence-based care, there is the  
29 potential to use an electronic format to support patients in self-managing their CKD and other  
30 co-morbidities (74). It is worth noting that there was variability in duration and frequency of face  
31 to face encounters, from a single session to multiple sessions over weeks to months. While  
32 varied options for in-person delivery is good if it meets the needs of the patients and their  
33 families, it may not be feasible on a larger scale due to the resources required. Only five studies  
34 looked at self-management health care cost-effectiveness, health care utilization and access, each  
35 measuring different end-points with mixed results. Future self-management interventions should

## CKD self-management interventions

1  
2  
3 include the essential principles to self-management (e.g. accessing relevant health information,  
4 adhering to multiple treatment protocols, changing health behaviors, shared decision making  
5 with healthcare providers) (7, 75), along with evaluation of the cost-effectiveness and resource  
6 utilization.  
7  
8  
9

10  
11  
12  
13 The majority of studies did not identify a single primary outcome but rather multiple outcomes.  
14  
15 We found that physiological outcomes (i.e. blood pressure) were the most commonly reported  
16 and symptoms were the least mentioned. These findings demonstrate the lack of patient driven  
17 outcomes that may be important to them. For example, a patient's individual health goals across  
18 a variety of dimensions (i.e. symptoms, mobility, social and role function in the family or  
19 community) that could possibly maximize their quality of life. Work by Tong et al. (2015)  
20 highlights this concept, where patients with CKD are more interested in treatment choices that  
21 influence non-traditional clinical outcomes such as impact on family and lifestyle (72). A holistic  
22 approach should be considered where mental and psychosocial outcomes are investigated, rather  
23 than just physiological endpoints.  
24  
25  
26  
27  
28  
29  
30  
31  
32  
33  
34  
35

36  
37 Our findings from the qualitative studies looking at patient perspectives are inconclusive because  
38 of the limited number of studies and the heterogeneity of the interventions. Havas et al. (2016)  
39 similarly reported a lack of research related to patient perspectives on self-management in CKD  
40 (12). There is also a lack of qualitative studies overall, which could provide valuable information  
41 regarding attitudes and challenges of self-management interventions from the perspective of both  
42 providers and patients.  
43  
44  
45  
46  
47  
48  
49  
50

51 Strengths of our study include the comprehensive nature of our search, inclusion of all study  
52 designs and consideration of self-management features that have not been investigated  
53 previously. We also engaged patient partners in determining the research question, advising us  
54  
55  
56  
57  
58  
59  
60

1  
2  
3 on search terms, grey literature sources and reviewing the results to ensure we captured and  
4 reported the data meaningfully. One of the main limitations was the challenge in synthesizing the  
5 data given its heterogeneous nature. To address this challenge the two reviewers used two  
6 standardized tools TIDieR (19) and the EPOC tool (20) to independently extract data, and  
7 independently coded the outcomes into categories using the Self-and Family Management  
8 Framework (6). Also, we were unable to assess the self-management outcomes in terms of  
9 sustained changes in behavior, physiological, and health status. A final limitation was our  
10 inability to draw conclusions regarding the most effective self-management intervention for adult  
11 patients with CKD, keeping in mind our aim was to review the breadth of the current literature  
12 and present the gaps that exist.  
13  
14  
15  
16  
17  
18  
19  
20  
21  
22  
23  
24  
25

26  
27 Overall, we found considerable variation in self-management interventions for adults with CKD  
28 with respect to their content and delivery, as well as the outcomes assessed and results obtained.  
29 Major gaps in the literature include the lack of patient engagement in the design of the self-  
30 management intervention, along with the lack of a behavioral change theory to inform their  
31 design. Our future research will incorporate intervention frameworks to co-develop and evaluate  
32 a self-management intervention based on a sound behavioral theory involving our national  
33 patient partners, specialists, primary care providers, and decision makers.  
34  
35  
36  
37  
38  
39  
40  
41  
42

#### 43 **ACKNOWLEDGEMENTS**

44  
45  
46 Diane Lorenzetti for providing support and direction regarding search strategies. We would also  
47 like to thank Sarah Gil in assisting us with acquiring full text studies.  
48  
49  
50  
51  
52  
53  
54  
55  
56  
57  
58  
59  
60



## CONFLICT OF INTEREST STATEMENT

All authors certify that our manuscript has not been published in whole or in part elsewhere, nor is it currently being considered for publication elsewhere. All authors declare that they have no relevant conflicts of interest.

## AUTHORS' CONTRIBUTIONS

MD, BK, HB, SS, PR, GH, AT, AG, BW, CL, CL, LH, MN, MJ, ME, NF, SB, SS and HRB contributed to the research idea and study design. MD and BK acquired the data. MD, BK and BRH completed data analysis and interpretation. MD, BK, HB, SS, PR, GH, AT, AG, BW, CL, CL, LH, MN, MJ, ME, NF, SB, SS and HRB contributed important intellectual content during manuscript drafting and revisions. All authors read and approved the final manuscript. BRH and PR provided mentorship.

## FUNDING

Ms. Maoliosa Donald is a recipient of the 2016 Alberta SPOR Graduate Studentships in Patient-Oriented Research. Alberta SPOR Graduate Studentships in Patient-Oriented Research are jointly funded by Alberta Innovates and the Canadian Institute of Health Research. Dr. Brenda Hemmelgarn is supported by the Roy and Vi Baay Chair in Kidney Research, Canadian Institutes of Health Research's Strategy for Patient-Oriented Research (SPOR). The funding organizations had no role in the design and conduct of the study; data collection, analysis and interpretation; or preparation, review or approval of the manuscript.

**DATA SHARING STATEMENT**

The following data will be available, study protocol and analysis plan to anyone who wishes to access the data and will be available immediately following publication from the corresponding author.

**TABLES**

Table 1 Characteristics of studies

Table 2 Overall characteristics of self-management interventions

Table 3 Summary of quantitative outcomes

Table 4 summary of quantitative studies

Table 5 Summary of qualitative studies

**FIGURES**

Figure 1 Prisma flow diagram

**SUPPLEMENTARY MATERIAL**

Table S1. Search strategies used to search traditional databases

Table S2. Search strategies used to search Canadian Agency for Drugs and Technology (CADTH) databases

**REFERENCES**

1. Arora P, Vasa P, Brenner D, et al. Prevalence estimates of chronic kidney disease in Canada: Results of a nationally representative survey. *CMAJ*.185(9):E417-23, 2013
2. Tonelli M, Wiebe N, Guthrie B, et al. Comorbidity as a driver of adverse outcomes in people with chronic kidney disease. *Kidney Int*.88(4):859-66, 2015
3. Hemmelgarn BR, Pannu N, Ahmed SB, et al. Determining the research priorities for patients with chronic kidney disease not on dialysis. *Nephrology, dialysis, transplantation*.32(5):847-54, 2017
4. Tong A, Chando S, Crowe S, et al. A systematic review. *American Journal of Kidney Diseases*.65(5):674-83, 2015
5. Richard AA, Shea K. Delineation of self-care and associated concepts. *J Nurs Scholarsh*.43(3):255-64, 2011
6. Grey M, Schulman-Green D, Knafk K, Reynolds NR. A revised Self- and Family Management Framework. *Nurs Outlook*.63(2):162-70, 2015
7. Novak M, Costantini L, Schneider S, Beanlands H. Approaches to self-management in chronic illness. *Semin Dial*.26(2):188-94, 2013
8. Lopez-Vargas PA, Tong A, Howell M, Craig JC. Educational interventions for patients with CKD: A systematic review. *American Journal of Kidney Diseases*.68(3):353-70, 2016
9. Mason, J., Khunti, K., Stone, M., Farooqi, A., & Carr, S. (2008). Educational interventions in kidney disease care: a systematic review of randomized trials. *American Journal of Kidney Diseases*. 51(6), 933-951
10. Lee, M., Wu, S., Hsieh, N., & Tsai, J. (2016). Self-management programs on eGFR, depression, and quality of life among patients with chronic kidney disease: A meta-analysis. *Asian Nursing Research*. 10(4), 255-262. doi:<https://doi.org/10.1016/j.anr.2016.04.002>
11. Lin, M.-Y., Liu, M. F., Hsua, L.-F., & Tsai, P.-S. (2017). Effects of self-management on chronic kidney disease: A meta-analysis. *International Journal of Nursing Studies*. doi:10.1016/j.ijnurstu.2017.06.008
12. Havas K, Bonner A, Douglas C. Self-management support for people with chronic kidney disease: Patient perspectives. *Journal of Renal Care*.42(1):7-14, 2016

13. Bonner A, Havas K, Douglas C, Thepha T, Bennett P, Clark R. Self-management programmes in stages 1-4 chronic kidney disease: A literature review. *Journal of Renal Care*.40(3):194-204, 2014
14. Welch JL, Johnson M, Zimmerman L, Russell CL, Perkins SM, Decker BS. Self-management interventions in stages 1 to 4 chronic kidney disease: An integrative review. *West J Nurs Res*.37(5):652-78, 2015
15. Levac D, Colquhoun H, O'Brien KK. Scoping studies: Advancing the methodology. *Implementation Science*.IS.5:69, 2010
16. Levin A. Canadians Seeking Solutions and Innovations to Overcome Chronic Kidney Disease (Can-SOLVE CKD). *CIHR Grant*. 2015
17. Peters MD, Godfrey CM, Khalil H, McInerney P, Parker D, Soares CB. Guidance for conducting systematic scoping reviews. *Int J Evid-based Healthc*.13(3):141-6, 2015
18. Canadian Agency for Drugs and Technologies in Health (CADTH). Grey Matters: A practical search tool for evidence-based medicine. <https://www.cadth.ca/resources/finding-evidence/grey-matters>, Accessed September 2015
19. Template for intervention description and replication (TIDieR) checklist. <http://www.equator-network.org/wp-content/uploads/2014/03/TIDieR-Checklist-PDF>, Accessed September 2016
20. Effective Practice and Organisation of Care (EPOC) data collection. <http://epoc.cochrane.org/epoc-specific-resources-review-authors>, Accessed October 2016
21. Blickem C, Kennedy A, Jariwala P. et al. Aligning everyday life priorities with people's self-management support networks: An exploration of the work and implementation of a needed telephone support system. *BMC Health Services Research*.14:262, 2014
22. Williams A, Manias E, Cross W, Crawford K. Motivational interviewing to explore culturally and linguistically diverse people's comorbidity medication self-efficacy. *Journal of Clinical Nursing*.24(9-10):1269-79, 2015
23. Williams A, Manias E. Exploring motivation and confidence in taking prescribed medicines in coexisting diseases: A qualitative study. *Journal of Clinical Nursing*.23(3-4):471-81, 2014
24. Walker RC, Marshall MR, Polaschek NR. A prospective clinical trial of specialist renal nursing in the primary care setting to prevent progression of chronic kidney: A quality improvement report. *BMC Family Practice*.15:155, 2014
25. Penaloza-Ramos MC, Jowett S, Mant J, Schwartz C. et al. Cost-effectiveness of self-management of blood pressure in hypertensive patients over 70 years with suboptimal control

## CKD self-management interventions

- 1  
2  
3 and established cardiovascular disease or additional cardiovascular risk diseases (TASMIN-  
4 SR). *European Journal of Preventive Cardiology*.23(9):902-12, 2016  
5  
6  
7 26. Bryne J, Khunti K, Stone M, Farooqi A, Carr S. Feasibility of a structured group education  
8 session to improve self-management of blood pressure in people with chronic kidney disease:  
9 An open randomised pilot trial. *BMJ Open*. 2011  
10  
11 27. Kao Y, Huang Y, Chen P, Wang K. The effects of exercise education intervention on the  
12 exercise behaviour, depression, and fatigue status of chronic kidney disease patients. *Health*  
13 *Education*.112(6):472-84, 2012  
14  
15 28. Murali S, Arab L, Vargas R, Rastogi A, Ang A, Shetty N. Internet-based tools to assess diet  
16 and provide feedback in chronic kidney disease stage IV: A pilot study. *Journal of Renal*  
17 *Nutrition*.23(2):e33-42, 2013  
18  
19 29. Vann JC, Hawley J, Wegner S, Falk RJ, Harward DH, Kshirsagar AV. Nursing intervention  
20 aimed at improving self-management for persons with chronic kidney disease in North  
21 Carolina Medicaid: A pilot project. *Nephrology Nursing Journal*.42(3):239-55, 2015  
22  
23 30. Montoya V, Sole ML, Norris AE. Improving the care of patients with chronic kidney disease  
24 using group visits: A pilot study to reflect an emphasis on the patients rather than the  
25 Disease. *Nephrology Nursing Journal*.43(3):207-22, 2016  
26  
27 31. Kazawa K, Moriyama M. Effects of a self-management skills-acquisition program on pre-  
28 dialysis patients with diabetic nephropathy. *Nephrology Nursing Journal*.40(2):141-8, 2013  
29  
30 32. Nauta J, van der Boog J, Slegten J, Janssen R, Hettinga M. Web-based lifestyle management  
31 for chronic kidney disease. *eTELEMED 2013, The Fifth International Conference on*  
32 *eHealth, Telemedicine, and Social Medicine*; Nice, France: 141-146, 2013  
33  
34 33. Thomas N, Bryar R. An evaluation of a self-management package for people with diabetes at  
35 risk of chronic kidney disease. *Primary health care research & development*.14(3):270-80,  
36 2013  
37  
38 34. Binik YM, Devins GM, Barre PE. et al. Live and learn: Patient education delays the need to  
39 initiate renal replacement therapy in end-stage renal disease. *The Journal of Nervous and*  
40 *Mental Disease*.181(6):371-6, 1993  
41  
42 35. Gillis BP, Caggiula AW, Chiavacci AT. et al. Nutrition intervention program of the  
43 modification of diet in renal disease study: A self-management approach. *Journal of the*  
44 *American Dietetic Association*.95(11):1288-94, 1995  
45  
46 36. Devins GM, Barré, PE, Binik YM. Predialysis psychoeducational intervention and coping  
47 styles influence time to dialysis in chronic kidney disease. *American Journal of Kidney*  
48 *Diseases*.42(4):693-703, 2003  
49  
50  
51  
52  
53  
54  
55  
56  
57  
58  
59  
60

- 1  
2  
3 37. Devins GM, Mendelssohn DC, Barre PE, Taub K, Binik YM. Predialysis psychoeducational  
4 intervention extends survival in CKD: A 20-year follow-up. *American Journal of Kidney*  
5 *Diseases*.46(6):1088-98, 2005  
6
- 7  
8 38. Campbell KL, Ash S, Bauer JD. The impact of nutrition intervention on quality of life in pre-  
9 dialysis chronic kidney disease patients. *Clin Nutr*.27(4):537-44, 2008  
10
- 11  
12 39. Chen SH, Tsai YF, Sun CY, Wu IW, Lee CC, Wu MS. The impact of self-management  
13 support on the progression of chronic kidney disease--a prospective randomized controlled  
14 trial. *Nephrology, Dialysis, Transplantation*.26(11):3560-6, 2011  
15
- 16  
17 40. Flesher M, Woo P, Chiu A, Charlebois A, Warburton DE, Leslie B. Self-management and  
18 biomedical outcomes of a cooking, and exercise program for patients with chronic kidney  
19 disease. *Journal of Renal Nutrition*.21(2):188-95, 2011  
20
- 21  
22 41. Joboshi H, Oka M, Takahashi S. et al. Effects of the EASE program in chronic kidney  
23 disease education: A randomized controlled trial to evaluate self-management. *J Jpn Acad*  
24 *Nurs Sci*.32(1):21-9, 2012
- 25  
26 42. Williams A, Manias E, Walker R, Gorelik A. A multifactorial intervention to improve blood  
27 pressure control in co-existing diabetes and kidney disease: A feasibility randomized  
28 controlled trial. *Journal of Advanced Nursing*.68(11):2515-25, 2012  
29
- 30  
31 43. Williams AM, Liew D, Gock H, Gorelik A. Working with CALD groups: Testing the  
32 feasibility of an intervention to improve medication self- management in people with kidney  
33 disease, diabetes, and cardiovascular disease. *Renal Society of Australasia Journal*.8(2):62-9,  
34 2012  
35
- 36  
37 44. de Brito-Ashurst I, Perry L, Sanders TA. et al. The role of salt intake and salt sensitivity in  
38 the management of hypertension in South Asian people with chronic kidney disease: A  
39 randomised controlled trial. *Heart*.99(17):1256-60, 2013  
40
- 41  
42 45. Paes-Barreto JG, Silva MI, Qureshi AR. et al. Can renal nutrition education improve  
43 adherence to a low-protein diet in patients with stages 3 to 5 chronic kidney disease? *Journal*  
44 *of Renal Nutrition*.23(3):164-71, 2013  
45
- 46  
47 46. Blakeman T, Blickem C, Kennedy A. et al. Effect of information and telephone-guided  
48 access to community support for people with chronic kidney disease: Randomised controlled  
49 trial. *PloS one*.9(10):e109135, 2014  
50
- 51  
52 47. McManus R, Mant J, Haque MS. et al. Effect of self-monitoring and medication self-titration  
53 on systolic blood pressure in hypertensive patients at high risk of cardiovascular disease: The  
54 TASMIN-SR randomized clinical trial. *JAMA*.312(8):799, 2014  
55
- 56  
57 48. Park J, Lyles RH, Bauer-Wu S. Mindfulness meditation lowers muscle sympathetic nerve  
58 activity and blood pressure in African-American males with chronic kidney disease.  
59  
60

## CKD self-management interventions

- 1  
2  
3  
4  
5  
6  
7  
8  
9  
10  
11  
12  
13  
14  
15  
16  
17  
18  
19  
20  
21  
22  
23  
24  
25  
26  
27  
28  
29  
30  
31  
32  
33  
34  
35  
36  
37  
38  
39  
40  
41  
42  
43  
44  
45  
46  
47  
48  
49  
50  
51  
52  
53  
54  
55  
56  
57  
58  
59  
60
- American Journal of Physiology Regulatory, Integrative and Comparative Physiology*.307(1):R93-R101, 2014
49. Howden EJC, Strand H, Douglas B, Campbell K, Isbel N. Exercise training in CKD: Efficacy, adherence, and safety. *American Journal of Kidney Diseases*.65(4):583-91, 2015
50. Leehey DJ, Collins E, Kramer HJ. et al. Structured exercise in obese diabetic patients with chronic kidney disease: A randomized controlled trial. *American Journal of Nephrology*.44(1):54-62, 2016
51. Robinson JA, Robinson KJ, Lewis DJ. Games: A motivational educational strategy. *ANNA Journal*.15(5):277-9, 1988
52. Klang B, Bjorvell H, Berglund J, Sundstedt C, Clyne N. Predialysis patient education: Effects on functioning and well-being in uraemic patients. *Journal of Advanced Nursing*.28(1):36-44, 1998
53. Cupisti A, Morelli E, Meola M, Barsotti M, Barsotti G. Vegetarian diet alternated with conventional low-protein diet for patients with chronic renal failure. *Journal of Renal Nutrition*.12(1):32-7, 2002
54. Gutierrez Vilaplana JM, Zampieron A, Craver L, Buja A. Evaluation of psychological outcomes following the intervention 'teaching group': Study on predialysis patients. *Journal of Renal Care*.35(3):159-64, 2009
55. Pagels A, Wang M, Magnusson A, Eriksson A, Melander S. Using patient diary in chronic illness care: Evaluation of a tool promoting self-care. *Vard I Norden*.28(3):49-52, 2008
56. Yen M, Huang JJ, Teng HL. Education for patients with chronic kidney disease in Taiwan: A prospective repeated measures study. *Journal of Clinical Nursing*.17(21):2927-34, 2008
57. Gutierrez Vilaplana JM, Pinol ES, Ponsa JC, Moncasi P. Evaluacion de la intervencion ensenanza: grupo en la consulta de enfermedad renal cronica avanzada. *Rev Soc Esp Enferm Nefrol*.10(4):280-5, 2007
58. Wu IW, Wang SY, Hsu KH. et al. Multidisciplinary predialysis education decreases the incidence of dialysis and reduces mortality--a controlled cohort study based on the NKF/DOQI guidelines. *Nephrology Dialysis Transplantation*.24(11):3426-33, 2009
59. Wierdsma J, van Zuilen A, van der Bijl J. Self-efficacy and long-term medication use in patients with chronic kidney disease. *Journal of Renal Care*.37(3):158-66, 2011
60. Aguilera Florez AI, Velasco MP, Romero LG. et al. A little-used strategy in caring for patients with chronic kidney disease: Multidisciplinary education of patients and their relatives. *Enferm Nefrol*.15(1):14-21, 2012

- 1  
2  
3 61. Choi ES, Lee J. Effects of a face-to-face self-management program on knowledge, self-care  
4 practice and kidney function in patients with chronic kidney disease before the renal  
5 replacement therapy. *Journal of Korean Academy of Nursing*.42(7):1070-8, 2012  
6
- 7  
8 62. Diamantidis CJ, Fink W, Yang S, Zuckerman MR. et al. Directed use of the internet for  
9 health information by patients with chronic kidney disease: prospective cohort study. *J Med*  
10 *Internet Res*.15(11):e251, 2013  
11
- 12 63. Lin CC, Tsai FM, Lin HS, Hwang SJ, Chen HC. Effects of a self-management program on  
13 patients with early-stage chronic kidney disease: A pilot study. *Appl Nurs Res*.26(3):151-6,  
14 2013  
15
- 16  
17 64. Walker R, Marshall MR, Polaschek NR. Improving self-management in chronic kidney  
18 disease: A pilot study. *Renal Society of Australasia Journal*.9(3):116-25, 2013  
19
- 20 65. Wright Nunes J, Greene JH, Wallston K, Eden S, Shintani A, Elasy T, Rothman R, Ikizler T,  
21 Cavanaugh KL: Pilot study of a physician-delivered education tool to increase patient  
22 knowledge about CKD. *American Journal of Kidney Diseases*.62(1):23-32, 2013  
23  
24
- 25 66. Enworom CD, Tabi M. Evaluation of kidney disease education on clinical outcomes and  
26 knowledge of self-management behaviors of patients with chronic kidney disease.  
27 *Nephrology Nursing Journal*.42(4):363-72, 2015  
28
- 29 67. Cupisti A, D'Alessandro C, Di Iorio B. et al. Nutritional support in the tertiary care of  
30 patients affected by chronic renal insufficiency: Report of a step-wise, personalized,  
31 pragmatic approach. *BMC Nephrology*.17(1):124, 2016  
32  
33
- 34 68. Ong SW, Jassal SV, Miller JA. et al. Integrating a Smartphone-Based Self-Management  
35 System into Usual Care of Advanced CKD. *CJASN*.11(6):1054-62, 2016  
36  
37
- 38 69. Heiden S, Buus AA, Jensen MH, Hejlesen OK. A diet management information and  
39 communication system to help chronic kidney patients cope with diet restrictions. *Stud*  
40 *Health Technol Inform*.192:543-7, 2013  
41
- 42 70. Jansen DL, Heijmans M, Rijken M, Kaptein AA. The development of and first experiences  
43 with a behavioural self-regulation intervention for end-stage renal disease patients and their  
44 partners. *Journal of Health Psychology*.16(2):274-83, 2011  
45  
46
- 47 71. Brummel-Smith, K., Butler, D., Frieder, M., Gibbs, N., Henry, M., Koons, E., . . . The  
48 American Geriatrics Society Expert Panel on Person-Centered, C. (2016). Person-centered  
49 care: A definition and essential elements. *Journal of the American Geriatrics Society*. 64(1),  
50 15-18. doi:10.1111/jgs.13866  
51
- 52 72. Tong A, Sainsbury P, Chadban S. et al. Patients' experiences and perspectives of living with  
53 CKD. *American Journal of Kidney Diseases*.53(4):689-700, 2009  
54  
55  
56  
57  
58  
59



## CKD self-management interventions

- 1  
2  
3 73. Hutchinson TA, Hutchinson N, Arnaert A. Whole person care: Encompassing the two faces  
4 of medicine. *CMAJ*.180(8):845-6, 2009  
5  
6  
7 74. Trisolini M, Roussel A, Zerhusen E. et al. Activating chronic kidney disease patients and  
8 family members through the Internet to promote integration of care. *Int J Integr Care*.4:e17,  
9 2004  
10  
11 75. Ong SW, Jassal SV, Porter E, Logan AG, Miller JA. Using an electronic self-management  
12 tool to support patients with Chronic Kidney Disease (CKD): A CKD clinic self-care model.  
13 *Semin Dial*.26(2):195-202, 2013  
14  
15  
16  
17  
18  
19  
20  
21  
22  
23  
24  
25  
26  
27  
28  
29  
30  
31  
32  
33  
34  
35  
36  
37  
38  
39  
40  
41  
42  
43  
44  
45  
46  
47  
48  
49  
50  
51  
52  
53  
54  
55  
56  
57  
58  
59  
60

For peer review only

1  
2  
3  
4  
5  
6  
7  
8  
9  
10  
11  
12  
13  
14  
15  
16  
17  
18  
19  
20  
21  
22  
23  
24  
25  
26  
27  
28  
29  
30  
31  
32  
33  
34  
35  
36  
37  
38  
39  
40  
41  
42  
43  
44  
45  
46  
47  
48  
49  
50  
51  
52  
53  
54  
55  
56  
57  
58  
59  
60

Figure 1. PRISMA Flow Diagram

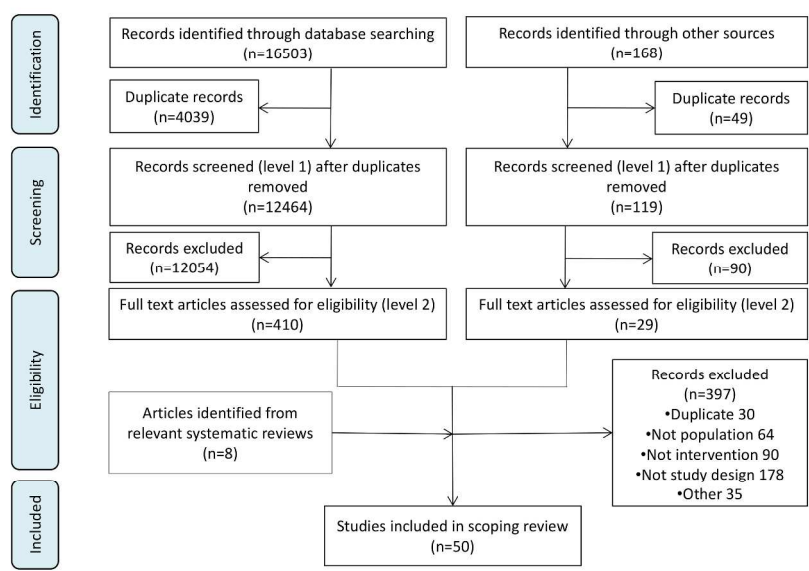

270x203mm (300 x 300 DPI)

View only

**Table S1. Search strategies used to search traditional databases**

| <b>MEDLINE search via OVID</b>                               |                                                                                                                                                                                                                                                                                                                                                                                                                                                                                         |                |
|--------------------------------------------------------------|-----------------------------------------------------------------------------------------------------------------------------------------------------------------------------------------------------------------------------------------------------------------------------------------------------------------------------------------------------------------------------------------------------------------------------------------------------------------------------------------|----------------|
| <b>Dates: Inception (1946) to present (October 26, 2016)</b> |                                                                                                                                                                                                                                                                                                                                                                                                                                                                                         |                |
| <b>October 26, 2016 at 1:36 pm</b>                           |                                                                                                                                                                                                                                                                                                                                                                                                                                                                                         |                |
| <b>#</b>                                                     | <b>Searches</b>                                                                                                                                                                                                                                                                                                                                                                                                                                                                         | <b>Results</b> |
| 1                                                            | exp Renal Insufficiency, Chronic/                                                                                                                                                                                                                                                                                                                                                                                                                                                       | 96206          |
| 2                                                            | (chronic kidney failure or chronic renal failure or kidney failure, chronic or renal failure, chronic or failure, chronic kidney or failure, chronic renal or chronic kidney disease* or chronic kidney insufficienc* or chronic renal disease* or chronic renal insufficienc* or disease*, chronic kidney or disease*, chronic renal or kidney disease*, chronic or kidney insufficienc*, chronic or renal disease*, chronic or renal insufficienc*, chronic or Predialysis or CKD).tw | 64304          |
| 3                                                            | 1 or 2                                                                                                                                                                                                                                                                                                                                                                                                                                                                                  | 124633         |
| 4                                                            | exp Self Care/                                                                                                                                                                                                                                                                                                                                                                                                                                                                          | 46548          |
| 5                                                            | (care, self or self care or self-care or self-management or disease management or patient-centred care or patient centred care or patient-centered or patient centered or self monitor* or self-monitor* or self-efficacy or self efficacy or self-regulat* or self regulat* or patient orient* monitor* or patient-orient* monitor* or health educat* or health promot* or patient educat*).tw                                                                                         | 138032         |
| 6                                                            | exp Adaptation, Psychological/ or exp Behavior Therapy/ or exp Health Behavior/ or exp Peer Group/ or exp Social Support/ or exp Self-Help Groups/ or exp Patient Education as Topic/                                                                                                                                                                                                                                                                                                   | 427541         |
| 7                                                            | (psychosocial intervention* or psycho-educational intervention* or behavioral intervention* or health behavior* or support or peer support*).ti                                                                                                                                                                                                                                                                                                                                         | 795044         |
| 8                                                            | 4 or 5 or 6 or 7                                                                                                                                                                                                                                                                                                                                                                                                                                                                        | 1261025        |
| 9                                                            | 3 and 8                                                                                                                                                                                                                                                                                                                                                                                                                                                                                 | 6959           |
| 10                                                           | (dialysis or hemodialysis or haemodialysis).ti                                                                                                                                                                                                                                                                                                                                                                                                                                          | 69512          |
| 11                                                           | 9 not 10                                                                                                                                                                                                                                                                                                                                                                                                                                                                                | 4872           |

| <b>EMBASE search via OVID</b>                                |                                                                                                                                                                                                                                                                                                                                                                                                                                                                                         |                |
|--------------------------------------------------------------|-----------------------------------------------------------------------------------------------------------------------------------------------------------------------------------------------------------------------------------------------------------------------------------------------------------------------------------------------------------------------------------------------------------------------------------------------------------------------------------------|----------------|
| <b>Dates: Inception (1974) to present (October 25, 2016)</b> |                                                                                                                                                                                                                                                                                                                                                                                                                                                                                         |                |
| <b>October 26, 2016 at 1:55 pm</b>                           |                                                                                                                                                                                                                                                                                                                                                                                                                                                                                         |                |
| <b>#</b>                                                     | <b>Searches</b>                                                                                                                                                                                                                                                                                                                                                                                                                                                                         | <b>Results</b> |
| 1                                                            | exp chronic kidney disease/ or exp chronic kidney failure/                                                                                                                                                                                                                                                                                                                                                                                                                              | 114971         |
| 2                                                            | (chronic kidney failure or chronic renal failure or kidney failure, chronic or renal failure, chronic or failure, chronic kidney or failure, chronic renal or chronic kidney disease* or chronic kidney insufficienc* or chronic renal disease* or chronic renal insufficienc* or disease*, chronic kidney or disease*, chronic renal or kidney disease*, chronic or kidney insufficienc*, chronic or renal disease*, chronic or renal insufficienc*, chronic or Predialysis or CKD).tw | 91596          |
| 3                                                            | 1 or 2                                                                                                                                                                                                                                                                                                                                                                                                                                                                                  | 133908         |
| 4                                                            | exp self care/                                                                                                                                                                                                                                                                                                                                                                                                                                                                          | 66210          |
| 5                                                            | (care, self or self care or or self-care or self-management or disease management or patient-centred care or patient centred care or patient-centered or patient centered or self monitor* or self-monitor* or self-efficacy or self efficacy or self-regulat* or self regulat* or patient orient* monitor* or patient-orient* monitor* or health educat* or health promot* or patient educat*).tw                                                                                      | 167301         |
| 6                                                            | exp wellbeing/ or exp adaptive behavior/ or exp psychoeducation/ or exp social adaptation/ or exp coping behavior/ or exp behavior therapy/ or exp health behavior/ or exp patient education/ or peer group/ or support group/ or self-help/                                                                                                                                                                                                                                            | 719350         |
| 7                                                            | (psychosocial intervention* or psycho-educational intervention* or behavioral intervention* or health behavior* or support or peer support*).tw                                                                                                                                                                                                                                                                                                                                         | 959549         |
| 8                                                            | 4 or 5 or 6 or 7                                                                                                                                                                                                                                                                                                                                                                                                                                                                        | 1692732        |
| 9                                                            | 3 and 8                                                                                                                                                                                                                                                                                                                                                                                                                                                                                 | 8746           |
| 10                                                           | (dialysis or hemodialysis or haemodialysis).ti                                                                                                                                                                                                                                                                                                                                                                                                                                          | 87234          |
| 11                                                           | 9 not 10                                                                                                                                                                                                                                                                                                                                                                                                                                                                                | 7258           |

| <b>PsycINFO search via OVID</b>                       |                                                                                                                                                                                                                                                                                                                                                                                                                                                                                         |                |
|-------------------------------------------------------|-----------------------------------------------------------------------------------------------------------------------------------------------------------------------------------------------------------------------------------------------------------------------------------------------------------------------------------------------------------------------------------------------------------------------------------------------------------------------------------------|----------------|
| <b>Dates: Inception (1806) to October Week 3 2016</b> |                                                                                                                                                                                                                                                                                                                                                                                                                                                                                         |                |
| <b>October 26, 2016 at 2:23 PM</b>                    |                                                                                                                                                                                                                                                                                                                                                                                                                                                                                         |                |
| <b>#</b>                                              | <b>Searches</b>                                                                                                                                                                                                                                                                                                                                                                                                                                                                         | <b>Results</b> |
| 1                                                     | exp Kidney Diseases/                                                                                                                                                                                                                                                                                                                                                                                                                                                                    | 1802           |
| 2                                                     | (chronic kidney failure or chronic renal failure or kidney failure, chronic or renal failure, chronic or failure, chronic kidney or failure, chronic renal or chronic kidney disease* or chronic kidney insufficienc* or chronic renal disease* or chronic renal insufficienc* or disease*, chronic kidney or disease*, chronic renal or kidney disease*, chronic or kidney insufficienc*, chronic or renal disease*, chronic or renal insufficienc*, chronic or Predialysis or CKD).tw | 995            |
| 3                                                     | 1 or 2                                                                                                                                                                                                                                                                                                                                                                                                                                                                                  | 2206           |
| 4                                                     | exp Self-Management/ or exp Self-Care Skills/ or exp Self-Efficacy/                                                                                                                                                                                                                                                                                                                                                                                                                     | 26573          |
| 5                                                     | (care, self or self care or or self-care or self-management or disease management or patient-centred care or patient centred care or patient-centered or patient centered or self monitor* or self-monitor* or self-efficacy or self efficacy or self-regulat* or self regulat* or patient orient* monitor* or patient-orient* monitor* or health educat* or health promot* or patient educat*).tw                                                                                      | 95899          |
| 6                                                     | exp emotional adjustment/ or exp coping behavior/ or exp well being/ or exp social adjustment/ or exp health behavior/ or exp behavior therapy/ or exp psychoeducation/ or exp client education/ or exp support groups/                                                                                                                                                                                                                                                                 | 148066         |
| 7                                                     | (psychosocial intervention* or psycho-educational intervention* or behavioral intervention* or health behavior* or support or peer support*).tw                                                                                                                                                                                                                                                                                                                                         | 405092         |
| 8                                                     | 4 or 5 or 6 or 7                                                                                                                                                                                                                                                                                                                                                                                                                                                                        | 582953         |
| 9                                                     | 3 and 8                                                                                                                                                                                                                                                                                                                                                                                                                                                                                 | 506            |
| 10                                                    | (dialysis or hemodialysis or haemodialysis).ti.                                                                                                                                                                                                                                                                                                                                                                                                                                         | 1281           |
| 11                                                    | 9 not 10                                                                                                                                                                                                                                                                                                                                                                                                                                                                                | 368            |

| <b>Cochrane Central Register of Controlled Trials search via OVID</b> |                                                                                                                                                                                                                                                                                                                                                                                                                                                                                         |                |
|-----------------------------------------------------------------------|-----------------------------------------------------------------------------------------------------------------------------------------------------------------------------------------------------------------------------------------------------------------------------------------------------------------------------------------------------------------------------------------------------------------------------------------------------------------------------------------|----------------|
| <b>Dates: Inception to September 2016</b>                             |                                                                                                                                                                                                                                                                                                                                                                                                                                                                                         |                |
| <b>October 26, 2016 at 2:36 pm</b>                                    |                                                                                                                                                                                                                                                                                                                                                                                                                                                                                         |                |
| <b>#</b>                                                              | <b>Searches</b>                                                                                                                                                                                                                                                                                                                                                                                                                                                                         | <b>Results</b> |
| 1                                                                     | exp Renal Insufficiency, Chronic/                                                                                                                                                                                                                                                                                                                                                                                                                                                       | 3857           |
| 2                                                                     | (chronic kidney failure or chronic renal failure or kidney failure, chronic or renal failure, chronic or failure, chronic kidney or failure, chronic renal or chronic kidney disease* or chronic kidney insufficienc* or chronic renal disease* or chronic renal insufficienc* or disease*, chronic kidney or disease*, chronic renal or kidney disease*, chronic or kidney insufficienc*, chronic or renal disease*, chronic or renal insufficienc*, chronic or Predialysis or CKD).tw | 4416           |
| 3                                                                     | 1 or 2                                                                                                                                                                                                                                                                                                                                                                                                                                                                                  | 6614           |
| 4                                                                     | exp Self Care/                                                                                                                                                                                                                                                                                                                                                                                                                                                                          | 4111           |
| 5                                                                     | (care, self or self care or or self-care or self-management or disease management or patient-centred care or patient centred care or patient-centered or patient centered or self monitor* or self-monitor* or self-efficacy or self efficacy or self-regulat* or self regulat* or patient orient* monitor* or patient-orient* monitor* or health educat* or health promot* or patient educat*).tw                                                                                      | 14913          |
| 6                                                                     | exp Adaptation, Psychological/ or exp Behavior Therapy/ or exp Health Behavior/ or exp Peer Group/ or exp Social Support/ or exp Self-Help Groups/ or exp Patient Education as Topic/                                                                                                                                                                                                                                                                                                   | 32694          |
| 7                                                                     | (psychosocial intervention* or psycho-educational intervention* or behavioral intervention* or health behavior* or support or peer support*).tw                                                                                                                                                                                                                                                                                                                                         | 40963          |
| 8                                                                     | 4 or 5 or 6 or 7                                                                                                                                                                                                                                                                                                                                                                                                                                                                        | 76837          |
| 9                                                                     | 3 and 8                                                                                                                                                                                                                                                                                                                                                                                                                                                                                 | 375            |
| 10                                                                    | (dialysis or hemodialysis or haemodialysis).ti.                                                                                                                                                                                                                                                                                                                                                                                                                                         | 6157           |
| 11                                                                    | 9 not 10                                                                                                                                                                                                                                                                                                                                                                                                                                                                                | 251            |

| <b>Cochrane Database of Systematic Reviews search via OVID</b> |                                                                                                                                                                                                                                                                                                                                                                                                                                                                                         |                |
|----------------------------------------------------------------|-----------------------------------------------------------------------------------------------------------------------------------------------------------------------------------------------------------------------------------------------------------------------------------------------------------------------------------------------------------------------------------------------------------------------------------------------------------------------------------------|----------------|
| <b>Dates: 2005 to October 19, 2016</b>                         |                                                                                                                                                                                                                                                                                                                                                                                                                                                                                         |                |
| <b>October 26, 2016 at 2:43 pm</b>                             |                                                                                                                                                                                                                                                                                                                                                                                                                                                                                         |                |
| <b>#</b>                                                       | <b>Searches</b>                                                                                                                                                                                                                                                                                                                                                                                                                                                                         | <b>Results</b> |
| 1                                                              | (chronic kidney failure or chronic renal failure or kidney failure, chronic or renal failure, chronic or failure, chronic kidney or failure, chronic renal or chronic kidney disease* or chronic kidney insufficienc* or chronic renal disease* or chronic renal insufficienc* or disease*, chronic kidney or disease*, chronic renal or kidney disease*, chronic or kidney insufficienc*, chronic or renal disease*, chronic or renal insufficienc*, chronic or Predialysis or CKD).tw | 254            |
| 2                                                              | (care, self or self care or self-care or self-management or disease management or patient-centred care or patient centred care or patient-centered or patient centered or self monitor* or self-monitor* or self-efficacy or self efficacy or self-regulat* or self regulat* or patient orient* monitor* or patient-orient* monitor* or health educat* or health promot* or patient educat*).tw                                                                                         | 1359           |
| 3                                                              | (psychosocial intervention* or psycho-educational intervention* or behavioral intervention* or health behavior* or support or peer support*).tw                                                                                                                                                                                                                                                                                                                                         | 9203           |
| 4                                                              | 2 or 3                                                                                                                                                                                                                                                                                                                                                                                                                                                                                  | 9230           |
| 5                                                              | 1 and 4                                                                                                                                                                                                                                                                                                                                                                                                                                                                                 | 235            |
| 6                                                              | (dialysis or hemodialysis or haemodialysis).ti.                                                                                                                                                                                                                                                                                                                                                                                                                                         | 53             |
| 7                                                              | 5 not 6                                                                                                                                                                                                                                                                                                                                                                                                                                                                                 | 209            |

| <b>CINAHL Plus with Full Text</b>  |                                                                                                                                                                                                                                                                                                                                                                                                                                                                                                                                                                                                                                                                                                                                                                                                                                                                                                                                                                                    |                |
|------------------------------------|------------------------------------------------------------------------------------------------------------------------------------------------------------------------------------------------------------------------------------------------------------------------------------------------------------------------------------------------------------------------------------------------------------------------------------------------------------------------------------------------------------------------------------------------------------------------------------------------------------------------------------------------------------------------------------------------------------------------------------------------------------------------------------------------------------------------------------------------------------------------------------------------------------------------------------------------------------------------------------|----------------|
| <b>Dates: Inception to Present</b> |                                                                                                                                                                                                                                                                                                                                                                                                                                                                                                                                                                                                                                                                                                                                                                                                                                                                                                                                                                                    |                |
| <b>October 26, 2016 at 3:00 pm</b> |                                                                                                                                                                                                                                                                                                                                                                                                                                                                                                                                                                                                                                                                                                                                                                                                                                                                                                                                                                                    |                |
| <b>#</b>                           | <b>Searches</b>                                                                                                                                                                                                                                                                                                                                                                                                                                                                                                                                                                                                                                                                                                                                                                                                                                                                                                                                                                    | <b>Results</b> |
| S1                                 | (MH "Renal Insufficiency, Chronic+")                                                                                                                                                                                                                                                                                                                                                                                                                                                                                                                                                                                                                                                                                                                                                                                                                                                                                                                                               | 18210          |
| S2                                 | TI (chronic kidney failure or chronic renal failure or kidney failure, chronic or renal failure, chronic or failure, chronic kidney or failure, chronic renal or chronic kidney disease* or chronic kidney insufficienc* or chronic renal disease* or chronic renal insufficienc* or disease*, chronic kidney or disease*, chronic renal or kidney disease*, chronic or kidney insufficienc*, chronic or renal disease*, chronic or renal insufficienc*, chronic or Predialysis or CKD) OR AB (chronic kidney failure or chronic renal failure or kidney failure, chronic or renal failure, chronic or failure, chronic kidney or failure, chronic renal or chronic kidney disease* or chronic kidney insufficienc* or chronic renal disease* or chronic renal insufficienc* or disease*, chronic kidney or disease*, chronic renal or kidney disease*, chronic or kidney insufficienc*, chronic or renal disease*, chronic or renal insufficienc*, chronic or Predialysis or CKD) | 14082          |
| S3                                 | S1 OR S2                                                                                                                                                                                                                                                                                                                                                                                                                                                                                                                                                                                                                                                                                                                                                                                                                                                                                                                                                                           | 25927          |
| S4                                 | (MH "Self Care+")                                                                                                                                                                                                                                                                                                                                                                                                                                                                                                                                                                                                                                                                                                                                                                                                                                                                                                                                                                  | 34818          |
| S5                                 | TI (care, self or self care or or self-care or self-management or disease management or patient-centred care or patient centred care or patient-centered or patient centered or self monitor* or self-monitor* or self-efficacy or self efficacy or self-regulat* or self regulat* or patient orient* monitor* or patient-orient* monitor* or health educat* or health promot* or patient educat*) OR AB (care, self or self care or or self-care or self-management or disease management or patient-centred care or patient centred care or patient-centered or patient centered or self monitor* or self-monitor* or self-efficacy or self efficacy or self-regulat* or self regulat* or patient orient* monitor* or patient-orient* monitor* or health educat* or health promot* or patient educat*)                                                                                                                                                                           | 217,342        |
| S6                                 | (MH "Adaptation, Psychological+")                                                                                                                                                                                                                                                                                                                                                                                                                                                                                                                                                                                                                                                                                                                                                                                                                                                                                                                                                  | 25,552         |
| S7                                 | (MH "Psychoeducation")                                                                                                                                                                                                                                                                                                                                                                                                                                                                                                                                                                                                                                                                                                                                                                                                                                                                                                                                                             | 2,066          |
| S8                                 | (MH "Behavioral Changes")                                                                                                                                                                                                                                                                                                                                                                                                                                                                                                                                                                                                                                                                                                                                                                                                                                                                                                                                                          | 7,345          |
| S9                                 | (MH "Health Behavior+")                                                                                                                                                                                                                                                                                                                                                                                                                                                                                                                                                                                                                                                                                                                                                                                                                                                                                                                                                            | 70,654         |
| S10                                | (MH "Peer Group") OR (MH "Support Groups+")                                                                                                                                                                                                                                                                                                                                                                                                                                                                                                                                                                                                                                                                                                                                                                                                                                                                                                                                        | 16,890         |
| S11                                | (MH "Patient Education+")                                                                                                                                                                                                                                                                                                                                                                                                                                                                                                                                                                                                                                                                                                                                                                                                                                                                                                                                                          | 62,454         |
| S12                                | TI (psychosocial intervention* or psycho-educational intervention* or behavioral intervention* or health behavior* or support or peer support*) OR AB (psychosocial intervention* or psycho-educational intervention* or behavioral intervention* or health behavior* or support or peer support*)                                                                                                                                                                                                                                                                                                                                                                                                                                                                                                                                                                                                                                                                                 | 223,599        |

|     |                                                       |         |
|-----|-------------------------------------------------------|---------|
| S13 | S4 OR S5 OR S6 OR S7 OR S8 OR S9 OR S10 OR S11 OR S12 | 531,208 |
| S14 | S3 AND S13                                            | 4239    |
| S15 | TI dialysis or hemodialysis or haemodialysis          | 12802   |
| S16 | S14 NOT S15                                           | 3363    |

| <b>Web of Science</b>                                              |                                                                                                                                                                                                                                                                                                                                                                                                                                                                                                                                                                                                     |                |
|--------------------------------------------------------------------|-----------------------------------------------------------------------------------------------------------------------------------------------------------------------------------------------------------------------------------------------------------------------------------------------------------------------------------------------------------------------------------------------------------------------------------------------------------------------------------------------------------------------------------------------------------------------------------------------------|----------------|
| <b>Dates: 2006-2016</b>                                            |                                                                                                                                                                                                                                                                                                                                                                                                                                                                                                                                                                                                     |                |
| <b>Limited document types to Meeting Abstract, Meeting Summary</b> |                                                                                                                                                                                                                                                                                                                                                                                                                                                                                                                                                                                                     |                |
| <b>October 23, 2016 at 3:30 pm</b>                                 |                                                                                                                                                                                                                                                                                                                                                                                                                                                                                                                                                                                                     |                |
| <b>#</b>                                                           | <b>Searches</b>                                                                                                                                                                                                                                                                                                                                                                                                                                                                                                                                                                                     | <b>Results</b> |
| 1                                                                  | TS=(chronic kidney failure or chronic renal failure or kidney failure, chronic or renal failure, chronic or failure, chronic kidney or failure, chronic renal or chronic kidney disease* or chronic kidney insufficienc* or chronic renal disease* or chronic renal insufficienc* or disease*, chronic kidney or disease*, chronic renal or kidney disease*, chronic or kidney insufficienc*, chronic or renal disease*, chronic or renal insufficienc*, chronic or Predialysis or CKD) NOT TI=(dialysis or hemodialysis or haemodialysis)                                                          | 5704           |
| 2                                                                  | TS=(care, self or self care or or self-care or self-management or disease management or patient-centred care or patient centred care or patient-centered or patient centered or self monitor* or self-monitor* or self-efficacy or self efficacy or self-regulat* or self regulat* or patient orient* monitor* or patient-orient* monitor* or health educat* or health promot* or patient educat* or psychosocial intervention* or psycho-educational intervention* or behavioral intervention* or health behavior* or support or peer support*) NOT TI=(dialysis or hemodialysis or haemodialysis) | 35005          |
| 4                                                                  | #2 AND #1                                                                                                                                                                                                                                                                                                                                                                                                                                                                                                                                                                                           | 182            |

**Table S2. Search strategies used to search Canadian Agency for Drugs and Technology (CADTH) databases**

|                                                                          |                                                                                                                                                      |
|--------------------------------------------------------------------------|------------------------------------------------------------------------------------------------------------------------------------------------------|
| <b>Grey Literature – Google Canada</b>                                   |                                                                                                                                                      |
| <b>Limited to first 10 webpages in Google for each search strategy</b>   |                                                                                                                                                      |
| <b>October 02, 2016 at 2:30 pm</b>                                       |                                                                                                                                                      |
| <b>Search Terms</b>                                                      |                                                                                                                                                      |
| 1                                                                        | “Chronic kidney disease-transplant self-management”                                                                                                  |
| 2                                                                        | “Self-management in chronic kidney disease” (Google suggestion)                                                                                      |
| 3                                                                        | “self-efficacy and self-management behaviors in patients with chronic kidney disease” (Google suggestion)                                            |
| <b>Total hits: 110</b>                                                   |                                                                                                                                                      |
| <b>Articles/abstracts/theses/trials: 58</b>                              |                                                                                                                                                      |
| <b>Other (websites, reports, documents, etc.): 52</b>                    |                                                                                                                                                      |
| <b>Grey Literature – Google Canada</b>                                   |                                                                                                                                                      |
| <b>Limited to first 10 webpages in Google for each search strategy</b>   |                                                                                                                                                      |
| <b>October 21, 2016 at 1:30 pm</b>                                       |                                                                                                                                                      |
| <b>Search Terms</b>                                                      |                                                                                                                                                      |
| 1                                                                        | “chronic kidney disease” and “psychological” or “psychosocial” or “psycho-educational” interventions and “Self-management in chronic kidney disease” |
| 2                                                                        | “psychological effects of dialysis” (Google suggestion) – NOT RELEVANT                                                                               |
| 3                                                                        | “chronic kidney disease” and “behavioral intervention” or “health behaviors”                                                                         |
| <b>Total hits: 29</b>                                                    |                                                                                                                                                      |
| <b>Articles/abstracts/theses/trials: 18</b>                              |                                                                                                                                                      |
| <b>Other (websites, reports, documents, etc.): 11</b>                    |                                                                                                                                                      |
| <b>Grey Literature – CADTH Grey Matters</b>                              |                                                                                                                                                      |
| <b>Databases: HTA agencies, Clinical trials, Databases (free), Other</b> |                                                                                                                                                      |
| <b>October 03, 2016 at 9:30 am</b>                                       |                                                                                                                                                      |
| <b>Search Terms</b>                                                      |                                                                                                                                                      |
| 1                                                                        | “Chronic kidney disease self-management”                                                                                                             |
| 2                                                                        | “Chronic kidney disease”                                                                                                                             |
| <b>Total hits:</b>                                                       |                                                                                                                                                      |
| <b>HTA Agencies: 28 databases</b>                                        |                                                                                                                                                      |
| <b>Clinical Trials: 4 databases</b>                                      |                                                                                                                                                      |
| <b>Databases (free): 4 databases</b>                                     |                                                                                                                                                      |
| <b>Other: 1 database</b>                                                 |                                                                                                                                                      |

**\*Note:** No search in CADTH Grey Matters for “psychological” or “psychosocial” or “psycho-educational interventions” or “behavioral intervention” or “health behaviors” since “chronic kidney disease” was the main concept and thus would include all concepts related to any type of intervention.

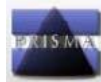

# PRISMA 2009 Checklist

| Section/topic                      | #  | Checklist item                                                                                                                                                                                                                                                                                              | Reported on page # |
|------------------------------------|----|-------------------------------------------------------------------------------------------------------------------------------------------------------------------------------------------------------------------------------------------------------------------------------------------------------------|--------------------|
| <b>TITLE</b>                       |    |                                                                                                                                                                                                                                                                                                             |                    |
| Title                              | 1  | Identify the report as a systematic review, meta-analysis, or both.                                                                                                                                                                                                                                         | 1                  |
| <b>ABSTRACT</b>                    |    |                                                                                                                                                                                                                                                                                                             |                    |
| Structured summary                 | 2  | Provide a structured summary including, as applicable: background; objectives; data sources; study eligibility criteria, participants, and interventions; study appraisal and synthesis methods; results; limitations; conclusions and implications of key findings; systematic review registration number. | 2                  |
| <b>INTRODUCTION</b>                |    |                                                                                                                                                                                                                                                                                                             |                    |
| Rationale                          | 3  | Describe the rationale for the review in the context of what is already known.                                                                                                                                                                                                                              | 5                  |
| Objectives                         | 4  | Provide an explicit statement of questions being addressed with reference to participants, interventions, comparisons, outcomes, and study design (PICOS).                                                                                                                                                  | 7                  |
| <b>METHODS</b>                     |    |                                                                                                                                                                                                                                                                                                             |                    |
| Protocol and registration          | 5  | Indicate if a review protocol exists, if and where it can be accessed (e.g., Web address), and, if available, provide registration information including registration number.                                                                                                                               | N/A                |
| Eligibility criteria               | 6  | Specify study characteristics (e.g., PICOS, length of follow-up) and report characteristics (e.g., years considered, language, publication status) used as criteria for eligibility, giving rationale.                                                                                                      | 8                  |
| Information sources                | 7  | Describe all information sources (e.g., databases with dates of coverage, contact with study authors to identify additional studies) in the search and date last searched.                                                                                                                                  | 8                  |
| Search                             | 8  | Present full electronic search strategy for at least one database, including any limits used, such that it could be repeated.                                                                                                                                                                               | Tables S1, S2      |
| Study selection                    | 9  | State the process for selecting studies (i.e., screening, eligibility, included in systematic review, and, if applicable, included in the meta-analysis).                                                                                                                                                   | 8                  |
| Data collection process            | 10 | Describe method of data extraction from reports (e.g., piloted forms, independently, in duplicate) and any processes for obtaining and confirming data from investigators.                                                                                                                                  | 9                  |
| Data items                         | 11 | List and define all variables for which data were sought (e.g., PICOS, funding sources) and any assumptions and simplifications made.                                                                                                                                                                       | 9                  |
| Risk of bias in individual studies | 12 | Describe methods used for assessing risk of bias of individual studies (including specification of whether this was done at the study or outcome level), and how this information is to be used in any data synthesis.                                                                                      | N/A                |
| Summary measures                   | 13 | State the principal summary measures (e.g., risk ratio, difference in means).                                                                                                                                                                                                                               | N/A                |
| Synthesis of results               | 14 | Describe the methods of handling data and combining results of studies, if done, including measures of consistency (e.g., I <sup>2</sup> ) for each meta-analysis.                                                                                                                                          | N/A                |



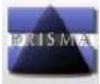

# PRISMA 2009 Checklist

Page 1 of 2

| Section/topic                 | #  | Checklist item                                                                                                                                                                                           | Reported on page #  |
|-------------------------------|----|----------------------------------------------------------------------------------------------------------------------------------------------------------------------------------------------------------|---------------------|
| Risk of bias across studies   | 15 | Specify any assessment of risk of bias that may affect the cumulative evidence (e.g., publication bias, selective reporting within studies).                                                             | N/A                 |
| Additional analyses           | 16 | Describe methods of additional analyses (e.g., sensitivity or subgroup analyses, meta-regression), if done, indicating which were pre-specified.                                                         | N/A                 |
| <b>RESULTS</b>                |    |                                                                                                                                                                                                          |                     |
| Study selection               | 17 | Give numbers of studies screened, assessed for eligibility, and included in the review, with reasons for exclusions at each stage, ideally with a flow diagram.                                          | Figure 1            |
| Study characteristics         | 18 | For each study, present characteristics for which data were extracted (e.g., study size, PICOS, follow-up period) and provide the citations.                                                             | Table 1, 2, 3, 4, 5 |
| Risk of bias within studies   | 19 | Present data on risk of bias of each study and, if available, any outcome level assessment (see item 12).                                                                                                | N/A                 |
| Results of individual studies | 20 | For all outcomes considered (benefits or harms), present, for each study: (a) simple summary data for each intervention group (b) effect estimates and confidence intervals, ideally with a forest plot. | N/A                 |
| Synthesis of results          | 21 | Present results of each meta-analysis done, including confidence intervals and measures of consistency.                                                                                                  | N/A                 |
| Risk of bias across studies   | 22 | Present results of any assessment of risk of bias across studies (see Item 15).                                                                                                                          | N/A                 |
| Additional analysis           | 23 | Give results of additional analyses, if done (e.g., sensitivity or subgroup analyses, meta-regression [see Item 16]).                                                                                    | N/A                 |
| <b>DISCUSSION</b>             |    |                                                                                                                                                                                                          |                     |
| Summary of evidence           | 24 | Summarize the main findings including the strength of evidence for each main outcome; consider their relevance to key groups (e.g., healthcare providers, users, and policy makers).                     | 37                  |
| Limitations                   | 25 | Discuss limitations at study and outcome level (e.g., risk of bias), and at review-level (e.g., incomplete retrieval of identified research, reporting bias).                                            | 39                  |
| Conclusions                   | 26 | Provide a general interpretation of the results in the context of other evidence, and implications for future research.                                                                                  | 40                  |
| <b>FUNDING</b>                |    |                                                                                                                                                                                                          |                     |
| Funding                       | 27 | Describe sources of funding for the systematic review and other support (e.g., supply of data); role of funders for the systematic review.                                                               | 41                  |

From: Moher D, Liberati A, Tetzlaff J, Altman DG, The PRISMA Group (2009). Preferred Reporting Items for Systematic Reviews and Meta-Analyses: The PRISMA Statement. PLoS Med 6(7): e1000097. doi:10.1371/journal.pmed1000097

For more information, visit: [www.prisma-statement.org](http://www.prisma-statement.org).

Page 2 of 2

For peer review only - <http://bmjopen.bmj.com/site/about/guidelines.xhtml>
