# Supplementary material for: Self-management interventions for adults with chronic kidney disease: a scoping review
Source: PubMed Central journal article supplement — BMJ Open. 2018 Mar 22;8(3):e019814. doi: 10.1136/bmjopen-2017-019814 (PMC5875600; doi:10.1136/bmjopen-2017-019814), 2018-03-22
Supplement: bmjopen-2017-019814supp001.pdf [file bmjopen-2017-019814supp001.pdf]

**Table S1. Search strategies used to search traditional databases**

| MEDLINE search via OVID                               |                                                                                                                                                                                                                                                                                                                                                                                                                                                                                         |         |
|-------------------------------------------------------|-----------------------------------------------------------------------------------------------------------------------------------------------------------------------------------------------------------------------------------------------------------------------------------------------------------------------------------------------------------------------------------------------------------------------------------------------------------------------------------------|---------|
| Dates: Inception (1946) to present (October 26, 2016) |                                                                                                                                                                                                                                                                                                                                                                                                                                                                                         |         |
| October 26, 2016 at 1:36 pm                           |                                                                                                                                                                                                                                                                                                                                                                                                                                                                                         |         |
| #                                                     | Searches                                                                                                                                                                                                                                                                                                                                                                                                                                                                                | Results |
| 1                                                     | exp Renal Insufficiency, Chronic/                                                                                                                                                                                                                                                                                                                                                                                                                                                       | 96206   |
| 2                                                     | (chronic kidney failure or chronic renal failure or kidney failure, chronic or renal failure, chronic or failure, chronic kidney or failure, chronic renal or chronic kidney disease* or chronic kidney insufficienc* or chronic renal disease* or chronic renal insufficienc* or disease*, chronic kidney or disease*, chronic renal or kidney disease*, chronic or kidney insufficienc*, chronic or renal disease*, chronic or renal insufficienc*, chronic or Predialysis or CKD).tw | 64304   |
| 3                                                     | 1 or 2                                                                                                                                                                                                                                                                                                                                                                                                                                                                                  | 124633  |
| 4                                                     | exp Self Care/                                                                                                                                                                                                                                                                                                                                                                                                                                                                          | 46548   |
| 5                                                     | (care, self or self care or self-care or self-management or disease management or patient-centred care or patient centred care or patient-centered or patient centered or self monitor* or self-monitor* or self-efficacy or self efficacy or self-regulat* or self regulat* or patient orient* monitor* or patient-orient* monitor* or health educat* or health promot* or patient educat*).tw                                                                                         | 138032  |
| 6                                                     | exp Adaptation, Psychological/ or exp Behavior Therapy/ or exp Health Behavior/ or exp Peer Group/ or exp Social Support/ or exp Self-Help Groups/ or exp Patient Education as Topic/                                                                                                                                                                                                                                                                                                   | 427541  |
| 7                                                     | (psychosocial intervention* or psycho-educational intervention* or behavioral intervention* or health behavior* or support or peer support*).tw                                                                                                                                                                                                                                                                                                                                         | 795044  |
| 8                                                     | 4 or 5 or 6 or 7                                                                                                                                                                                                                                                                                                                                                                                                                                                                        | 1261025 |
| 9                                                     | 3 and 8                                                                                                                                                                                                                                                                                                                                                                                                                                                                                 | 6959    |
| 10                                                    | (dialysis or hemodialysis or haemodialysis).ti.                                                                                                                                                                                                                                                                                                                                                                                                                                         | 69512   |
| 11                                                    | 9 not 10                                                                                                                                                                                                                                                                                                                                                                                                                                                                                | 4872    |

| EMBASE search via OVID                                |                                                                                                                                                                                                                                                                                                                                                                                                                                                                                         |         |
|-------------------------------------------------------|-----------------------------------------------------------------------------------------------------------------------------------------------------------------------------------------------------------------------------------------------------------------------------------------------------------------------------------------------------------------------------------------------------------------------------------------------------------------------------------------|---------|
| Dates: Inception (1974) to present (October 25, 2016) |                                                                                                                                                                                                                                                                                                                                                                                                                                                                                         |         |
| October 26, 2016 at 1:55 pm                           |                                                                                                                                                                                                                                                                                                                                                                                                                                                                                         |         |
| #                                                     | Searches                                                                                                                                                                                                                                                                                                                                                                                                                                                                                | Results |
| 1                                                     | exp chronic kidney disease/ or exp chronic kidney failure/                                                                                                                                                                                                                                                                                                                                                                                                                              | 114971  |
| 2                                                     | (chronic kidney failure or chronic renal failure or kidney failure, chronic or renal failure, chronic or failure, chronic kidney or failure, chronic renal or chronic kidney disease* or chronic kidney insufficienc* or chronic renal disease* or chronic renal insufficienc* or disease*, chronic kidney or disease*, chronic renal or kidney disease*, chronic or kidney insufficienc*, chronic or renal disease*, chronic or renal insufficienc*, chronic or Predialysis or CKD).tw | 91596   |
| 3                                                     | 1 or 2                                                                                                                                                                                                                                                                                                                                                                                                                                                                                  | 133908  |
| 4                                                     | exp self care/                                                                                                                                                                                                                                                                                                                                                                                                                                                                          | 66210   |
| 5                                                     | (care, self or self care or or self-care or self-management or disease management or patient-centred care or patient centred care or patient-centered or patient centered or self monitor* or self-monitor* or self-efficacy or self efficacy or self-regulat* or self regulat* or patient orient* monitor* or patient-orient* monitor* or health educat* or health promot* or patient educat*).tw                                                                                      | 167301  |
| 6                                                     | exp wellbeing/ or exp adaptive behavior/ or exp psychoeducation/ or exp social adaptation/ or exp coping behavior/ or exp behavior therapy/ or exp health behavior/ or exp patient education/ or peer group/ or support group/ or self-help/                                                                                                                                                                                                                                            | 719350  |
| 7                                                     | (psychosocial intervention* or psycho-educational intervention* or behavioral intervention* or health behavior* or support or peer support*).tw                                                                                                                                                                                                                                                                                                                                         | 959549  |
| 8                                                     | 4 or 5 or 6 or 7                                                                                                                                                                                                                                                                                                                                                                                                                                                                        | 1692732 |
| 9                                                     | 3 and 8                                                                                                                                                                                                                                                                                                                                                                                                                                                                                 | 8746    |
| 10                                                    | (dialysis or hemodialysis or haemodialysis).ti.                                                                                                                                                                                                                                                                                                                                                                                                                                         | 87234   |
| 11                                                    | 9 not 10                                                                                                                                                                                                                                                                                                                                                                                                                                                                                | 7258    |

| <b>PsycINFO search via OVID</b><br><b>Dates: Inception (1806) to October Week 3 2016</b><br><b>October 26, 2016 at 2:23 PM</b> |                                                                                                                                                                                                                                                                                                                                                                                                                                                                                         |         |
|--------------------------------------------------------------------------------------------------------------------------------|-----------------------------------------------------------------------------------------------------------------------------------------------------------------------------------------------------------------------------------------------------------------------------------------------------------------------------------------------------------------------------------------------------------------------------------------------------------------------------------------|---------|
| #                                                                                                                              | Searches                                                                                                                                                                                                                                                                                                                                                                                                                                                                                | Results |
| 1                                                                                                                              | exp Kidney Diseases/                                                                                                                                                                                                                                                                                                                                                                                                                                                                    | 1802    |
| 2                                                                                                                              | (chronic kidney failure or chronic renal failure or kidney failure, chronic or renal failure, chronic or failure, chronic kidney or failure, chronic renal or chronic kidney disease* or chronic kidney insufficienc* or chronic renal disease* or chronic renal insufficienc* or disease*, chronic kidney or disease*, chronic renal or kidney disease*, chronic or kidney insufficienc*, chronic or renal disease*, chronic or renal insufficienc*, chronic or Predialysis or CKD).tw | 995     |
| 3                                                                                                                              | 1 or 2                                                                                                                                                                                                                                                                                                                                                                                                                                                                                  | 2206    |
| 4                                                                                                                              | exp Self-Management/ or exp Self-Care Skills/ or exp Self-Efficacy/                                                                                                                                                                                                                                                                                                                                                                                                                     | 26573   |
| 5                                                                                                                              | (care, self or self care or or self-care or self-management or disease management or patient-centred care or patient centred care or patient-centered or patient centered or self monitor* or self-monitor* or self-efficacy or self efficacy or self-regulat* or self regulat* or patient orient* monitor* or patient-orient* monitor* or health educat* or health promot* or patient educat*).tw                                                                                      | 95899   |
| 6                                                                                                                              | exp emotional adjustment/ or exp coping behavior/ or exp well being/ or exp social adjustment/ or exp health behavior/ or exp behavior therapy/ or exp psychoeducation/ or exp client education/ or exp support groups/                                                                                                                                                                                                                                                                 | 148066  |
| 7                                                                                                                              | (psychosocial intervention* or psycho-educational intervention* or behavioral intervention* or health behavior* or support or peer support*).tw                                                                                                                                                                                                                                                                                                                                         | 405092  |
| 8                                                                                                                              | 4 or 5 or 6 or 7                                                                                                                                                                                                                                                                                                                                                                                                                                                                        | 582953  |
| 9                                                                                                                              | 3 and 8                                                                                                                                                                                                                                                                                                                                                                                                                                                                                 | 506     |
| 10                                                                                                                             | (dialysis or hemodialysis or haemodialysis).ti.                                                                                                                                                                                                                                                                                                                                                                                                                                         | 1281    |
| 11                                                                                                                             | 9 not 10                                                                                                                                                                                                                                                                                                                                                                                                                                                                                | 368     |

| <b>Cochrane Central Register of Controlled Trials search via OVID</b><br><b>Dates: Inception to September 2016</b><br><b>October 26, 2016 at 2:36 pm</b> |                                                                                                                                                                                                                                                                                                                                                                                                                                                                                         |         |
|----------------------------------------------------------------------------------------------------------------------------------------------------------|-----------------------------------------------------------------------------------------------------------------------------------------------------------------------------------------------------------------------------------------------------------------------------------------------------------------------------------------------------------------------------------------------------------------------------------------------------------------------------------------|---------|
| #                                                                                                                                                        | Searches                                                                                                                                                                                                                                                                                                                                                                                                                                                                                | Results |
| 1                                                                                                                                                        | exp Renal Insufficiency, Chronic/                                                                                                                                                                                                                                                                                                                                                                                                                                                       | 3857    |
| 2                                                                                                                                                        | (chronic kidney failure or chronic renal failure or kidney failure, chronic or renal failure, chronic or failure, chronic kidney or failure, chronic renal or chronic kidney disease* or chronic kidney insufficienc* or chronic renal disease* or chronic renal insufficienc* or disease*, chronic kidney or disease*, chronic renal or kidney disease*, chronic or kidney insufficienc*, chronic or renal disease*, chronic or renal insufficienc*, chronic or Predialysis or CKD).tw | 4416    |
| 3                                                                                                                                                        | 1 or 2                                                                                                                                                                                                                                                                                                                                                                                                                                                                                  | 6614    |
| 4                                                                                                                                                        | exp Self Care/                                                                                                                                                                                                                                                                                                                                                                                                                                                                          | 4111    |
| 5                                                                                                                                                        | (care, self or self care or or self-care or self-management or disease management or patient-centred care or patient centred care or patient-centered or patient centered or self monitor* or self-monitor* or self-efficacy or self efficacy or self-regulat* or self regulat* or patient orient* monitor* or patient-orient* monitor* or health educat* or health promot* or patient educat*).tw                                                                                      | 14913   |
| 6                                                                                                                                                        | exp Adaptation, Psychological/ or exp Behavior Therapy/ or exp Health Behavior/ or exp Peer Group/ or exp Social Support/ or exp Self-Help Groups/ or exp Patient Education as Topic/                                                                                                                                                                                                                                                                                                   | 32694   |
| 7                                                                                                                                                        | (psychosocial intervention* or psycho-educational intervention* or behavioral intervention* or health behavior* or support or peer support*).tw                                                                                                                                                                                                                                                                                                                                         | 40963   |
| 8                                                                                                                                                        | 4 or 5 or 6 or 7                                                                                                                                                                                                                                                                                                                                                                                                                                                                        | 76837   |
| 9                                                                                                                                                        | 3 and 8                                                                                                                                                                                                                                                                                                                                                                                                                                                                                 | 375     |
| 10                                                                                                                                                       | (dialysis or hemodialysis or haemodialysis).ti.                                                                                                                                                                                                                                                                                                                                                                                                                                         | 6157    |
| 11                                                                                                                                                       | 9 not 10                                                                                                                                                                                                                                                                                                                                                                                                                                                                                | 251     |

| Cochrane Database of Systematic Reviews search via OVID |                                                                                                                                                                                                                                                                                                                                                                                                                                                                                         |         |
|---------------------------------------------------------|-----------------------------------------------------------------------------------------------------------------------------------------------------------------------------------------------------------------------------------------------------------------------------------------------------------------------------------------------------------------------------------------------------------------------------------------------------------------------------------------|---------|
| Dates: 2005 to October 19, 2016                         |                                                                                                                                                                                                                                                                                                                                                                                                                                                                                         |         |
| October 26, 2016 at 2:43 pm                             |                                                                                                                                                                                                                                                                                                                                                                                                                                                                                         |         |
| #                                                       | Searches                                                                                                                                                                                                                                                                                                                                                                                                                                                                                | Results |
| 1                                                       | (chronic kidney failure or chronic renal failure or kidney failure, chronic or renal failure, chronic or failure, chronic kidney or failure, chronic renal or chronic kidney disease* or chronic kidney insufficienc* or chronic renal disease* or chronic renal insufficienc* or disease*, chronic kidney or disease*, chronic renal or kidney disease*, chronic or kidney insufficienc*, chronic or renal disease*, chronic or renal insufficienc*, chronic or Predialysis or CKD).tw | 254     |
| 2                                                       | (care, self or self care or self-care or self-management or disease management or patient-centred care or patient centred care or patient-centered or patient centered or self monitor* or self-monitor* or self-efficacy or self efficacy or self-regulat* or self regulat* or patient orient* monitor* or patient-orient* monitor* or health educat* or health promot* or patient educat*).tw                                                                                         | 1359    |
| 3                                                       | (psychosocial intervention* or psycho-educational intervention* or behavioral intervention* or health behavior* or support or peer support*).tw                                                                                                                                                                                                                                                                                                                                         | 9203    |
| 4                                                       | 2 or 3                                                                                                                                                                                                                                                                                                                                                                                                                                                                                  | 9230    |
| 5                                                       | 1 and 4                                                                                                                                                                                                                                                                                                                                                                                                                                                                                 | 235     |
| 6                                                       | (dialysis or hemodialysis or haemodialysis).ti.                                                                                                                                                                                                                                                                                                                                                                                                                                         | 53      |
| 7                                                       | 5 not 6                                                                                                                                                                                                                                                                                                                                                                                                                                                                                 | 209     |

| CINAHL Plus with Full Text  |                                                                                                                                                                                                                                                                                                                                                                                                                                                                                                                                                                                                                                                                                                                                                                                                                                                                                                                                                                                    |         |
|-----------------------------|------------------------------------------------------------------------------------------------------------------------------------------------------------------------------------------------------------------------------------------------------------------------------------------------------------------------------------------------------------------------------------------------------------------------------------------------------------------------------------------------------------------------------------------------------------------------------------------------------------------------------------------------------------------------------------------------------------------------------------------------------------------------------------------------------------------------------------------------------------------------------------------------------------------------------------------------------------------------------------|---------|
| Dates: Inception to Present |                                                                                                                                                                                                                                                                                                                                                                                                                                                                                                                                                                                                                                                                                                                                                                                                                                                                                                                                                                                    |         |
| October 26, 2016 at 3:00 pm |                                                                                                                                                                                                                                                                                                                                                                                                                                                                                                                                                                                                                                                                                                                                                                                                                                                                                                                                                                                    |         |
| #                           | Searches                                                                                                                                                                                                                                                                                                                                                                                                                                                                                                                                                                                                                                                                                                                                                                                                                                                                                                                                                                           | Results |
| S1                          | (MH "Renal Insufficiency, Chronic+")                                                                                                                                                                                                                                                                                                                                                                                                                                                                                                                                                                                                                                                                                                                                                                                                                                                                                                                                               | 18210   |
| S2                          | TI (chronic kidney failure or chronic renal failure or kidney failure, chronic or renal failure, chronic or failure, chronic kidney or failure, chronic renal or chronic kidney disease* or chronic kidney insufficienc* or chronic renal disease* or chronic renal insufficienc* or disease*, chronic kidney or disease*, chronic renal or kidney disease*, chronic or kidney insufficienc*, chronic or renal disease*, chronic or renal insufficienc*, chronic or Predialysis or CKD) OR AB (chronic kidney failure or chronic renal failure or kidney failure, chronic or renal failure, chronic or failure, chronic kidney or failure, chronic renal or chronic kidney disease* or chronic kidney insufficienc* or chronic renal disease* or chronic renal insufficienc* or disease*, chronic kidney or disease*, chronic renal or kidney disease*, chronic or kidney insufficienc*, chronic or renal disease*, chronic or renal insufficienc*, chronic or Predialysis or CKD) | 14082   |
| S3                          | S1 OR S2                                                                                                                                                                                                                                                                                                                                                                                                                                                                                                                                                                                                                                                                                                                                                                                                                                                                                                                                                                           | 25927   |
| S4                          | (MH "Self Care+")                                                                                                                                                                                                                                                                                                                                                                                                                                                                                                                                                                                                                                                                                                                                                                                                                                                                                                                                                                  | 34818   |
| S5                          | TI (care, self or self care or or self-care or self-management or disease management or patient-centred care or patient centred care or patient-centered or patient centered or self monitor* or self-monitor* or self-efficacy or self efficacy or self-regulat* or self regulat* or patient orient* monitor* or patient-orient* monitor* or health educat* or health promot* or patient educat*) OR AB (care, self or self care or or self-care or self-management or disease management or patient-centred care or patient centred care or patient-centered or patient centered or self monitor* or self-monitor* or self-efficacy or self efficacy or self-regulat* or self regulat* or patient orient* monitor* or patient-orient* monitor* or health educat* or health promot* or patient educat*)                                                                                                                                                                           | 217,342 |
| S6                          | (MH "Adaptation, Psychological+")                                                                                                                                                                                                                                                                                                                                                                                                                                                                                                                                                                                                                                                                                                                                                                                                                                                                                                                                                  | 25,552  |
| S7                          | (MH "Psychoeducation")                                                                                                                                                                                                                                                                                                                                                                                                                                                                                                                                                                                                                                                                                                                                                                                                                                                                                                                                                             | 2,066   |
| S8                          | (MH "Behavioral Changes")                                                                                                                                                                                                                                                                                                                                                                                                                                                                                                                                                                                                                                                                                                                                                                                                                                                                                                                                                          | 7,345   |
| S9                          | (MH "Health Behavior+")                                                                                                                                                                                                                                                                                                                                                                                                                                                                                                                                                                                                                                                                                                                                                                                                                                                                                                                                                            | 70,654  |
| S10                         | (MH "Peer Group") OR (MH "Support Groups+")                                                                                                                                                                                                                                                                                                                                                                                                                                                                                                                                                                                                                                                                                                                                                                                                                                                                                                                                        | 16,890  |
| S11                         | (MH "Patient Education+")                                                                                                                                                                                                                                                                                                                                                                                                                                                                                                                                                                                                                                                                                                                                                                                                                                                                                                                                                          | 62,454  |
| S12                         | TI (psychosocial intervention* or psycho-educational intervention* or behavioral intervention* or health behavior* or support or peer support*) OR AB (psychosocial intervention* or psycho-educational intervention* or behavioral intervention* or health behavior* or support or peer support*)                                                                                                                                                                                                                                                                                                                                                                                                                                                                                                                                                                                                                                                                                 | 223,599 |

|     |                                                       |         |
|-----|-------------------------------------------------------|---------|
| S13 | S4 OR S5 OR S6 OR S7 OR S8 OR S9 OR S10 OR S11 OR S12 | 531,208 |
| S14 | S3 AND S13                                            | 4239    |
| S15 | TI dialysis or hemodialysis or haemodialysis          | 12802   |
| S16 | S14 NOT S15                                           | 3363    |

| <b>Web of Science</b><br><b>Dates: 2006-2016</b><br><b>Limited document types to Meeting Abstract, Meeting Summary</b><br><b>October 23, 2016 at 3:30 pm</b> |                                                                                                                                                                                                                                                                                                                                                                                                                                                                                                                                                                                                     |         |
|--------------------------------------------------------------------------------------------------------------------------------------------------------------|-----------------------------------------------------------------------------------------------------------------------------------------------------------------------------------------------------------------------------------------------------------------------------------------------------------------------------------------------------------------------------------------------------------------------------------------------------------------------------------------------------------------------------------------------------------------------------------------------------|---------|
| #                                                                                                                                                            | Searches                                                                                                                                                                                                                                                                                                                                                                                                                                                                                                                                                                                            | Results |
| 1                                                                                                                                                            | TS=(chronic kidney failure or chronic renal failure or kidney failure, chronic or renal failure, chronic or failure, chronic kidney or failure, chronic renal or chronic kidney disease* or chronic kidney insufficienc* or chronic renal disease* or chronic renal insufficienc* or disease*, chronic kidney or disease*, chronic renal or kidney disease*, chronic or kidney insufficienc*, chronic or renal disease*, chronic or renal insufficienc*, chronic or Predialysis or CKD) NOT TI=(dialysis or hemodialysis or haemodialysis)                                                          | 5704    |
| 2                                                                                                                                                            | TS=(care, self or self care or or self-care or self-management or disease management or patient-centred care or patient centred care or patient-centered or patient centered or self monitor* or self-monitor* or self-efficacy or self efficacy or self-regulat* or self regulat* or patient orient* monitor* or patient-orient* monitor* or health educat* or health promot* or patient educat* or psychosocial intervention* or psycho-educational intervention* or behavioral intervention* or health behavior* or support or peer support*) NOT TI=(dialysis or hemodialysis or haemodialysis) | 35005   |
| 4                                                                                                                                                            | #2 AND #1                                                                                                                                                                                                                                                                                                                                                                                                                                                                                                                                                                                           | 182     |

**Table S2. Search strategies used to search Canadian Agency for Drugs and Technology (CADTH) databases**

|                                                                                                                                                               |                                                                                                                                                      |
|---------------------------------------------------------------------------------------------------------------------------------------------------------------|------------------------------------------------------------------------------------------------------------------------------------------------------|
| <b>Grey Literature – Google Canada</b><br><b>Limited to first 10 webpages in Google for each search strategy</b><br><b>October 02, 2016 at 2:30 pm</b>        |                                                                                                                                                      |
| <b>Search Terms</b>                                                                                                                                           |                                                                                                                                                      |
| 1                                                                                                                                                             | "Chronic kidney disease-transplant self-management"                                                                                                  |
| 2                                                                                                                                                             | "Self-management in chronic kidney disease" (Google suggestion)                                                                                      |
| 3                                                                                                                                                             | "self-efficacy and self-management behaviors in patients with chronic kidney disease" (Google suggestion)                                            |
| <b>Total hits: 110</b>                                                                                                                                        |                                                                                                                                                      |
| <b>Articles/abstracts/theses/trials: 58</b>                                                                                                                   |                                                                                                                                                      |
| <b>Other (websites, reports, documents, etc.): 52</b>                                                                                                         |                                                                                                                                                      |
| <b>Grey Literature – Google Canada</b><br><b>Limited to first 10 webpages in Google for each search strategy</b><br><b>October 21, 2016 at 1:30 pm</b>        |                                                                                                                                                      |
| <b>Search Terms</b>                                                                                                                                           |                                                                                                                                                      |
| 1                                                                                                                                                             | "chronic kidney disease" and "psychological" or "psychosocial" or "psycho-educational" interventions and "Self-management in chronic kidney disease" |
| 2                                                                                                                                                             | "psychological effects of dialysis" (Google suggestion) – NOT RELEVANT                                                                               |
| 3                                                                                                                                                             | "chronic kidney disease" and "behavioral intervention" or "health behaviors"                                                                         |
| <b>Total hits: 29</b>                                                                                                                                         |                                                                                                                                                      |
| <b>Articles/abstracts/theses/trials: 18</b>                                                                                                                   |                                                                                                                                                      |
| <b>Other (websites, reports, documents, etc.): 11</b>                                                                                                         |                                                                                                                                                      |
| <b>Grey Literature – CADTH Grey Matters</b><br><b>Databases: HTA agencies, Clinical trials, Databases (free), Other</b><br><b>October 03, 2016 at 9:30 am</b> |                                                                                                                                                      |
| <b>Search Terms</b>                                                                                                                                           |                                                                                                                                                      |
| 1                                                                                                                                                             | "Chronic kidney disease self-management"                                                                                                             |
| 2                                                                                                                                                             | "Chronic kidney disease"                                                                                                                             |
| <b>Total hits:</b>                                                                                                                                            |                                                                                                                                                      |
| <b>HTA Agencies: 28 databases</b>                                                                                                                             |                                                                                                                                                      |
| <b>Clinical Trials: 4 databases</b>                                                                                                                           |                                                                                                                                                      |
| <b>Databases (free): 4 databases</b>                                                                                                                          |                                                                                                                                                      |
| <b>Other: 1 database</b>                                                                                                                                      |                                                                                                                                                      |

**\*Note:** No search in CADTH Grey Matters for "psychological" or "psychosocial" or "psycho-educational interventions" or "behavioral intervention" or "health behaviors" since "chronic kidney disease" was the main concept and thus would include all concepts related to any type of intervention.
